# Supplementary material for: Mammary Epithelial Cell Transcriptome Reveals Potential Roles of lncRNAs in Regulating Milk Synthesis Pathways in Jersey and Kashmiri Cattle
Source: Research Square preprint supplement (doi:10.21203/rs.3.rs-281012/v1), 2021-03-12
Supplement: Supplementary file 1 [file 84fcbcc587678b6205e6ce52.xlsx]

## Sheet: JERSEY
GENE	LNCRNA	CORELLATION	P-VALUE	ADJUSTED P VALUE
A2M	XLOC_009932	-0.517887	0.29262	0.351478
A2M	XLOC_022241	-0.471756	0.344862	0.397109
A2M	XLOC_015932	-0.430666	0.39394	0.440237
A2M	XLOC_020132	-0.390479	0.44405	0.484503
A2M	XLOC_014062	-0.342708	0.506064	0.53972
A2M	XLOC_023491	-0.261456	0.616752	0.641379
A2M	XLOC_013593	-0.104762	0.843431	0.854344
A2M	XLOC_005034	-0.0441897	0.933759	0.938498
A2M	XLOC_009668	-0.00698852	0.989517	0.990279
A2M	XLOC_015281	0.0515932	0.922679	0.928233
A2M	XLOC_011827	0.0554017	0.916982	0.92293
A2M	XLOC_005817	0.0709759	0.893715	0.901273
A2M	XLOC_022303	0.119047	0.822273	0.834606
A2M	XLOC_014188	0.23775	0.650094	0.67256
A2M	XLOC_019454	0.248024	0.635593	0.658976
A2M	XLOC_023728	0.296612	0.568129	0.596264
A2M	XLOC_002110	0.30172	0.561153	0.589816
A2M	XLOC_007175	0.44026	0.382278	0.429925
A2M	XLOC_005292	0.45053	0.369928	0.419092
A2M	XLOC_008525	0.455941	0.36348	0.413389
A2M	XLOC_026943	0.832053	0.0399408	0.0787634
AAK1,ENSBTAG00000047822	XLOC_014062	-0.646944	0.164969	0.230843
AAK1,ENSBTAG00000047822	XLOC_020132	-0.617742	0.191254	0.257302
AAK1,ENSBTAG00000047822	XLOC_023491	-0.604367	0.203824	0.269651
AAK1,ENSBTAG00000047822	XLOC_022241	-0.504269	0.307711	0.364682
AAK1,ENSBTAG00000047822	XLOC_009932	-0.485323	0.329171	0.383382
AAK1,ENSBTAG00000047822	XLOC_013593	-0.408823	0.42093	0.464069
AAK1,ENSBTAG00000047822	XLOC_015281	-0.379952	0.457497	0.496435
AAK1,ENSBTAG00000047822	XLOC_005292	0.0921904	0.862106	0.871783
AAK1,ENSBTAG00000047822	XLOC_026943	0.0926051	0.861489	0.871201
AAK1,ENSBTAG00000047822	XLOC_007175	0.271592	0.602628	0.628236
AAK1,ENSBTAG00000047822	XLOC_008525	0.677688	0.139086	0.203309
AAK1,ENSBTAG00000047822	XLOC_011827	0.699714	0.121719	0.18367
AAK1,ENSBTAG00000047822	XLOC_002110	0.755726	0.0822165	0.136519
AAK1,ENSBTAG00000047822	XLOC_023728	0.787383	0.0630034	0.111734
AAK1,ENSBTAG00000047822	XLOC_014188	0.815994	0.0476724	0.0903158
AAK1,ENSBTAG00000047822	XLOC_019454	0.829614	0.041074	0.080479
AAK1,ENSBTAG00000047822	XLOC_022303	0.884709	0.0191717	0.0441627
AAK1,ENSBTAG00000047822	XLOC_005817	0.909732	0.0118546	0.0302994
AAK1,ENSBTAG00000047822	XLOC_009668	0.936651	0.00589248	0.0177974
AAK1,ENSBTAG00000047822	XLOC_005034	0.943163	0.00475384	0.0151959
AAK1,ENSBTAG00000047822	XLOC_015932	0.980997	0.000538243	0.00385434
ABCA13	XLOC_022241	-0.802123	0.0548587	0.100573
ABCA13	XLOC_020132	-0.715931	0.109582	0.169552
ABCA13	XLOC_014062	-0.686137	0.132306	0.195757
ABCA13	XLOC_023491	-0.641428	0.16981	0.235744
ABCA13	XLOC_013593	-0.614717	0.194068	0.260077
ABCA13	XLOC_009932	-0.527789	0.281828	0.342009
ABCA13	XLOC_015281	-0.477876	0.337752	0.390868
ABCA13	XLOC_015932	-0.224962	0.668249	0.689568
ABCA13	XLOC_005034	0.107582	0.839249	0.850443
ABCA13	XLOC_009668	0.265866	0.610598	0.635648
ABCA13	XLOC_011827	0.291675	0.574895	0.60253
ABCA13	XLOC_005817	0.334136	0.517449	0.549974
ABCA13	XLOC_022303	0.38325	0.453271	0.492715
ABCA13	XLOC_019454	0.453893	0.365916	0.41554
ABCA13	XLOC_014188	0.496473	0.316477	0.372317
ABCA13	XLOC_023728	0.54815	0.260125	0.322548
ABCA13	XLOC_002110	0.585705	0.221906	0.286972
ABCA13	XLOC_005292	0.619446	0.189676	0.25574
ABCA13	XLOC_007175	0.656215	0.156967	0.222558
ABCA13	XLOC_008525	0.664853	0.149663	0.21481
ABCA13	XLOC_026943	0.974237	0.000987055	0.00541515
ABCA6	XLOC_011777	-0.432077	0.392216	0.530782
ABCA6	XLOC_003704	-0.349124	0.497591	0.584691
ABCA6	XLOC_015932	-0.319183	0.537485	0.611783
ABCA6	XLOC_015754	-0.303581	0.558617	0.626361
ABCA6	XLOC_017606	-0.245787	0.638744	0.686687
ABCA6	XLOC_009502	-0.15083	0.77547	0.802961
ABCA6	XLOC_005292	0.40829	0.421596	0.539974
ABCA6	XLOC_023658	0.44283	0.379174	0.528439
ABCA6	XLOC_005053	0.472945	0.343476	0.526098
ABCA6	XLOC_002110	0.476486	0.339361	0.526098
ABCA6	XLOC_011194	0.53238	0.276876	0.526098
ABCA6	XLOC_019584	0.558911	0.248931	0.526098
ABCA6	XLOC_026943	0.966315	0.00168295	0.00788918
ABCB11	XLOC_022241	-0.769552	0.0735405	0.125555
ABCB11	XLOC_020132	-0.682639	0.135095	0.198899
ABCB11	XLOC_014062	-0.653805	0.15903	0.224719
ABCB11	XLOC_023491	-0.591359	0.216362	0.281752
ABCB11	XLOC_013593	-0.578778	0.228774	0.293495
ABCB11	XLOC_011777	-0.529233	0.280266	0.526098
ABCB11	XLOC_009932	-0.480584	0.334623	0.38813
ABCB11	XLOC_015281	-0.460916	0.357585	0.408227
ABCB11	XLOC_003704	-0.367988	0.472934	0.568586
ABCB11	XLOC_015754	-0.26724	0.608682	0.663113
ABCB11	XLOC_017606	-0.246684	0.63748	0.685707
ABCB11	XLOC_015932	-0.226743	0.665715	0.70893
ABCB11	XLOC_015932	-0.213819	0.68416	0.704485
ABCB11	XLOC_009502	-0.124949	0.813552	0.836784
ABCB11	XLOC_005034	0.12366	0.815456	0.828215
ABCB11	XLOC_009668	0.278113	0.593587	0.619832
ABCB11	XLOC_011827	0.355811	0.488806	0.524225
ABCB11	XLOC_005817	0.362077	0.480619	0.516922
ABCB11	XLOC_022303	0.408196	0.421714	0.464753
ABCB11	XLOC_019454	0.444225	0.377493	0.425744
ABCB11	XLOC_005292	0.498533	0.314152	0.526098
ABCB11	XLOC_005292	0.505635	0.306185	0.363323
ABCB11	XLOC_023658	0.52107	0.289134	0.526098
ABCB11	XLOC_014188	0.526978	0.282705	0.342771
ABCB11	XLOC_007175	0.559586	0.248235	0.311731
ABCB11	XLOC_023728	0.567707	0.239923	0.304014
ABCB11	XLOC_002110	0.569267	0.23834	0.526098
ABCB11	XLOC_005053	0.569322	0.238284	0.526098
ABCB11	XLOC_002110	0.584895	0.222704	0.287729
ABCB11	XLOC_011194	0.611573	0.197011	0.5037
ABCB11	XLOC_019584	0.644279	0.1673	0.448513
ABCB11	XLOC_008525	0.680807	0.136566	0.200505
ABCB11	XLOC_026943	0.983754	0.000393732	0.00288287
ABCB11	XLOC_026943	0.986564	0.000269571	0.00271557
ABCD4	XLOC_024373	0.983	0.000431041	0.00980594
ABCG1	XLOC_022241	-0.745931	0.0886263	0.144427
ABCG1	XLOC_020132	-0.657838	0.155583	0.221101
ABCG1	XLOC_014062	-0.620165	0.189011	0.255071
ABCG1	XLOC_023491	-0.544072	0.264418	0.326431
ABCG1	XLOC_009932	-0.537298	0.271609	0.332912
ABCG1	XLOC_011777	-0.531276	0.278063	0.526098
ABCG1	XLOC_013593	-0.491939	0.321618	0.3768
ABCG1	XLOC_003704	-0.406976	0.423239	0.540886
ABCG1	XLOC_015281	-0.349452	0.497159	0.531693
ABCG1	XLOC_015754	-0.322529	0.532982	0.608729
ABCG1	XLOC_017606	-0.282431	0.587618	0.647272
ABCG1	XLOC_015932	-0.257762	0.62192	0.646226
ABCG1	XLOC_015932	-0.236387	0.652024	0.69771
ABCG1	XLOC_009502	-0.158177	0.764714	0.79348
ABCG1	XLOC_005034	0.109067	0.837049	0.848414
ABCG1	XLOC_009668	0.22639	0.666216	0.687656
ABCG1	XLOC_005817	0.285941	0.582778	0.609849
ABCG1	XLOC_011827	0.287659	0.580413	0.60766
ABCG1	XLOC_022303	0.344568	0.503603	0.537493
ABCG1	XLOC_019454	0.432821	0.39131	0.437922
ABCG1	XLOC_014188	0.457203	0.361982	0.412055
ABCG1	XLOC_023658	0.48196	0.333037	0.526098
ABCG1	XLOC_023728	0.51336	0.297606	0.355858
ABCG1	XLOC_002110	0.551383	0.256742	0.319481
ABCG1	XLOC_002110	0.572672	0.234897	0.526098
ABCG1	XLOC_005053	0.574535	0.233022	0.526098
ABCG1	XLOC_011194	0.588894	0.218772	0.526098
ABCG1	XLOC_005292	0.642416	0.168938	0.234867
ABCG1	XLOC_019584	0.644842	0.166806	0.447438
ABCG1	XLOC_008525	0.645927	0.165856	0.23175
ABCG1	XLOC_005292	0.650637	0.161761	0.43655
ABCG1	XLOC_007175	0.666828	0.148014	0.213044
ABCG1	XLOC_026943	0.96348	0.00197619	0.00831034
ABCG1	XLOC_026943	0.969334	0.0013962	0.00687762
ABCG2	XLOC_011777	-0.428578	0.396493	0.531652
ABCG2	XLOC_026943	-0.343435	0.505101	0.589635
ABCG2	XLOC_005292	-0.121423	0.81876	0.841365
ABCG2	XLOC_003704	0.113503	0.830476	0.851628
ABCG2	XLOC_017606	0.178617	0.734924	0.767684
ABCG2	XLOC_009502	0.314733	0.543488	0.61579
ABCG2	XLOC_019584	0.332999	0.518965	0.59928
ABCG2	XLOC_011194	0.399627	0.43247	0.545203
ABCG2	XLOC_002110	0.429545	0.39531	0.531325
ABCG2	XLOC_005053	0.446175	0.375148	0.527626
ABCG2	XLOC_023658	0.49456	0.318642	0.526098
ABCG2	XLOC_015754	0.548578	0.259677	0.526098
ABCG2	XLOC_015932	0.924593	0.0083149	0.0290617
ABHD11	XLOC_026943	-0.786512	0.0635009	0.112403
ABHD11	XLOC_008525	-0.770174	0.0731601	0.125069
ABHD11	XLOC_019454	-0.741824	0.0913776	0.147789
ABHD11	XLOC_002110	-0.700579	0.121058	0.182922
ABHD11	XLOC_023728	-0.689884	0.129346	0.19242
ABHD11	XLOC_007175	-0.681661	0.135879	0.199762
ABHD11	XLOC_014188	-0.629129	0.180812	0.246873
ABHD11	XLOC_005292	-0.614934	0.193866	0.259885
ABHD11	XLOC_022303	-0.56544	0.242232	0.306168
ABHD11	XLOC_005817	-0.555876	0.252068	0.315224
ABHD11	XLOC_009668	-0.503599	0.308461	0.365329
ABHD11	XLOC_005034	-0.431767	0.392595	0.439044
ABHD11	XLOC_011827	-0.188571	0.720496	0.738664
ABHD11	XLOC_015932	-0.143968	0.78554	0.800106
ABHD11	XLOC_015281	0.224471	0.668948	0.69022
ABHD11	XLOC_013593	0.449742	0.370871	0.41993
ABHD11	XLOC_014062	0.800305	0.0558355	0.101925
ABHD11	XLOC_023491	0.80302	0.05438	0.099896
ABHD11	XLOC_022241	0.813976	0.0486887	0.0917839
ABHD11	XLOC_020132	0.821211	0.0450909	0.0865156
ABHD11	XLOC_009932	0.939313	0.00541268	0.0167115
ABHD12	XLOC_002110	-0.89627	0.015582	0.037507
ABHD12	XLOC_023728	-0.844665	0.0343193	0.0699674
ABHD12	XLOC_014188	-0.837974	0.0372518	0.0745969
ABHD12	XLOC_022303	-0.822797	0.0443189	0.0853687
ABHD12	XLOC_008525	-0.820185	0.045593	0.0872571
ABHD12	XLOC_009668	-0.79989	0.0560592	0.102237
ABHD12	XLOC_005817	-0.78953	0.0617846	0.110099
ABHD12	XLOC_019454	-0.767666	0.0746979	0.127038
ABHD12	XLOC_011827	-0.760153	0.0793912	0.132987
ABHD12	XLOC_007175	-0.714333	0.110753	0.170924
ABHD12	XLOC_026943	-0.653441	0.159343	0.225043
ABHD12	XLOC_005034	-0.631035	0.179088	0.245142
ABHD12	XLOC_005292	-0.581465	0.2261	0.290952
ABHD12	XLOC_015932	-0.514364	0.296496	0.354889
ABHD12	XLOC_009932	0.418219	0.409246	0.453697
ABHD12	XLOC_023491	0.869029	0.0246069	0.0538231
ABHD12	XLOC_015281	0.901995	0.0139367	0.0343684
ABHD12	XLOC_020132	0.907879	0.0123385	0.031252
ABHD12	XLOC_022241	0.916314	0.0102119	0.0270004
ABHD12	XLOC_014062	0.917647	0.00989386	0.0263454
ABHD12	XLOC_013593	0.945574	0.00436271	0.0142795
ABHD13	XLOC_022241	-0.760703	0.0790434	0.132551
ABHD13	XLOC_020132	-0.676464	0.14008	0.204401
ABHD13	XLOC_014062	-0.644673	0.166955	0.232852
ABHD13	XLOC_023491	-0.572858	0.234709	0.299105
ABHD13	XLOC_013593	-0.53273	0.276499	0.33728
ABHD13	XLOC_009932	-0.51389	0.29702	0.355354
ABHD13	XLOC_015281	-0.405796	0.424718	0.467394
ABHD13	XLOC_015932	-0.213025	0.685297	0.705549
ABHD13	XLOC_005034	0.140312	0.790913	0.805175
ABHD13	XLOC_009668	0.277764	0.594069	0.620279
ABHD13	XLOC_011827	0.350974	0.495156	0.529908
ABHD13	XLOC_005817	0.359478	0.484009	0.519944
ABHD13	XLOC_022303	0.407565	0.422502	0.465457
ABHD13	XLOC_019454	0.456859	0.36239	0.412413
ABHD13	XLOC_005292	0.520991	0.28922	0.348493
ABHD13	XLOC_014188	0.525765	0.284021	0.343946
ABHD13	XLOC_023728	0.569433	0.238171	0.302366
ABHD13	XLOC_007175	0.572385	0.235187	0.299553
ABHD13	XLOC_002110	0.585486	0.222121	0.287177
ABHD13	XLOC_008525	0.688657	0.130311	0.193512
ABHD13	XLOC_026943	0.988731	0.000189773	0.00231436
ABHD2	XLOC_022241	-0.714261	0.110805	0.170987
ABHD2	XLOC_020132	-0.627731	0.182081	0.248151
ABHD2	XLOC_014062	-0.593748	0.214037	0.279531
ABHD2	XLOC_023491	-0.546963	0.261373	0.323667
ABHD2	XLOC_009932	-0.531537	0.277782	0.338418
ABHD2	XLOC_013593	-0.476666	0.339152	0.392086
ABHD2	XLOC_015281	-0.332497	0.519634	0.55193
ABHD2	XLOC_015932	-0.307161	0.553749	0.582998
ABHD2	XLOC_005034	0.0447633	0.9329	0.937719
ABHD2	XLOC_009668	0.180571	0.732087	0.74959
ABHD2	XLOC_011827	0.212841	0.68556	0.705792
ABHD2	XLOC_005817	0.267787	0.607921	0.63316
ABHD2	XLOC_022303	0.310917	0.548652	0.578319
ABHD2	XLOC_019454	0.391237	0.443087	0.483644
ABHD2	XLOC_014188	0.434329	0.389473	0.436277
ABHD2	XLOC_023728	0.485761	0.32867	0.382945
ABHD2	XLOC_002110	0.503141	0.308973	0.365785
ABHD2	XLOC_005292	0.519583	0.29076	0.349839
ABHD2	XLOC_007175	0.549502	0.258708	0.32126
ABHD2	XLOC_008525	0.616323	0.192572	0.25861
ABHD2	XLOC_026943	0.965277	0.00178759	0.00779265
ABHD8	XLOC_002110	-0.759764	0.0796376	0.1333
ABHD8	XLOC_023728	-0.700892	0.120818	0.18265
ABHD8	XLOC_014188	-0.696221	0.124406	0.18676
ABHD8	XLOC_008525	-0.673352	0.142622	0.207185
ABHD8	XLOC_022303	-0.67237	0.143428	0.208075
ABHD8	XLOC_009668	-0.646394	0.165448	0.231325
ABHD8	XLOC_005817	-0.64617	0.165644	0.231528
ABHD8	XLOC_007175	-0.626559	0.183147	0.249222
ABHD8	XLOC_011827	-0.617049	0.191897	0.257951
ABHD8	XLOC_026943	-0.602135	0.205955	0.27173
ABHD8	XLOC_019454	-0.601521	0.206542	0.272296
ABHD8	XLOC_005292	-0.517778	0.292739	0.351583
ABHD8	XLOC_005034	-0.431527	0.392888	0.439296
ABHD8	XLOC_015932	-0.365969	0.475554	0.512435
ABHD8	XLOC_009932	0.273095	0.600541	0.626306
ABHD8	XLOC_020132	0.82244	0.0444922	0.0856287
ABHD8	XLOC_023491	0.836357	0.0379774	0.0757333
ABHD8	XLOC_014062	0.837345	0.0375333	0.0750422
ABHD8	XLOC_022241	0.849256	0.032373	0.0668369
ABHD8	XLOC_015281	0.973813	0.00101968	0.00551907
ABHD8	XLOC_013593	0.995583	2.92173e-05	0.00112868
ACADS	XLOC_002110	-0.913751	0.0108375	0.0282699
ACADS	XLOC_008525	-0.876635	0.0218895	0.0490707
ACADS	XLOC_023728	-0.874684	0.0225723	0.0502835
ACADS	XLOC_019454	-0.850088	0.0320257	0.0662763
ACADS	XLOC_014188	-0.847231	0.033225	0.0682088
ACADS	XLOC_022303	-0.816772	0.0472829	0.0897467
ACADS	XLOC_005817	-0.799362	0.0563447	0.102637
ACADS	XLOC_009668	-0.78398	0.0649565	0.11434
ACADS	XLOC_007175	-0.758209	0.0806264	0.134539
ACADS	XLOC_026943	-0.739265	0.0931115	0.149892
ACADS	XLOC_005292	-0.633582	0.176795	0.242843
ACADS	XLOC_005034	-0.62287	0.186522	0.252577
ACADS	XLOC_011827	-0.576969	0.230581	0.295231
ACADS	XLOC_015932	-0.457316	0.361847	0.41194
ACADS	XLOC_009932	0.685005	0.133206	0.196772
ACADS	XLOC_015281	0.760756	0.0790095	0.132511
ACADS	XLOC_013593	0.884329	0.0192957	0.0443909
ACADS	XLOC_022241	0.979685	0.000614879	0.00414361
ACADS	XLOC_023491	0.983721	0.000395331	0.00328261
ACADS	XLOC_020132	0.986138	0.000286889	0.00279869
ACADS	XLOC_014062	0.990201	0.000143552	0.00205066
ACAP1,ENSBTAG00000045892	XLOC_002110	-0.630691	0.179399	0.245457
ACAP1,ENSBTAG00000045892	XLOC_011827	-0.59068	0.217025	0.282373
ACAP1,ENSBTAG00000045892	XLOC_014188	-0.576029	0.231522	0.296108
ACAP1,ENSBTAG00000045892	XLOC_023728	-0.567524	0.24011	0.304194
ACAP1,ENSBTAG00000045892	XLOC_022303	-0.564979	0.242703	0.306602
ACAP1,ENSBTAG00000045892	XLOC_009668	-0.552629	0.255443	0.31829
ACAP1,ENSBTAG00000045892	XLOC_005817	-0.539999	0.268733	0.330321
ACAP1,ENSBTAG00000045892	XLOC_008525	-0.519029	0.291368	0.350386
ACAP1,ENSBTAG00000045892	XLOC_007175	-0.507439	0.304173	0.361564
ACAP1,ENSBTAG00000045892	XLOC_026943	-0.451002	0.369364	0.418595
ACAP1,ENSBTAG00000045892	XLOC_019454	-0.449221	0.371495	0.420486
ACAP1,ENSBTAG00000045892	XLOC_005292	-0.411376	0.417745	0.461227
ACAP1,ENSBTAG00000045892	XLOC_015932	-0.338269	0.51195	0.545004
ACAP1,ENSBTAG00000045892	XLOC_005034	-0.333513	0.518279	0.550704
ACAP1,ENSBTAG00000045892	XLOC_009932	0.0581977	0.912802	0.919059
ACAP1,ENSBTAG00000045892	XLOC_020132	0.67909	0.137951	0.202047
ACAP1,ENSBTAG00000045892	XLOC_014062	0.70056	0.121072	0.182936
ACAP1,ENSBTAG00000045892	XLOC_023491	0.706933	0.116247	0.17733
ACAP1,ENSBTAG00000045892	XLOC_022241	0.71152	0.112827	0.173357
ACAP1,ENSBTAG00000045892	XLOC_013593	0.968678	0.00145626	0.00684543
ACAP1,ENSBTAG00000045892	XLOC_015281	0.999112	1.18258e-06	0.000505461
ACAP2,XXYLT1	XLOC_014062	-0.802469	0.0546742	0.100314
ACAP2,XXYLT1	XLOC_020132	-0.802001	0.0549243	0.100664
ACAP2,XXYLT1	XLOC_022241	-0.77672	0.0692151	0.119961
ACAP2,XXYLT1	XLOC_023491	-0.70357	0.118782	0.180286
ACAP2,XXYLT1	XLOC_009932	-0.621288	0.187976	0.254037
ACAP2,XXYLT1	XLOC_013593	-0.535189	0.273863	0.334926
ACAP2,XXYLT1	XLOC_015281	-0.454732	0.364917	0.414643
ACAP2,XXYLT1	XLOC_005292	0.180294	0.732489	0.749969
ACAP2,XXYLT1	XLOC_007175	0.366829	0.474437	0.511445
ACAP2,XXYLT1	XLOC_015932	0.539308	0.269468	0.330979
ACAP2,XXYLT1	XLOC_026943	0.734613	0.0963001	0.153737
ACAP2,XXYLT1	XLOC_005034	0.757581	0.0810275	0.135053
ACAP2,XXYLT1	XLOC_011827	0.782378	0.0658858	0.115579
ACAP2,XXYLT1	XLOC_009668	0.832651	0.0396651	0.0783352
ACAP2,XXYLT1	XLOC_019454	0.852082	0.0312014	0.0649319
ACAP2,XXYLT1	XLOC_002110	0.887206	0.0183663	0.0426914
ACAP2,XXYLT1	XLOC_005817	0.90325	0.0135882	0.0336951
ACAP2,XXYLT1	XLOC_022303	0.907107	0.012543	0.0316556
ACAP2,XXYLT1	XLOC_008525	0.941037	0.00511254	0.0160246
ACAP2,XXYLT1	XLOC_023728	0.941324	0.00506337	0.0159113
ACAP2,XXYLT1	XLOC_014188	0.950032	0.00368283	0.0126587
ACCS	XLOC_026943	-0.919919	0.0093627	0.0252531
ACCS	XLOC_007175	-0.722818	0.104597	0.163635
ACCS	XLOC_005292	-0.696923	0.123864	0.186139
ACCS	XLOC_008525	-0.630255	0.179793	0.245849
ACCS	XLOC_002110	-0.585036	0.222565	0.287598
ACCS	XLOC_023728	-0.527034	0.282645	0.342722
ACCS	XLOC_014188	-0.470067	0.346833	0.398827
ACCS	XLOC_019454	-0.456919	0.362318	0.41235
ACCS	XLOC_022303	-0.368707	0.472002	0.509271
ACCS	XLOC_005817	-0.323861	0.531192	0.562407
ACCS	XLOC_009668	-0.271535	0.602708	0.628311
ACCS	XLOC_011827	-0.226089	0.666644	0.68805
ACCS	XLOC_005034	-0.0897375	0.865755	0.875185
ACCS	XLOC_015932	0.197876	0.70706	0.725987
ACCS	XLOC_009932	0.536281	0.272695	0.333881
ACCS	XLOC_015281	0.566318	0.241336	0.305336
ACCS	XLOC_013593	0.709484	0.114339	0.175128
ACCS	XLOC_023491	0.725086	0.102978	0.161708
ACCS	XLOC_014062	0.731347	0.0985668	0.156453
ACCS	XLOC_020132	0.755357	0.0824543	0.136814
ACCS	XLOC_022241	0.835982	0.0381468	0.0759998
ACOT11	XLOC_022241	-0.77519	0.0701284	0.121141
ACOT11	XLOC_020132	-0.691125	0.128372	0.191302
ACOT11	XLOC_014062	-0.660426	0.153388	0.218766
ACOT11	XLOC_023491	-0.619971	0.189191	0.255254
ACOT11	XLOC_013593	-0.566021	0.24164	0.30562
ACOT11	XLOC_009932	-0.544984	0.263456	0.325546
ACOT11	XLOC_015281	-0.422713	0.403697	0.448814
ACOT11	XLOC_011777	-0.415139	0.413064	0.536402
ACOT11	XLOC_003704	-0.410139	0.419287	0.538961
ACOT11	XLOC_015754	-0.392314	0.44172	0.550183
ACOT11	XLOC_015932	-0.334169	0.517405	0.598098
ACOT11	XLOC_017606	-0.301986	0.560791	0.627721
ACOT11	XLOC_015932	-0.250589	0.631984	0.655608
ACOT11	XLOC_009502	-0.206614	0.694489	0.732905
ACOT11	XLOC_005034	0.0881273	0.868151	0.877425
ACOT11	XLOC_009668	0.240127	0.646732	0.669426
ACOT11	XLOC_011827	0.254476	0.626526	0.650537
ACOT11	XLOC_005817	0.318883	0.537889	0.5685
ACOT11	XLOC_022303	0.363057	0.479342	0.515795
ACOT11	XLOC_023658	0.40849	0.421346	0.53986
ACOT11	XLOC_019454	0.439465	0.383239	0.430767
ACOT11	XLOC_005053	0.475834	0.340118	0.526098
ACOT11	XLOC_002110	0.47966	0.335688	0.526098
ACOT11	XLOC_014188	0.480789	0.334386	0.387925
ACOT11	XLOC_011194	0.518866	0.291546	0.526098
ACOT11	XLOC_005292	0.531979	0.277306	0.526098
ACOT11	XLOC_023728	0.532392	0.276863	0.3376
ACOT11	XLOC_019584	0.55714	0.250759	0.526098
ACOT11	XLOC_002110	0.559643	0.248176	0.311679
ACOT11	XLOC_005292	0.573208	0.234357	0.298774
ACOT11	XLOC_007175	0.609745	0.198731	0.264668
ACOT11	XLOC_008525	0.65345	0.159336	0.225036
ACOT11	XLOC_026943	0.968044	0.0015155	0.00730171
ACOT11	XLOC_026943	0.974567	0.00096207	0.00533353
ACOT7	XLOC_009668	-0.819831	0.0457673	0.0875168
ACOT7	XLOC_002110	-0.80986	0.0507926	0.0948166
ACOT7	XLOC_022303	-0.79745	0.0573846	0.104077
ACOT7	XLOC_011827	-0.794723	0.058883	0.106142
ACOT7	XLOC_005817	-0.771376	0.0724285	0.124125
ACOT7	XLOC_014188	-0.768193	0.0743739	0.126621
ACOT7	XLOC_023728	-0.755506	0.0823582	0.136695
ACOT7	XLOC_019454	-0.698348	0.122767	0.184874
ACOT7	XLOC_005034	-0.685144	0.133095	0.196643
ACOT7	XLOC_015932	-0.681689	0.135856	0.199736
ACOT7	XLOC_008525	-0.681041	0.136378	0.2003
ACOT7	XLOC_007175	-0.59968	0.208308	0.274006
ACOT7	XLOC_005292	-0.46428	0.353619	0.40476
ACOT7	XLOC_026943	-0.370561	0.469601	0.507146
ACOT7	XLOC_009932	0.238285	0.649338	0.671852
ACOT7	XLOC_023491	0.740908	0.0919971	0.14854
ACOT7	XLOC_022241	0.748841	0.0866998	0.142081
ACOT7	XLOC_020132	0.767084	0.0750572	0.127507
ACOT7	XLOC_014062	0.78944	0.0618358	0.11017
ACOT7	XLOC_013593	0.874367	0.0226838	0.0504765
ACOT7	XLOC_015281	0.88767	0.0182185	0.0424168
ACOT8	XLOC_026943	-0.858457	0.0286338	0.0606771
ACOT8	XLOC_008525	-0.833804	0.0391362	0.0775226
ACOT8	XLOC_002110	-0.823975	0.04375	0.0845102
ACOT8	XLOC_023728	-0.782506	0.0658114	0.115481
ACOT8	XLOC_007175	-0.782364	0.0658939	0.11559
ACOT8	XLOC_019454	-0.76073	0.0790263	0.13253
ACOT8	XLOC_014188	-0.735691	0.0955567	0.152846
ACOT8	XLOC_005292	-0.693849	0.126245	0.188864
ACOT8	XLOC_022303	-0.672831	0.143049	0.207652
ACOT8	XLOC_005817	-0.648906	0.163261	0.229097
ACOT8	XLOC_009668	-0.611151	0.197408	0.263374
ACOT8	XLOC_005034	-0.44885	0.371939	0.420864
ACOT8	XLOC_011827	-0.405574	0.424995	0.46764
ACOT8	XLOC_015932	-0.208573	0.691677	0.711539
ACOT8	XLOC_015281	0.636307	0.174355	0.240367
ACOT8	XLOC_009932	0.749627	0.0861826	0.141444
ACOT8	XLOC_013593	0.800066	0.0559645	0.102108
ACOT8	XLOC_014062	0.939665	0.0053506	0.0165684
ACOT8	XLOC_023491	0.940748	0.00516215	0.0161407
ACOT8	XLOC_020132	0.949267	0.00379546	0.0129307
ACOT8	XLOC_022241	0.96911	0.00141657	0.00672989
ACOX2	XLOC_011777	-0.498041	0.314706	0.526098
ACOX2	XLOC_026943	-0.384404	0.451796	0.555832
ACOX2	XLOC_005292	-0.143113	0.786797	0.813157
ACOX2	XLOC_019584	0.22347	0.670375	0.712632
ACOX2	XLOC_011194	0.294338	0.571242	0.63497
ACOX2	XLOC_002110	0.322326	0.533255	0.608914
ACOX2	XLOC_003704	0.345271	0.502674	0.587975
ACOX2	XLOC_005053	0.353773	0.491478	0.58082
ACOX2	XLOC_023658	0.381852	0.455061	0.557463
ACOX2	XLOC_017606	0.418906	0.408397	0.535039
ACOX2	XLOC_009502	0.544427	0.264044	0.526098
ACOX2	XLOC_015754	0.727437	0.101311	0.286731
ACOX2	XLOC_015932	0.807306	0.0521189	0.154838
ACOX2	XLOC_009502	0.993102	7.12179e-05	0.00498514
ACSL4	XLOC_022241	-0.690598	0.128785	0.191769
ACSL4	XLOC_020132	-0.597452	0.210452	0.276084
ACSL4	XLOC_014062	-0.561156	0.246619	0.310248
ACSL4	XLOC_023491	-0.496027	0.316981	0.372751
ACSL4	XLOC_009932	-0.48551	0.328957	0.383194
ACSL4	XLOC_013593	-0.453286	0.366639	0.416181
ACSL4	XLOC_015932	-0.325233	0.529351	0.560742
ACSL4	XLOC_015281	-0.320891	0.535185	0.566032
ACSL4	XLOC_005034	0.035049	0.947448	0.951266
ACSL4	XLOC_009668	0.162439	0.758484	0.77457
ACSL4	XLOC_011827	0.24271	0.643084	0.666017
ACSL4	XLOC_005817	0.24461	0.640403	0.663504
ACSL4	XLOC_022303	0.294696	0.570752	0.598693
ACSL4	XLOC_019454	0.364745	0.477145	0.513846
ACSL4	XLOC_014188	0.418458	0.40895	0.453438
ACSL4	XLOC_023728	0.468324	0.348872	0.400605
ACSL4	XLOC_002110	0.488366	0.325689	0.380341
ACSL4	XLOC_005292	0.521592	0.288563	0.347916
ACSL4	XLOC_007175	0.547941	0.260345	0.322739
ACSL4	XLOC_008525	0.602519	0.205587	0.271371
ACSL4	XLOC_026943	0.962882	0.00204105	0.00848598
ACTN4	XLOC_022241	-0.677576	0.139177	0.203411
ACTN4	XLOC_020132	-0.585953	0.221661	0.286745
ACTN4	XLOC_014062	-0.546064	0.262318	0.324516
ACTN4	XLOC_009932	-0.533621	0.275544	0.336431
ACTN4	XLOC_023491	-0.495021	0.31812	0.373737
ACTN4	XLOC_013593	-0.419459	0.407713	0.452348
ACTN4	XLOC_015932	-0.366165	0.475299	0.512203
ACTN4	XLOC_015281	-0.263969	0.613243	0.638109
ACTN4	XLOC_005034	-0.00455965	0.993161	0.993661
ACTN4	XLOC_009668	0.109294	0.836712	0.848098
ACTN4	XLOC_011827	0.138399	0.793727	0.807799
ACTN4	XLOC_005817	0.174734	0.740567	0.7576
ACTN4	XLOC_022303	0.228189	0.663657	0.685259
ACTN4	XLOC_019454	0.344561	0.503612	0.5375
ACTN4	XLOC_014188	0.346098	0.501581	0.535674
ACTN4	XLOC_023728	0.409018	0.420687	0.463858
ACTN4	XLOC_002110	0.447381	0.373701	0.422402
ACTN4	XLOC_008525	0.552971	0.255087	0.317967
ACTN4	XLOC_005292	0.623962	0.18552	0.251588
ACTN4	XLOC_007175	0.624239	0.185266	0.25134
ACTN4	XLOC_026943	0.925996	0.00801222	0.0224244
ACTR2	XLOC_022241	-0.619366	0.18975	0.255809
ACTR2	XLOC_020132	-0.537512	0.271381	0.332711
ACTR2	XLOC_009932	-0.521718	0.288426	0.347797
ACTR2	XLOC_014062	-0.498773	0.313881	0.370032
ACTR2	XLOC_023491	-0.421792	0.404832	0.449821
ACTR2	XLOC_015932	-0.319788	0.53667	0.567392
ACTR2	XLOC_013593	-0.314417	0.543916	0.573996
ACTR2	XLOC_015281	-0.174628	0.740721	0.757742
ACTR2	XLOC_005034	0.0561547	0.915856	0.921898
ACTR2	XLOC_009668	0.148924	0.778266	0.793242
ACTR2	XLOC_011827	0.222651	0.671542	0.69265
ACTR2	XLOC_005817	0.244608	0.640406	0.663506
ACTR2	XLOC_022303	0.287333	0.580861	0.608069
ACTR2	XLOC_019454	0.362931	0.479506	0.515939
ACTR2	XLOC_014188	0.41259	0.416233	0.459881
ACTR2	XLOC_005292	0.419061	0.408205	0.452782
ACTR2	XLOC_007175	0.451978	0.368199	0.417574
ACTR2	XLOC_002110	0.455044	0.364546	0.414323
ACTR2	XLOC_023728	0.459093	0.359742	0.410103
ACTR2	XLOC_008525	0.59771	0.210203	0.275838
ACTR2	XLOC_026943	0.939496	0.00538041	0.0166383
ACTR3	XLOC_022241	-0.702714	0.119432	0.181036
ACTR3	XLOC_020132	-0.616208	0.192679	0.258715
ACTR3	XLOC_014062	-0.58166	0.225906	0.290774
ACTR3	XLOC_023491	-0.510174	0.301132	0.358903
ACTR3	XLOC_009932	-0.5035	0.308572	0.365428
ACTR3	XLOC_013593	-0.453239	0.366695	0.416232
ACTR3	XLOC_015281	-0.323219	0.532055	0.563197
ACTR3	XLOC_015932	-0.274224	0.598975	0.624839
ACTR3	XLOC_005034	0.0873854	0.869256	0.878462
ACTR3	XLOC_009668	0.212255	0.686399	0.706584
ACTR3	XLOC_011827	0.2919	0.574585	0.602243
ACTR3	XLOC_005817	0.301328	0.561689	0.590317
ACTR3	XLOC_022303	0.347512	0.499715	0.533999
ACTR3	XLOC_019454	0.40496	0.425765	0.468318
ACTR3	XLOC_014188	0.470757	0.346028	0.398124
ACTR3	XLOC_005292	0.477271	0.338451	0.391479
ACTR3	XLOC_023728	0.515513	0.29523	0.353791
ACTR3	XLOC_007175	0.519362	0.291002	0.350063
ACTR3	XLOC_002110	0.524252	0.285665	0.345383
ACTR3	XLOC_008525	0.643658	0.167845	0.233762
ACTR3	XLOC_026943	0.973997	0.00100543	0.00547394
ACVR1B	XLOC_022241	-0.743329	0.0903653	0.146544
ACVR1B	XLOC_020132	-0.653359	0.159414	0.225119
ACVR1B	XLOC_014062	-0.617683	0.191308	0.257359
ACVR1B	XLOC_023491	-0.553229	0.254818	0.317719
ACVR1B	XLOC_009932	-0.521265	0.288921	0.348227
ACVR1B	XLOC_013593	-0.509218	0.302194	0.359824
ACVR1B	XLOC_003704	-0.463201	0.35489	0.526098
ACVR1B	XLOC_015754	-0.437733	0.385338	0.529519
ACVR1B	XLOC_011777	-0.378453	0.459422	0.560263
ACVR1B	XLOC_015281	-0.369918	0.470433	0.507878
ACVR1B	XLOC_017606	-0.367238	0.473906	0.569158
ACVR1B	XLOC_015932	-0.335102	0.516162	0.597391
ACVR1B	XLOC_015932	-0.277614	0.594276	0.620471
ACVR1B	XLOC_009502	-0.276017	0.596489	0.653778
ACVR1B	XLOC_005034	0.0807336	0.879163	0.887726
ACVR1B	XLOC_009668	0.211612	0.68732	0.707447
ACVR1B	XLOC_011827	0.269439	0.605622	0.631023
ACVR1B	XLOC_005817	0.280782	0.589896	0.616429
ACVR1B	XLOC_022303	0.334643	0.516774	0.549371
ACVR1B	XLOC_023658	0.403742	0.427293	0.542702
ACVR1B	XLOC_019454	0.414764	0.413529	0.457489
ACVR1B	XLOC_014188	0.451746	0.368476	0.41782
ACVR1B	XLOC_005053	0.473852	0.342421	0.526098
ACVR1B	XLOC_002110	0.481342	0.333748	0.526098
ACVR1B	XLOC_023728	0.505521	0.306312	0.36344
ACVR1B	XLOC_011194	0.508383	0.303122	0.526098
ACVR1B	XLOC_002110	0.538224	0.270621	0.332012
ACVR1B	XLOC_019584	0.567284	0.240353	0.526098
ACVR1B	XLOC_005292	0.571833	0.235743	0.526098
ACVR1B	XLOC_005292	0.602663	0.20545	0.271235
ACVR1B	XLOC_007175	0.629561	0.180421	0.246484
ACVR1B	XLOC_008525	0.636076	0.174562	0.240578
ACVR1B	XLOC_026943	0.96168	0.00217452	0.00956549
ACVR1B	XLOC_026943	0.969556	0.00137615	0.00661018
ADA	XLOC_002110	-0.797656	0.0572726	0.103923
ADA	XLOC_014188	-0.741145	0.0918366	0.148348
ADA	XLOC_023728	-0.739122	0.0932085	0.150005
ADA	XLOC_011827	-0.730144	0.0994079	0.157457
ADA	XLOC_022303	-0.728766	0.100375	0.158603
ADA	XLOC_009668	-0.710083	0.113893	0.174605
ADA	XLOC_008525	-0.702657	0.119475	0.181087
ADA	XLOC_005817	-0.695187	0.125206	0.187677
ADA	XLOC_019454	-0.636313	0.17435	0.240362
ADA	XLOC_007175	-0.63505	0.175479	0.241506
ADA	XLOC_026943	-0.572727	0.234841	0.299232
ADA	XLOC_005034	-0.519608	0.290733	0.349816
ADA	XLOC_005292	-0.514637	0.296196	0.354621
ADA	XLOC_015932	-0.453084	0.36688	0.41639
ADA	XLOC_009932	0.240806	0.645773	0.668524
ADA	XLOC_023491	0.792577	0.0600744	0.107774
ADA	XLOC_020132	0.813897	0.0487289	0.0918409
ADA	XLOC_014062	0.828601	0.0415486	0.0811944
ADA	XLOC_022241	0.835179	0.0385102	0.0765607
ADA	XLOC_015281	0.966261	0.00168825	0.0075136
ADA	XLOC_013593	0.96945	0.00138573	0.0066374
ADAM17	XLOC_022241	-0.654859	0.158126	0.223772
ADAM17	XLOC_020132	-0.56294	0.244789	0.308552
ADAM17	XLOC_014062	-0.523339	0.286658	0.346248
ADAM17	XLOC_009932	-0.500083	0.312406	0.368753
ADAM17	XLOC_023491	-0.451707	0.368523	0.41786
ADAM17	XLOC_013593	-0.384775	0.451321	0.490965
ADAM17	XLOC_015932	-0.348908	0.497876	0.532344
ADAM17	XLOC_015281	-0.245266	0.639478	0.662637
ADAM17	XLOC_005034	0.0230326	0.965457	0.968013
ADAM17	XLOC_009668	0.130969	0.80467	0.818099
ADAM17	XLOC_011827	0.210068	0.689534	0.709519
ADAM17	XLOC_005817	0.210892	0.688352	0.708419
ADAM17	XLOC_022303	0.262489	0.615309	0.64003
ADAM17	XLOC_019454	0.347453	0.499794	0.534065
ADAM17	XLOC_014188	0.385863	0.449931	0.48974
ADAM17	XLOC_023728	0.438886	0.383941	0.43139
ADAM17	XLOC_002110	0.457857	0.361205	0.411385
ADAM17	XLOC_005292	0.52434	0.285569	0.345297
ADAM17	XLOC_007175	0.542346	0.266243	0.328076
ADAM17	XLOC_008525	0.580584	0.226975	0.291795
ADAM17	XLOC_026943	0.946781	0.004173	0.0138324
ADAM19	XLOC_022241	-0.756837	0.0815035	0.135633
ADAM19	XLOC_020132	-0.667591	0.147379	0.212353
ADAM19	XLOC_014062	-0.633712	0.176679	0.242728
ADAM19	XLOC_023491	-0.571592	0.235987	0.300312
ADAM19	XLOC_013593	-0.534903	0.274169	0.335203
ADAM19	XLOC_009932	-0.516288	0.294377	0.353051
ADAM19	XLOC_011777	-0.51542	0.295332	0.526098
ADAM19	XLOC_015281	-0.399363	0.432802	0.47454
ADAM19	XLOC_003704	-0.389991	0.444671	0.551704
ADAM19	XLOC_015754	-0.306453	0.55471	0.623596
ADAM19	XLOC_017606	-0.271573	0.602655	0.65851
ADAM19	XLOC_015932	-0.260984	0.617412	0.641994
ADAM19	XLOC_015932	-0.255446	0.625165	0.675786
ADAM19	XLOC_009502	-0.153092	0.772155	0.800042
ADAM19	XLOC_005034	0.0918901	0.862553	0.872202
ADAM19	XLOC_009668	0.230513	0.660355	0.68215
ADAM19	XLOC_011827	0.288646	0.579056	0.606407
ADAM19	XLOC_005817	0.302679	0.559846	0.588612
ADAM19	XLOC_022303	0.354702	0.49026	0.525515
ADAM19	XLOC_019454	0.425848	0.39984	0.445423
ADAM19	XLOC_014188	0.472117	0.344441	0.396742
ADAM19	XLOC_023658	0.482302	0.332642	0.526098
ADAM19	XLOC_023728	0.523391	0.286602	0.346197
ADAM19	XLOC_002110	0.553715	0.254312	0.317256
ADAM19	XLOC_002110	0.555863	0.252082	0.526098
ADAM19	XLOC_005053	0.556446	0.251478	0.526098
ADAM19	XLOC_011194	0.581442	0.226122	0.526098
ADAM19	XLOC_005292	0.587836	0.219809	0.285001
ADAM19	XLOC_005292	0.589288	0.218386	0.526098
ADAM19	XLOC_007175	0.62098	0.18826	0.254321
ADAM19	XLOC_019584	0.633426	0.176935	0.468739
ADAM19	XLOC_008525	0.649632	0.162631	0.228453
ADAM19	XLOC_026943	0.975611	0.000884954	0.0049743
ADAM19	XLOC_026943	0.976432	0.00082665	0.00488337
ADCK2	XLOC_002110	-0.889252	0.0177185	0.0414984
ADCK2	XLOC_023728	-0.835666	0.0382895	0.0762204
ADCK2	XLOC_014188	-0.824349	0.0435703	0.0842453
ADCK2	XLOC_008525	-0.817446	0.0469469	0.0892539
ADCK2	XLOC_022303	-0.803911	0.0539064	0.0992358
ADCK2	XLOC_009668	-0.777815	0.0685651	0.119104
ADCK2	XLOC_005817	-0.772313	0.0718599	0.123382
ADCK2	XLOC_019454	-0.763186	0.077481	0.130569
ADCK2	XLOC_007175	-0.729213	0.100061	0.158231
ADCK2	XLOC_011827	-0.7142	0.11085	0.171039
ADCK2	XLOC_026943	-0.676258	0.140248	0.204581
ADCK2	XLOC_005292	-0.60216	0.20593	0.271707
ADCK2	XLOC_005034	-0.600392	0.207623	0.27334
ADCK2	XLOC_015932	-0.477501	0.338185	0.391241
ADCK2	XLOC_009932	0.447296	0.373803	0.422491
ADCK2	XLOC_023491	0.894683	0.0160535	0.0384041
ADCK2	XLOC_015281	0.902129	0.0138995	0.0342962
ADCK2	XLOC_020132	0.921732	0.00894908	0.024392
ADCK2	XLOC_014062	0.930603	0.00705684	0.0203701
ADCK2	XLOC_022241	0.932773	0.00662735	0.0194282
ADCK2	XLOC_013593	0.957779	0.00263633	0.0100517
ADGRE1,ENSBTAG00000038981,VAV1	XLOC_022241	-0.779774	0.0674088	0.117598
ADGRE1,ENSBTAG00000038981,VAV1	XLOC_020132	-0.688993	0.130047	0.193215
ADGRE1,ENSBTAG00000038981,VAV1	XLOC_014062	-0.655297	0.157752	0.223388
ADGRE1,ENSBTAG00000038981,VAV1	XLOC_023491	-0.593611	0.21417	0.279661
ADGRE1,ENSBTAG00000038981,VAV1	XLOC_013593	-0.574438	0.23312	0.297605
ADGRE1,ENSBTAG00000038981,VAV1	XLOC_009932	-0.512	0.299108	0.357133
ADGRE1,ENSBTAG00000038981,VAV1	XLOC_015281	-0.439373	0.383351	0.430865
ADGRE1,ENSBTAG00000038981,VAV1	XLOC_015932	-0.246848	0.637249	0.660547
ADGRE1,ENSBTAG00000038981,VAV1	XLOC_005034	0.0998491	0.850724	0.861153
ADGRE1,ENSBTAG00000038981,VAV1	XLOC_009668	0.242156	0.643866	0.66675
ADGRE1,ENSBTAG00000038981,VAV1	XLOC_011827	0.297445	0.566991	0.595208
ADGRE1,ENSBTAG00000038981,VAV1	XLOC_005817	0.301167	0.561907	0.59052
ADGRE1,ENSBTAG00000038981,VAV1	XLOC_022303	0.358178	0.485708	0.521451
ADGRE1,ENSBTAG00000038981,VAV1	XLOC_019454	0.434653	0.389078	0.435928
ADGRE1,ENSBTAG00000038981,VAV1	XLOC_014188	0.470189	0.346691	0.398705
ADGRE1,ENSBTAG00000038981,VAV1	XLOC_023728	0.52452	0.285374	0.345129
ADGRE1,ENSBTAG00000038981,VAV1	XLOC_002110	0.568488	0.239129	0.303265
ADGRE1,ENSBTAG00000038981,VAV1	XLOC_008525	0.648731	0.163413	0.229251
ADGRE1,ENSBTAG00000038981,VAV1	XLOC_005292	0.653314	0.159453	0.225156
ADGRE1,ENSBTAG00000038981,VAV1	XLOC_007175	0.680811	0.136563	0.200501
ADGRE1,ENSBTAG00000038981,VAV1	XLOC_026943	0.967879	0.00153108	0.00706278
ADGRF1	XLOC_011777	-0.458911	0.359957	0.526098
ADGRF1	XLOC_026943	-0.452453	0.367632	0.526552
ADGRF1	XLOC_005292	-0.277287	0.59473	0.652378
ADGRF1	XLOC_019584	0.0353282	0.94703	0.953896
ADGRF1	XLOC_011194	0.116397	0.826193	0.847892
ADGRF1	XLOC_002110	0.128092	0.808913	0.832804
ADGRF1	XLOC_005053	0.169041	0.748854	0.779594
ADGRF1	XLOC_023658	0.204347	0.697746	0.735768
ADGRF1	XLOC_003704	0.583547	0.224036	0.526098
ADGRF1	XLOC_015932	0.618452	0.190596	0.493419
ADGRF1	XLOC_017606	0.643451	0.168027	0.450204
ADGRF1	XLOC_009502	0.73137	0.0985506	0.279618
ADGRF1	XLOC_015754	0.870054	0.0242318	0.0764921
ADGRG3	XLOC_022241	-0.731122	0.098724	0.156642
ADGRG3	XLOC_020132	-0.640541	0.170594	0.236541
ADGRG3	XLOC_014062	-0.602544	0.205564	0.271348
ADGRG3	XLOC_023491	-0.54167	0.266959	0.328714
ADGRG3	XLOC_009932	-0.535129	0.273927	0.334983
ADGRG3	XLOC_011777	-0.499962	0.312543	0.526098
ADGRG3	XLOC_013593	-0.48757	0.326599	0.38114
ADGRG3	XLOC_003704	-0.411637	0.417419	0.53819
ADGRG3	XLOC_015754	-0.34006	0.509573	0.592756
ADGRG3	XLOC_015281	-0.339002	0.510976	0.544126
ADGRG3	XLOC_015932	-0.302148	0.56057	0.589279
ADGRG3	XLOC_017606	-0.296613	0.568129	0.632714
ADGRG3	XLOC_015932	-0.268291	0.607219	0.662024
ADGRG3	XLOC_009502	-0.180753	0.731823	0.765081
ADGRG3	XLOC_005034	0.0577306	0.9135	0.919709
ADGRG3	XLOC_009668	0.179681	0.733379	0.75082
ADGRG3	XLOC_011827	0.220917	0.674016	0.694968
ADGRG3	XLOC_005817	0.238152	0.649526	0.672026
ADGRG3	XLOC_022303	0.295474	0.569687	0.597705
ADGRG3	XLOC_019454	0.397826	0.434742	0.476283
ADGRG3	XLOC_014188	0.40911	0.420571	0.463755
ADGRG3	XLOC_023658	0.447204	0.373913	0.527391
ADGRG3	XLOC_023728	0.469474	0.347526	0.399431
ADGRG3	XLOC_002110	0.51307	0.297925	0.356122
ADGRG3	XLOC_002110	0.544257	0.264224	0.526098
ADGRG3	XLOC_005053	0.545224	0.263203	0.526098
ADGRG3	XLOC_011194	0.552767	0.255298	0.526098
ADGRG3	XLOC_008525	0.605631	0.202623	0.268487
ADGRG3	XLOC_019584	0.622446	0.186911	0.487456
ADGRG3	XLOC_005292	0.659271	0.154366	0.219804
ADGRG3	XLOC_007175	0.67129	0.144317	0.209026
ADGRG3	XLOC_005292	0.672042	0.143697	0.394433
ADGRG3	XLOC_026943	0.94747	0.0040666	0.0135794
ADGRG3	XLOC_026943	0.954966	0.00299643	0.0123295
ADI1	XLOC_026943	-0.749765	0.086092	0.141331
ADI1	XLOC_008525	-0.587341	0.220296	0.28547
ADI1	XLOC_007175	-0.577577	0.229973	0.294652
ADI1	XLOC_005292	-0.559108	0.248727	0.312183
ADI1	XLOC_019454	-0.530635	0.278754	0.339283
ADI1	XLOC_002110	-0.481619	0.333429	0.387084
ADI1	XLOC_023728	-0.47322	0.343156	0.395622
ADI1	XLOC_014188	-0.402533	0.428813	0.470996
ADI1	XLOC_022303	-0.320068	0.536293	0.567046
ADI1	XLOC_005817	-0.309883	0.550054	0.579614
ADI1	XLOC_009668	-0.243566	0.641875	0.664883
ADI1	XLOC_005034	-0.188758	0.720226	0.738408
ADI1	XLOC_015281	0.0319836	0.952041	0.955543
ADI1	XLOC_011827	0.0446437	0.933079	0.937883
ADI1	XLOC_015932	0.118557	0.822998	0.835287
ADI1	XLOC_013593	0.265885	0.610571	0.635625
ADI1	XLOC_014062	0.607771	0.200594	0.266511
ADI1	XLOC_023491	0.625479	0.184133	0.2502
ADI1	XLOC_020132	0.638093	0.172764	0.238745
ADI1	XLOC_022241	0.652039	0.16055	0.226287
ADI1	XLOC_009932	0.867974	0.0249956	0.0544935
ADIRF	XLOC_019454	-0.606866	0.201451	0.267348
ADIRF	XLOC_008525	-0.551162	0.256973	0.319685
ADIRF	XLOC_026943	-0.487886	0.326238	0.380832
ADIRF	XLOC_023728	-0.477447	0.338247	0.391295
ADIRF	XLOC_002110	-0.451546	0.368714	0.418022
ADIRF	XLOC_007175	-0.421114	0.405669	0.450566
ADIRF	XLOC_014188	-0.419881	0.407191	0.45189
ADIRF	XLOC_005817	-0.397573	0.435061	0.476565
ADIRF	XLOC_005034	-0.384668	0.451458	0.491092
ADIRF	XLOC_022303	-0.382284	0.454507	0.493814
ADIRF	XLOC_005292	-0.379351	0.45827	0.497131
ADIRF	XLOC_009668	-0.347459	0.499786	0.534059
ADIRF	XLOC_015281	-0.220556	0.674531	0.695453
ADIRF	XLOC_015932	-0.143413	0.786355	0.800874
ADIRF	XLOC_013593	0.0170657	0.974404	0.976293
ADIRF	XLOC_011827	0.0566962	0.915047	0.921141
ADIRF	XLOC_022241	0.485644	0.328803	0.383065
ADIRF	XLOC_014062	0.513202	0.29778	0.355999
ADIRF	XLOC_023491	0.529328	0.280164	0.340525
ADIRF	XLOC_020132	0.53523	0.273819	0.334889
ADIRF	XLOC_009932	0.94971	0.00373006	0.0127706
ADNP	XLOC_022241	-0.730931	0.0988569	0.156793
ADNP	XLOC_020132	-0.66394	0.150428	0.215624
ADNP	XLOC_014062	-0.63032	0.179734	0.245786
ADNP	XLOC_009932	-0.597134	0.210759	0.276387
ADNP	XLOC_023491	-0.545748	0.262651	0.324817
ADNP	XLOC_013593	-0.422903	0.403463	0.448604
ADNP	XLOC_015281	-0.280298	0.590564	0.617042
ADNP	XLOC_015932	-0.157344	0.765931	0.781606
ADNP	XLOC_005034	0.214481	0.683211	0.703595
ADNP	XLOC_009668	0.316455	0.541164	0.571496
ADNP	XLOC_011827	0.359185	0.484392	0.520282
ADNP	XLOC_005817	0.406974	0.423242	0.466104
ADNP	XLOC_022303	0.447902	0.373075	0.421857
ADNP	XLOC_005292	0.456967	0.362262	0.4123
ADNP	XLOC_019454	0.509728	0.301628	0.35934
ADNP	XLOC_007175	0.521172	0.289022	0.348316
ADNP	XLOC_014188	0.56357	0.244143	0.307951
ADNP	XLOC_002110	0.600434	0.207584	0.273303
ADNP	XLOC_023728	0.605586	0.202666	0.268529
ADNP	XLOC_008525	0.726062	0.102285	0.160886
ADNP	XLOC_026943	0.977873	0.000729004	0.00455118
ADNP2	XLOC_022241	-0.731232	0.0986473	0.156551
ADNP2	XLOC_020132	-0.660952	0.152943	0.218298
ADNP2	XLOC_014062	-0.631268	0.178878	0.244935
ADNP2	XLOC_023491	-0.565976	0.241685	0.30566
ADNP2	XLOC_009932	-0.560733	0.247054	0.31065
ADNP2	XLOC_013593	-0.467002	0.350421	0.401966
ADNP2	XLOC_015281	-0.332636	0.519449	0.551765
ADNP2	XLOC_015932	-0.180253	0.732548	0.750024
ADNP2	XLOC_005034	0.171843	0.744773	0.761577
ADNP2	XLOC_009668	0.298073	0.566132	0.594416
ADNP2	XLOC_011827	0.337021	0.513608	0.546512
ADNP2	XLOC_005817	0.399725	0.432347	0.474136
ADNP2	XLOC_005292	0.406576	0.42374	0.46654
ADNP2	XLOC_022303	0.43416	0.389678	0.43647
ADNP2	XLOC_007175	0.474002	0.342246	0.39482
ADNP2	XLOC_019454	0.480853	0.334312	0.387856
ADNP2	XLOC_014188	0.554549	0.253445	0.31646
ADNP2	XLOC_002110	0.582863	0.224714	0.289636
ADNP2	XLOC_023728	0.592581	0.215171	0.280622
ADNP2	XLOC_008525	0.707195	0.11605	0.177108
ADNP2	XLOC_026943	0.979372	0.000633879	0.00421366
ADPRHL2	XLOC_026943	-0.864375	0.0263439	0.0568164
ADPRHL2	XLOC_002110	-0.780749	0.0668369	0.116845
ADPRHL2	XLOC_007175	-0.774996	0.0702448	0.121295
ADPRHL2	XLOC_008525	-0.767707	0.0746726	0.127007
ADPRHL2	XLOC_023728	-0.720321	0.106392	0.16579
ADPRHL2	XLOC_005292	-0.695582	0.1249	0.187326
ADPRHL2	XLOC_014188	-0.682821	0.13495	0.198734
ADPRHL2	XLOC_019454	-0.641095	0.170103	0.236037
ADPRHL2	XLOC_022303	-0.614373	0.194389	0.260391
ADPRHL2	XLOC_005817	-0.57437	0.233188	0.297667
ADPRHL2	XLOC_009668	-0.545886	0.262505	0.324684
ADPRHL2	XLOC_011827	-0.483844	0.33087	0.384864
ADPRHL2	XLOC_005034	-0.345512	0.502356	0.536375
ADPRHL2	XLOC_015932	-0.126346	0.811489	0.824509
ADPRHL2	XLOC_009932	0.523604	0.28637	0.345999
ADPRHL2	XLOC_015281	0.797878	0.0571511	0.103754
ADPRHL2	XLOC_023491	0.875807	0.0221779	0.0495866
ADPRHL2	XLOC_014062	0.891445	0.0170367	0.0402409
ADPRHL2	XLOC_020132	0.899402	0.014671	0.0357763
ADPRHL2	XLOC_013593	0.905797	0.0128932	0.0323433
ADPRHL2	XLOC_022241	0.951452	0.00347815	0.0121569
ADRB1	XLOC_002110	-0.932413	0.00669763	0.019581
ADRB1	XLOC_019454	-0.896289	0.0155762	0.0374957
ADRB1	XLOC_023728	-0.894371	0.0161468	0.0385783
ADRB1	XLOC_014188	-0.872794	0.023243	0.051461
ADRB1	XLOC_008525	-0.872583	0.0233182	0.0515939
ADRB1	XLOC_022303	-0.866594	0.0255086	0.05538
ADRB1	XLOC_009668	-0.858272	0.0287069	0.0608033
ADRB1	XLOC_005817	-0.854347	0.0302773	0.0634044
ADRB1	XLOC_007175	-0.748112	0.0871807	0.142667
ADRB1	XLOC_005034	-0.723442	0.104151	0.163108
ADRB1	XLOC_026943	-0.628103	0.181743	0.247813
ADRB1	XLOC_011827	-0.61613	0.192752	0.258787
ADRB1	XLOC_005292	-0.613273	0.195417	0.261402
ADRB1	XLOC_015932	-0.597473	0.210432	0.276063
ADRB1	XLOC_009932	0.690916	0.128536	0.191484
ADRB1	XLOC_015281	0.736841	0.0947671	0.151883
ADRB1	XLOC_013593	0.852288	0.0311167	0.0647912
ADRB1	XLOC_022241	0.945769	0.00433182	0.0142056
ADRB1	XLOC_020132	0.975585	0.000886875	0.00508459
ADRB1	XLOC_023491	0.975788	0.000872262	0.00503597
ADRB1	XLOC_014062	0.984989	0.000336316	0.00302564
AEBP2	XLOC_022241	-0.780047	0.0672484	0.117387
AEBP2	XLOC_020132	-0.747726	0.0874353	0.142977
AEBP2	XLOC_014062	-0.728875	0.100298	0.158513
AEBP2	XLOC_023491	-0.643739	0.167774	0.233689
AEBP2	XLOC_009932	-0.625078	0.184499	0.25057
AEBP2	XLOC_013593	-0.496512	0.316433	0.372278
AEBP2	XLOC_015281	-0.376556	0.461863	0.500267
AEBP2	XLOC_015932	0.110211	0.835353	0.846828
AEBP2	XLOC_005292	0.293845	0.571919	0.599774
AEBP2	XLOC_007175	0.420096	0.406926	0.45165
AEBP2	XLOC_005034	0.431201	0.393286	0.439657
AEBP2	XLOC_009668	0.539379	0.269392	0.330914
AEBP2	XLOC_011827	0.544759	0.263694	0.325766
AEBP2	XLOC_005817	0.641797	0.169483	0.235414
AEBP2	XLOC_022303	0.662308	0.151799	0.217087
AEBP2	XLOC_019454	0.665281	0.149304	0.214425
AEBP2	XLOC_002110	0.740346	0.0923771	0.149007
AEBP2	XLOC_014188	0.759958	0.0795146	0.133146
AEBP2	XLOC_023728	0.778388	0.0682262	0.118665
AEBP2	XLOC_008525	0.852172	0.0311642	0.0648716
AEBP2	XLOC_026943	0.938993	0.00546923	0.0168403
AFTPH	XLOC_022241	-0.801675	0.0550986	0.100903
AFTPH	XLOC_020132	-0.725287	0.102835	0.161537
AFTPH	XLOC_014062	-0.69414	0.126019	0.188604
AFTPH	XLOC_023491	-0.616214	0.192674	0.25871
AFTPH	XLOC_009932	-0.561648	0.246114	0.309788
AFTPH	XLOC_013593	-0.556953	0.250953	0.314206
AFTPH	XLOC_015281	-0.423452	0.402787	0.448009
AFTPH	XLOC_015932	-0.144239	0.785142	0.799728
AFTPH	XLOC_005034	0.212066	0.68667	0.70683
AFTPH	XLOC_009668	0.343942	0.50443	0.538252
AFTPH	XLOC_011827	0.397095	0.435666	0.477099
AFTPH	XLOC_005817	0.418384	0.409042	0.45352
AFTPH	XLOC_022303	0.467511	0.349825	0.401432
AFTPH	XLOC_019454	0.521709	0.288436	0.347806
AFTPH	XLOC_005292	0.560512	0.247281	0.310864
AFTPH	XLOC_014188	0.57936	0.228194	0.292954
AFTPH	XLOC_007175	0.620462	0.188738	0.254796
AFTPH	XLOC_023728	0.623867	0.185608	0.251675
AFTPH	XLOC_002110	0.642585	0.168789	0.234712
AFTPH	XLOC_008525	0.738194	0.0938408	0.150765
AFTPH	XLOC_026943	0.995843	2.58888e-05	0.00108158
AGAP2	XLOC_022241	-0.719836	0.106742	0.166211
AGAP2	XLOC_020132	-0.63192	0.17829	0.244342
AGAP2	XLOC_014062	-0.59548	0.212358	0.277908
AGAP2	XLOC_009932	-0.543123	0.265421	0.327334
AGAP2	XLOC_023491	-0.542553	0.266025	0.327869
AGAP2	XLOC_013593	-0.471438	0.345232	0.397435
AGAP2	XLOC_011777	-0.44858	0.372263	0.527205
AGAP2	XLOC_003704	-0.425162	0.400683	0.532702
AGAP2	XLOC_015754	-0.35626	0.488218	0.578436
AGAP2	XLOC_017606	-0.323888	0.531156	0.607485
AGAP2	XLOC_015281	-0.321952	0.533758	0.564751
AGAP2	XLOC_015932	-0.310094	0.549769	0.579345
AGAP2	XLOC_015932	-0.291264	0.575458	0.638104
AGAP2	XLOC_009502	-0.219077	0.676642	0.717786
AGAP2	XLOC_005034	0.0488218	0.926825	0.932075
AGAP2	XLOC_009668	0.175772	0.739057	0.75617
AGAP2	XLOC_011827	0.207436	0.693309	0.713066
AGAP2	XLOC_005817	0.250564	0.63202	0.655643
AGAP2	XLOC_022303	0.299924	0.563604	0.592076
AGAP2	XLOC_019454	0.394688	0.43871	0.479787
AGAP2	XLOC_014188	0.419478	0.407689	0.452328
AGAP2	XLOC_023658	0.446286	0.375015	0.527626
AGAP2	XLOC_023728	0.475997	0.339929	0.392776
AGAP2	XLOC_002110	0.504731	0.307194	0.36423
AGAP2	XLOC_005053	0.51724	0.29333	0.526098
AGAP2	XLOC_002110	0.520857	0.289367	0.526098
AGAP2	XLOC_011194	0.540283	0.268431	0.526098
AGAP2	XLOC_005292	0.585066	0.222535	0.287567
AGAP2	XLOC_005292	0.592366	0.215381	0.526098
AGAP2	XLOC_007175	0.60562	0.202633	0.268498
AGAP2	XLOC_019584	0.608207	0.200182	0.50776
AGAP2	XLOC_008525	0.610997	0.197553	0.263522
AGAP2	XLOC_026943	0.95885	0.00250513	0.00971238
AGAP2	XLOC_026943	0.960731	0.0022828	0.00994267
AGER,PBX2	XLOC_022241	-0.733582	0.0970131	0.154578
AGER,PBX2	XLOC_020132	-0.642376	0.168973	0.2349
AGER,PBX2	XLOC_014062	-0.603382	0.204763	0.270563
AGER,PBX2	XLOC_023491	-0.537452	0.271444	0.332769
AGER,PBX2	XLOC_009932	-0.531135	0.278215	0.338807
AGER,PBX2	XLOC_013593	-0.491417	0.32221	0.377311
AGER,PBX2	XLOC_015281	-0.343074	0.505578	0.539286
AGER,PBX2	XLOC_015932	-0.293913	0.571826	0.599685
AGER,PBX2	XLOC_005034	0.0651908	0.902352	0.909328
AGER,PBX2	XLOC_009668	0.181475	0.730776	0.74837
AGER,PBX2	XLOC_011827	0.22626	0.666401	0.687828
AGER,PBX2	XLOC_005817	0.228256	0.663562	0.685171
AGER,PBX2	XLOC_022303	0.290527	0.57647	0.604011
AGER,PBX2	XLOC_014188	0.399186	0.433026	0.474745
AGER,PBX2	XLOC_019454	0.399279	0.432908	0.47464
AGER,PBX2	XLOC_023728	0.46216	0.356117	0.406946
AGER,PBX2	XLOC_002110	0.515487	0.295259	0.353812
AGER,PBX2	XLOC_008525	0.59861	0.209337	0.274999
AGER,PBX2	XLOC_005292	0.70719	0.116054	0.177111
AGER,PBX2	XLOC_007175	0.713042	0.111702	0.172033
AGER,PBX2	XLOC_026943	0.932897	0.00660309	0.019375
AGO2	XLOC_022241	-0.638641	0.172278	0.23825
AGO2	XLOC_020132	-0.555879	0.252065	0.315223
AGO2	XLOC_014062	-0.523867	0.286083	0.345753
AGO2	XLOC_009932	-0.474806	0.341311	0.394002
AGO2	XLOC_023491	-0.463907	0.354058	0.405134
AGO2	XLOC_013593	-0.392372	0.441646	0.48236
AGO2	XLOC_015932	-0.301601	0.561316	0.589967
AGO2	XLOC_015281	-0.269379	0.605705	0.631095
AGO2	XLOC_005034	0.0471702	0.929297	0.934374
AGO2	XLOC_009668	0.17213	0.744355	0.76119
AGO2	XLOC_011827	0.250194	0.632539	0.656122
AGO2	XLOC_005817	0.282529	0.587483	0.614192
AGO2	XLOC_022303	0.316601	0.540965	0.571311
AGO2	XLOC_005292	0.339767	0.509961	0.543217
AGO2	XLOC_019454	0.359012	0.484618	0.520487
AGO2	XLOC_007175	0.388615	0.446422	0.48662
AGO2	XLOC_014188	0.445684	0.375738	0.424204
AGO2	XLOC_002110	0.469173	0.347879	0.399737
AGO2	XLOC_023728	0.482916	0.331936	0.385808
AGO2	XLOC_008525	0.607548	0.200806	0.266724
AGO2	XLOC_026943	0.949287	0.00379256	0.0129236
AGO4	XLOC_009932	-0.732429	0.0978127	0.155541
AGO4	XLOC_022241	-0.696699	0.124037	0.18634
AGO4	XLOC_020132	-0.678223	0.138652	0.20283
AGO4	XLOC_014062	-0.650766	0.16165	0.22742
AGO4	XLOC_023491	-0.554778	0.253208	0.316243
AGO4	XLOC_013593	-0.294051	0.571636	0.599513
AGO4	XLOC_015281	-0.138922	0.792957	0.807091
AGO4	XLOC_015932	0.082307	0.876818	0.88554
AGO4	XLOC_005292	0.306395	0.55479	0.583951
AGO4	XLOC_007175	0.414133	0.414314	0.458181
AGO4	XLOC_005034	0.437016	0.386207	0.433415
AGO4	XLOC_011827	0.439309	0.383429	0.430935
AGO4	XLOC_009668	0.483898	0.330808	0.38481
AGO4	XLOC_005817	0.581537	0.226028	0.290883
AGO4	XLOC_022303	0.601084	0.20696	0.2727
AGO4	XLOC_019454	0.661389	0.152574	0.217911
AGO4	XLOC_002110	0.67881	0.138177	0.202303
AGO4	XLOC_014188	0.694597	0.125664	0.188194
AGO4	XLOC_023728	0.724053	0.103714	0.162579
AGO4	XLOC_008525	0.816903	0.0472178	0.08965
AGO4	XLOC_026943	0.891536	0.0170087	0.0401885
AGTRAP	XLOC_022241	-0.728033	0.100891	0.159222
AGTRAP	XLOC_020132	-0.63462	0.175864	0.241903
AGTRAP	XLOC_014062	-0.595651	0.212192	0.277751
AGTRAP	XLOC_023491	-0.523193	0.286818	0.346387
AGTRAP	XLOC_009932	-0.511274	0.299912	0.357837
AGTRAP	XLOC_013593	-0.488347	0.325711	0.380359
AGTRAP	XLOC_015281	-0.346856	0.500581	0.534774
AGTRAP	XLOC_015932	-0.296081	0.568857	0.596947
AGTRAP	XLOC_005034	0.0660015	0.901141	0.908192
AGTRAP	XLOC_009668	0.183207	0.728264	0.746002
AGTRAP	XLOC_005817	0.234003	0.655402	0.67753
AGTRAP	XLOC_011827	0.249589	0.63339	0.656899
AGTRAP	XLOC_022303	0.296702	0.568006	0.596147
AGTRAP	XLOC_019454	0.393892	0.439719	0.480666
AGTRAP	XLOC_014188	0.407748	0.422274	0.465247
AGTRAP	XLOC_023728	0.467692	0.349612	0.401248
AGTRAP	XLOC_002110	0.516632	0.293998	0.3527
AGTRAP	XLOC_008525	0.603913	0.204257	0.270077
AGTRAP	XLOC_005292	0.68076	0.136604	0.200545
AGTRAP	XLOC_007175	0.690938	0.128518	0.191466
AGTRAP	XLOC_026943	0.942241	0.00490787	0.0155515
AIMP2	XLOC_002110	-0.866756	0.0254481	0.0552743
AIMP2	XLOC_008525	-0.814414	0.0484672	0.0914646
AIMP2	XLOC_023728	-0.807171	0.0521896	0.096807
AIMP2	XLOC_014188	-0.78542	0.0641271	0.113237
AIMP2	XLOC_007175	-0.770936	0.0726958	0.124468
AIMP2	XLOC_026943	-0.761725	0.0783982	0.131739
AIMP2	XLOC_022303	-0.746872	0.088001	0.143666
AIMP2	XLOC_019454	-0.730124	0.0994217	0.157475
AIMP2	XLOC_005817	-0.709121	0.11461	0.175447
AIMP2	XLOC_009668	-0.704659	0.117958	0.179324
AIMP2	XLOC_005292	-0.660755	0.153109	0.218469
AIMP2	XLOC_011827	-0.649985	0.162326	0.228134
AIMP2	XLOC_005034	-0.51689	0.293715	0.352448
AIMP2	XLOC_015932	-0.352562	0.493069	0.528034
AIMP2	XLOC_009932	0.477989	0.33762	0.39075
AIMP2	XLOC_015281	0.881937	0.0200855	0.0458277
AIMP2	XLOC_023491	0.898304	0.0149871	0.0363754
AIMP2	XLOC_020132	0.929804	0.00721835	0.0207225
AIMP2	XLOC_014062	0.931813	0.00681565	0.0198386
AIMP2	XLOC_013593	0.956679	0.00277446	0.0104076
AIMP2	XLOC_022241	0.95816	0.00258931	0.00993085
AK3	XLOC_022241	-0.712476	0.11212	0.172533
AK3	XLOC_020132	-0.623362	0.18607	0.252142
AK3	XLOC_014062	-0.592593	0.21516	0.280613
AK3	XLOC_013593	-0.505608	0.306215	0.363353
AK3	XLOC_023491	-0.498757	0.3139	0.370048
AK3	XLOC_009932	-0.419243	0.40798	0.452583
AK3	XLOC_015281	-0.408487	0.42135	0.464437
AK3	XLOC_015932	-0.207907	0.692633	0.712441
AK3	XLOC_005034	0.14016	0.791136	0.805383
AK3	XLOC_009668	0.273406	0.60011	0.6259
AK3	XLOC_005817	0.359758	0.483644	0.519611
AK3	XLOC_022303	0.409938	0.419538	0.462838
AK3	XLOC_019454	0.41936	0.407835	0.452457
AK3	XLOC_011827	0.42148	0.405216	0.450165
AK3	XLOC_005292	0.432241	0.392017	0.438545
AK3	XLOC_007175	0.493516	0.319826	0.375242
AK3	XLOC_014188	0.529116	0.280393	0.34072
AK3	XLOC_023728	0.56164	0.246122	0.309796
AK3	XLOC_002110	0.567008	0.240634	0.304678
AK3	XLOC_008525	0.675038	0.141243	0.205673
AK3	XLOC_026943	0.973639	0.00103323	0.00556064
AKAP13	XLOC_022241	-0.717159	0.108685	0.168501
AKAP13	XLOC_020132	-0.631033	0.17909	0.245144
AKAP13	XLOC_014062	-0.595886	0.211964	0.277534
AKAP13	XLOC_023491	-0.538199	0.270649	0.332036
AKAP13	XLOC_009932	-0.535254	0.273793	0.334867
AKAP13	XLOC_013593	-0.467123	0.350279	0.401844
AKAP13	XLOC_003704	-0.443659	0.378174	0.528052
AKAP13	XLOC_015754	-0.435057	0.388588	0.530018
AKAP13	XLOC_011777	-0.369779	0.470612	0.567233
AKAP13	XLOC_017606	-0.342444	0.506413	0.590611
AKAP13	XLOC_015932	-0.340522	0.50896	0.592279
AKAP13	XLOC_015281	-0.323965	0.531053	0.562287
AKAP13	XLOC_015932	-0.292017	0.574425	0.602097
AKAP13	XLOC_009502	-0.254046	0.627129	0.677397
AKAP13	XLOC_005034	0.0675505	0.898828	0.906048
AKAP13	XLOC_009668	0.195737	0.710145	0.728896
AKAP13	XLOC_011827	0.240163	0.646682	0.66938
AKAP13	XLOC_005817	0.279423	0.591774	0.618154
AKAP13	XLOC_022303	0.325611	0.528845	0.560284
AKAP13	XLOC_023658	0.403732	0.427306	0.542702
AKAP13	XLOC_019454	0.404827	0.425932	0.468461
AKAP13	XLOC_014188	0.447572	0.373471	0.422202
AKAP13	XLOC_005053	0.459916	0.358768	0.526098
AKAP13	XLOC_002110	0.467612	0.349706	0.526098
AKAP13	XLOC_005292	0.498025	0.314725	0.526098
AKAP13	XLOC_023728	0.498849	0.313796	0.369956
AKAP13	XLOC_011194	0.512513	0.298542	0.526098
AKAP13	XLOC_002110	0.516885	0.29372	0.352453
AKAP13	XLOC_005292	0.531198	0.278148	0.338747
AKAP13	XLOC_019584	0.546803	0.26154	0.526098
AKAP13	XLOC_007175	0.56293	0.244799	0.308561
AKAP13	XLOC_008525	0.630357	0.1797	0.245753
AKAP13	XLOC_026943	0.967548	0.00156263	0.00746314
AKAP13	XLOC_026943	0.96961	0.00137129	0.00659517
AKIRIN1	XLOC_022241	-0.651981	0.160601	0.226337
AKIRIN1	XLOC_020132	-0.582909	0.224668	0.28959
AKIRIN1	XLOC_009932	-0.551791	0.256316	0.319099
AKIRIN1	XLOC_014062	-0.548986	0.259249	0.321753
AKIRIN1	XLOC_023491	-0.468945	0.348146	0.399965
AKIRIN1	XLOC_013593	-0.342581	0.506232	0.53987
AKIRIN1	XLOC_015932	-0.219464	0.67609	0.69692
AKIRIN1	XLOC_015281	-0.207389	0.693377	0.713128
AKIRIN1	XLOC_005034	0.148018	0.779594	0.794497
AKIRIN1	XLOC_009668	0.243795	0.641553	0.664582
AKIRIN1	XLOC_011827	0.303607	0.558582	0.587435
AKIRIN1	XLOC_005817	0.349268	0.497401	0.531913
AKIRIN1	XLOC_005292	0.352108	0.493665	0.528572
AKIRIN1	XLOC_022303	0.383863	0.452487	0.492021
AKIRIN1	XLOC_007175	0.412569	0.416258	0.459903
AKIRIN1	XLOC_019454	0.437359	0.385791	0.433048
AKIRIN1	XLOC_014188	0.505956	0.305826	0.363011
AKIRIN1	XLOC_002110	0.523195	0.286816	0.346386
AKIRIN1	XLOC_023728	0.543637	0.264878	0.326847
AKIRIN1	XLOC_008525	0.66748	0.147471	0.212454
AKIRIN1	XLOC_026943	0.950678	0.00358897	0.0124269
AKIRIN2	XLOC_022241	-0.682913	0.134876	0.19865
AKIRIN2	XLOC_020132	-0.587186	0.220448	0.285609
AKIRIN2	XLOC_014062	-0.547009	0.261324	0.323625
AKIRIN2	XLOC_009932	-0.504615	0.307324	0.364345
AKIRIN2	XLOC_023491	-0.486926	0.327336	0.381779
AKIRIN2	XLOC_013593	-0.437738	0.385332	0.432639
AKIRIN2	XLOC_015932	-0.361696	0.481115	0.517362
AKIRIN2	XLOC_015281	-0.290867	0.576003	0.603572
AKIRIN2	XLOC_005034	-1.02927e-05	0.999985	0.999986
AKIRIN2	XLOC_009668	0.115266	0.827866	0.839845
AKIRIN2	XLOC_011827	0.170606	0.746574	0.763283
AKIRIN2	XLOC_005817	0.174609	0.740749	0.757768
AKIRIN2	XLOC_022303	0.233012	0.656807	0.678837
AKIRIN2	XLOC_019454	0.340717	0.508701	0.542088
AKIRIN2	XLOC_014188	0.34946	0.497149	0.531683
AKIRIN2	XLOC_023728	0.411383	0.417736	0.461219
AKIRIN2	XLOC_002110	0.455274	0.364273	0.414075
AKIRIN2	XLOC_008525	0.554422	0.253577	0.316586
AKIRIN2	XLOC_007175	0.643447	0.16803	0.233948
AKIRIN2	XLOC_005292	0.643684	0.167823	0.233741
AKIRIN2	XLOC_026943	0.927711	0.00764972	0.0216475
ALAD	XLOC_015754	0.982728	0.000444883	0.00994465
ALAD	XLOC_024373	0.991931	9.73921e-05	0.00550234
ALCAM	XLOC_022241	-0.733014	0.0974066	0.15505
ALCAM	XLOC_020132	-0.642368	0.16898	0.234908
ALCAM	XLOC_014062	-0.609735	0.19874	0.264676
ALCAM	XLOC_023491	-0.552822	0.255241	0.318108
ALCAM	XLOC_013593	-0.521165	0.28903	0.348321
ALCAM	XLOC_009932	-0.491185	0.322475	0.377546
ALCAM	XLOC_015281	-0.391661	0.442549	0.483163
ALCAM	XLOC_015932	-0.283647	0.58594	0.61277
ALCAM	XLOC_005034	0.064047	0.904061	0.910923
ALCAM	XLOC_009668	0.208305	0.692062	0.7119
ALCAM	XLOC_011827	0.275019	0.597872	0.623812
ALCAM	XLOC_005817	0.291674	0.574896	0.60253
ALCAM	XLOC_022303	0.338979	0.511007	0.544153
ALCAM	XLOC_019454	0.39874	0.433588	0.475232
ALCAM	XLOC_014188	0.461119	0.357346	0.408014
ALCAM	XLOC_023728	0.508455	0.303042	0.360579
ALCAM	XLOC_005292	0.524594	0.285293	0.345057
ALCAM	XLOC_002110	0.529181	0.280323	0.34066
ALCAM	XLOC_007175	0.56099	0.246789	0.310407
ALCAM	XLOC_008525	0.633673	0.176713	0.242761
ALCAM	XLOC_026943	0.975352	0.000903797	0.00514041
ALDH16A1	XLOC_002110	-0.95619	0.0028369	0.0105672
ALDH16A1	XLOC_023728	-0.922198	0.00884416	0.0241711
ALDH16A1	XLOC_014188	-0.908001	0.0123063	0.0311873
ALDH16A1	XLOC_022303	-0.900041	0.0144883	0.0354244
ALDH16A1	XLOC_019454	-0.898276	0.0149954	0.0363915
ALDH16A1	XLOC_008525	-0.896997	0.015368	0.0371015
ALDH16A1	XLOC_009668	-0.885322	0.0189725	0.0438026
ALDH16A1	XLOC_005817	-0.882783	0.0198044	0.0453185
ALDH16A1	XLOC_005034	-0.748247	0.0870914	0.142561
ALDH16A1	XLOC_007175	-0.728019	0.100901	0.159233
ALDH16A1	XLOC_011827	-0.705203	0.117548	0.178844
ALDH16A1	XLOC_026943	-0.648562	0.163561	0.229403
ALDH16A1	XLOC_015932	-0.617047	0.191898	0.257952
ALDH16A1	XLOC_005292	-0.581838	0.22573	0.290603
ALDH16A1	XLOC_009932	0.634772	0.175728	0.24176
ALDH16A1	XLOC_015281	0.774605	0.0704791	0.1216
ALDH16A1	XLOC_013593	0.869248	0.0245264	0.0536876
ALDH16A1	XLOC_022241	0.948549	0.00390272	0.0131888
ALDH16A1	XLOC_023491	0.950769	0.00357592	0.012394
ALDH16A1	XLOC_020132	0.972618	0.00111436	0.00581257
ALDH16A1	XLOC_014062	0.982313	0.000466461	0.00357194
ALKBH7	XLOC_026943	-0.93941	0.0053955	0.0166725
ALKBH7	XLOC_007175	-0.74623	0.0884277	0.144182
ALKBH7	XLOC_005292	-0.708665	0.114951	0.175834
ALKBH7	XLOC_008525	-0.699543	0.121849	0.183818
ALKBH7	XLOC_002110	-0.6421	0.169216	0.235146
ALKBH7	XLOC_023728	-0.593848	0.21394	0.279433
ALKBH7	XLOC_019454	-0.545671	0.262732	0.324889
ALKBH7	XLOC_014188	-0.533972	0.275167	0.336101
ALKBH7	XLOC_022303	-0.435867	0.387602	0.434631
ALKBH7	XLOC_005817	-0.394069	0.439494	0.480467
ALKBH7	XLOC_009668	-0.340053	0.509582	0.542875
ALKBH7	XLOC_011827	-0.250291	0.632404	0.655996
ALKBH7	XLOC_005034	-0.183476	0.727874	0.745637
ALKBH7	XLOC_015932	0.12816	0.808813	0.821999
ALKBH7	XLOC_015281	0.494566	0.318635	0.3742
ALKBH7	XLOC_009932	0.650029	0.162287	0.228094
ALKBH7	XLOC_013593	0.661104	0.152814	0.21816
ALKBH7	XLOC_023491	0.754544	0.0829791	0.137472
ALKBH7	XLOC_014062	0.771267	0.0724945	0.12421
ALKBH7	XLOC_020132	0.797397	0.0574137	0.104116
ALKBH7	XLOC_022241	0.86284	0.0269292	0.0578112
ALOX5	XLOC_002110	-0.807528	0.0520029	0.0965465
ALOX5	XLOC_023728	-0.769256	0.0737212	0.125789
ALOX5	XLOC_019454	-0.750577	0.0855594	0.140673
ALOX5	XLOC_008525	-0.748188	0.0871301	0.142608
ALOX5	XLOC_014188	-0.747574	0.0875363	0.143102
ALOX5	XLOC_005817	-0.726927	0.101672	0.160162
ALOX5	XLOC_022303	-0.726312	0.102107	0.160679
ALOX5	XLOC_009668	-0.708569	0.115022	0.17592
ALOX5	XLOC_007175	-0.651013	0.161436	0.227199
ALOX5	XLOC_026943	-0.610039	0.198454	0.2644
ALOX5	XLOC_005292	-0.536564	0.272393	0.333613
ALOX5	XLOC_005034	-0.520301	0.289975	0.349154
ALOX5	XLOC_011827	-0.443408	0.378477	0.426608
ALOX5	XLOC_015932	-0.436914	0.386331	0.433517
ALOX5	XLOC_009932	0.597459	0.210445	0.276076
ALOX5	XLOC_015281	0.800738	0.0556021	0.101598
ALOX5	XLOC_022241	0.902145	0.0138948	0.0342874
ALOX5	XLOC_013593	0.908751	0.0121098	0.0308011
ALOX5	XLOC_020132	0.915827	0.0103294	0.0272391
ALOX5	XLOC_014062	0.930457	0.00708613	0.0204343
ALOX5	XLOC_023491	0.981304	0.000521062	0.00378593
ALPK1	XLOC_022241	-0.731053	0.0987718	0.156697
ALPK1	XLOC_020132	-0.646373	0.165467	0.231343
ALPK1	XLOC_014062	-0.613185	0.1955	0.261485
ALPK1	XLOC_023491	-0.556208	0.251724	0.314906
ALPK1	XLOC_009932	-0.530636	0.278753	0.339283
ALPK1	XLOC_013593	-0.491706	0.321882	0.377024
ALPK1	XLOC_015281	-0.353179	0.492258	0.527309
ALPK1	XLOC_015932	-0.268616	0.606766	0.632086
ALPK1	XLOC_005034	0.0857247	0.871728	0.880779
ALPK1	XLOC_009668	0.220808	0.67417	0.695112
ALPK1	XLOC_011827	0.267287	0.608618	0.633806
ALPK1	XLOC_005817	0.308002	0.552606	0.581946
ALPK1	XLOC_022303	0.352126	0.493641	0.528551
ALPK1	XLOC_019454	0.420287	0.40669	0.451447
ALPK1	XLOC_014188	0.474172	0.342048	0.394645
ALPK1	XLOC_005292	0.510778	0.300463	0.358323
ALPK1	XLOC_023728	0.522191	0.28791	0.347338
ALPK1	XLOC_002110	0.536535	0.272424	0.333639
ALPK1	XLOC_007175	0.550687	0.25747	0.320132
ALPK1	XLOC_008525	0.648596	0.163531	0.229371
ALPK1	XLOC_026943	0.977057	0.000783536	0.00473951
AMPD3	XLOC_022241	-0.758657	0.0803411	0.134186
AMPD3	XLOC_020132	-0.669954	0.145419	0.210229
AMPD3	XLOC_014062	-0.637849	0.172981	0.238963
AMPD3	XLOC_023491	-0.579829	0.227726	0.292515
AMPD3	XLOC_013593	-0.547995	0.260288	0.322688
AMPD3	XLOC_011777	-0.516715	0.293907	0.526098
AMPD3	XLOC_009932	-0.506931	0.304739	0.36205
AMPD3	XLOC_015281	-0.416505	0.41137	0.45557
AMPD3	XLOC_003704	-0.383097	0.453467	0.556627
AMPD3	XLOC_015754	-0.29677	0.567913	0.63252
AMPD3	XLOC_017606	-0.263989	0.613216	0.666468
AMPD3	XLOC_015932	-0.255442	0.625171	0.649276
AMPD3	XLOC_015932	-0.250697	0.631833	0.681188
AMPD3	XLOC_009502	-0.145335	0.783533	0.810198
AMPD3	XLOC_005034	0.091454	0.863201	0.872809
AMPD3	XLOC_009668	0.237316	0.650709	0.673142
AMPD3	XLOC_011827	0.296063	0.568881	0.596967
AMPD3	XLOC_005817	0.315531	0.542411	0.572633
AMPD3	XLOC_022303	0.364304	0.477718	0.514363
AMPD3	XLOC_019454	0.425947	0.399719	0.445316
AMPD3	XLOC_014188	0.483384	0.331398	0.385328
AMPD3	XLOC_023658	0.492544	0.32093	0.526098
AMPD3	XLOC_023728	0.531635	0.277677	0.33833
AMPD3	XLOC_005292	0.555543	0.252413	0.315537
AMPD3	XLOC_005292	0.556561	0.251359	0.526098
AMPD3	XLOC_002110	0.556804	0.251107	0.314345
AMPD3	XLOC_002110	0.557414	0.250477	0.526098
AMPD3	XLOC_005053	0.557667	0.250214	0.526098
AMPD3	XLOC_011194	0.589401	0.218275	0.526098
AMPD3	XLOC_007175	0.594362	0.213441	0.27895
AMPD3	XLOC_019584	0.634371	0.176088	0.467062
AMPD3	XLOC_008525	0.654295	0.15861	0.224284
AMPD3	XLOC_026943	0.979997	0.000596188	0.00378505
AMPD3	XLOC_026943	0.980225	0.000582697	0.0040238
ANGPTL4	XLOC_002110	-0.814413	0.0484677	0.091465
ANGPTL4	XLOC_005053	-0.806923	0.0523191	0.15539
ANGPTL4	XLOC_002110	-0.768427	0.0742299	0.214675
ANGPTL4	XLOC_019584	-0.762922	0.0776461	0.223974
ANGPTL4	XLOC_023728	-0.762075	0.0781784	0.131463
ANGPTL4	XLOC_014188	-0.753468	0.0836751	0.138342
ANGPTL4	XLOC_011194	-0.743906	0.0899787	0.256978
ANGPTL4	XLOC_008525	-0.737116	0.0945784	0.151656
ANGPTL4	XLOC_022303	-0.729452	0.0998926	0.158027
ANGPTL4	XLOC_023658	-0.723918	0.10381	0.293191
ANGPTL4	XLOC_005817	-0.707506	0.115817	0.17684
ANGPTL4	XLOC_009668	-0.70288	0.119306	0.180889
ANGPTL4	XLOC_019454	-0.67969	0.137466	0.201506
ANGPTL4	XLOC_007175	-0.656708	0.156546	0.222123
ANGPTL4	XLOC_026943	-0.63585	0.174763	0.240783
ANGPTL4	XLOC_011827	-0.621788	0.187516	0.253576
ANGPTL4	XLOC_026943	-0.566851	0.240794	0.526098
ANGPTL4	XLOC_005292	-0.540149	0.268574	0.526098
ANGPTL4	XLOC_005292	-0.538483	0.270346	0.331778
ANGPTL4	XLOC_005034	-0.496973	0.315912	0.371818
ANGPTL4	XLOC_015754	-0.453406	0.366496	0.526469
ANGPTL4	XLOC_009502	-0.451304	0.369004	0.52682
ANGPTL4	XLOC_015932	-0.412911	0.415834	0.459521
ANGPTL4	XLOC_015932	-0.394123	0.439425	0.548965
ANGPTL4	XLOC_017606	-0.229287	0.662097	0.705845
ANGPTL4	XLOC_003704	-0.0507742	0.923904	0.934138
ANGPTL4	XLOC_009932	0.379899	0.457566	0.496499
ANGPTL4	XLOC_020132	0.878312	0.0213109	0.0480308
ANGPTL4	XLOC_014062	0.892262	0.0167861	0.039769
ANGPTL4	XLOC_023491	0.892796	0.0166229	0.039465
ANGPTL4	XLOC_022241	0.894086	0.0162327	0.0387425
ANGPTL4	XLOC_015281	0.941968	0.00495384	0.0156551
ANGPTL4	XLOC_013593	0.987692	0.000226285	0.00250622
ANGPTL4	XLOC_011777	0.993766	5.81815e-05	0.00089311
ANKFY1	XLOC_022241	-0.676397	0.140134	0.204453
ANKFY1	XLOC_020132	-0.592906	0.214856	0.280322
ANKFY1	XLOC_014062	-0.55661	0.251308	0.314527
ANKFY1	XLOC_009932	-0.534369	0.274741	0.335717
ANKFY1	XLOC_023491	-0.492651	0.320808	0.3761
ANKFY1	XLOC_003704	-0.427879	0.397349	0.531783
ANKFY1	XLOC_011777	-0.412854	0.415904	0.537516
ANKFY1	XLOC_013593	-0.40149	0.430123	0.472149
ANKFY1	XLOC_015754	-0.383312	0.453192	0.556467
ANKFY1	XLOC_017606	-0.323098	0.532218	0.608195
ANKFY1	XLOC_015932	-0.303192	0.559147	0.587962
ANKFY1	XLOC_015932	-0.300035	0.563452	0.629484
ANKFY1	XLOC_015281	-0.258924	0.620293	0.644697
ANKFY1	XLOC_009502	-0.224817	0.668456	0.711093
ANKFY1	XLOC_005034	0.0633817	0.905055	0.91185
ANKFY1	XLOC_009668	0.177941	0.735906	0.753214
ANKFY1	XLOC_011827	0.231035	0.659614	0.681458
ANKFY1	XLOC_005817	0.270099	0.604704	0.630168
ANKFY1	XLOC_022303	0.313087	0.545714	0.575625
ANKFY1	XLOC_019454	0.389645	0.445111	0.485456
ANKFY1	XLOC_014188	0.437627	0.385466	0.432757
ANKFY1	XLOC_023658	0.453599	0.366266	0.526469
ANKFY1	XLOC_005292	0.470279	0.346586	0.398613
ANKFY1	XLOC_005292	0.472755	0.343697	0.526098
ANKFY1	XLOC_023728	0.486209	0.328156	0.382501
ANKFY1	XLOC_002110	0.491885	0.321678	0.376851
ANKFY1	XLOC_005053	0.497247	0.315603	0.526098
ANKFY1	XLOC_002110	0.503971	0.308045	0.526098
ANKFY1	XLOC_007175	0.504693	0.307237	0.364266
ANKFY1	XLOC_011194	0.551907	0.256196	0.526098
ANKFY1	XLOC_019584	0.584305	0.223287	0.526098
ANKFY1	XLOC_008525	0.620383	0.18881	0.254868
ANKFY1	XLOC_026943	0.960831	0.00227127	0.00910227
ANKFY1	XLOC_026943	0.97902	0.000655593	0.00404473
ANKRD12	XLOC_022241	-0.750497	0.0856117	0.14074
ANKRD12	XLOC_020132	-0.667762	0.147237	0.212196
ANKRD12	XLOC_014062	-0.637593	0.173209	0.239192
ANKRD12	XLOC_023491	-0.574376	0.233181	0.297661
ANKRD12	XLOC_013593	-0.529091	0.280419	0.340741
ANKRD12	XLOC_009932	-0.510269	0.301027	0.35881
ANKRD12	XLOC_015281	-0.403086	0.428118	0.470392
ANKRD12	XLOC_015932	-0.219835	0.67556	0.696425
ANKRD12	XLOC_005034	0.126812	0.810801	0.823871
ANKRD12	XLOC_009668	0.269816	0.605097	0.630537
ANKRD12	XLOC_011827	0.334459	0.517019	0.549589
ANKRD12	XLOC_005817	0.360214	0.483049	0.519083
ANKRD12	XLOC_022303	0.402978	0.428253	0.47051
ANKRD12	XLOC_019454	0.447305	0.373791	0.422479
ANKRD12	XLOC_005292	0.476599	0.33923	0.392155
ANKRD12	XLOC_014188	0.523756	0.286205	0.345857
ANKRD12	XLOC_007175	0.531562	0.277756	0.338399
ANKRD12	XLOC_023728	0.565028	0.242652	0.306556
ANKRD12	XLOC_002110	0.573667	0.233895	0.298336
ANKRD12	XLOC_008525	0.68198	0.135623	0.199481
ANKRD12	XLOC_026943	0.986327	0.000279144	0.00276244
ANKRD13D	XLOC_002110	-0.756561	0.0816802	0.135851
ANKRD13D	XLOC_026943	-0.719671	0.106862	0.166352
ANKRD13D	XLOC_007175	-0.696609	0.124106	0.186419
ANKRD13D	XLOC_008525	-0.695922	0.124637	0.187022
ANKRD13D	XLOC_023728	-0.690804	0.128623	0.191584
ANKRD13D	XLOC_014188	-0.672884	0.143006	0.207602
ANKRD13D	XLOC_022303	-0.627838	0.181983	0.24805
ANKRD13D	XLOC_005292	-0.604796	0.203417	0.269249
ANKRD13D	XLOC_005817	-0.591757	0.215974	0.281389
ANKRD13D	XLOC_019454	-0.588264	0.219389	0.284603
ANKRD13D	XLOC_009668	-0.582016	0.225553	0.290432
ANKRD13D	XLOC_011827	-0.567563	0.240069	0.304153
ANKRD13D	XLOC_005034	-0.362411	0.480183	0.51653
ANKRD13D	XLOC_015932	-0.235016	0.653966	0.67619
ANKRD13D	XLOC_009932	0.332223	0.519999	0.552265
ANKRD13D	XLOC_023491	0.843792	0.0346954	0.07057
ANKRD13D	XLOC_020132	0.847001	0.0333223	0.068363
ANKRD13D	XLOC_014062	0.852222	0.031144	0.0648377
ANKRD13D	XLOC_022241	0.893144	0.0165172	0.0392697
ANKRD13D	XLOC_015281	0.938613	0.0055368	0.0169919
ANKRD13D	XLOC_013593	0.986719	0.000263395	0.00268766
ANKRD17,COX18	XLOC_022241	-0.783667	0.0651376	0.11458
ANKRD17,COX18	XLOC_020132	-0.722918	0.104525	0.163552
ANKRD17,COX18	XLOC_014062	-0.698342	0.122771	0.184879
ANKRD17,COX18	XLOC_023491	-0.641617	0.169643	0.235578
ANKRD17,COX18	XLOC_009932	-0.590288	0.217408	0.282745
ANKRD17,COX18	XLOC_013593	-0.53738	0.271522	0.332837
ANKRD17,COX18	XLOC_015281	-0.403474	0.42763	0.469966
ANKRD17,COX18	XLOC_015932	-0.0954461	0.857266	0.867272
ANKRD17,COX18	XLOC_005034	0.239519	0.647592	0.670217
ANKRD17,COX18	XLOC_009668	0.37888	0.458874	0.497655
ANKRD17,COX18	XLOC_011827	0.386925	0.448576	0.488549
ANKRD17,COX18	XLOC_005292	0.403374	0.427755	0.470074
ANKRD17,COX18	XLOC_005817	0.480912	0.334244	0.387796
ANKRD17,COX18	XLOC_007175	0.487799	0.326337	0.380916
ANKRD17,COX18	XLOC_022303	0.509905	0.301431	0.359168
ANKRD17,COX18	XLOC_019454	0.54643	0.261933	0.324172
ANKRD17,COX18	XLOC_014188	0.624642	0.184897	0.250964
ANKRD17,COX18	XLOC_002110	0.646793	0.1651	0.230972
ANKRD17,COX18	XLOC_023728	0.658849	0.154724	0.220184
ANKRD17,COX18	XLOC_008525	0.759112	0.0800518	0.133822
ANKRD17,COX18	XLOC_026943	0.983603	0.000401068	0.00330755
ANKRD22	XLOC_022241	-0.741156	0.0918291	0.14834
ANKRD22	XLOC_020132	-0.651594	0.160934	0.226677
ANKRD22	XLOC_014062	-0.619564	0.189567	0.25563
ANKRD22	XLOC_023491	-0.558062	0.249806	0.313164
ANKRD22	XLOC_013593	-0.530037	0.279399	0.339848
ANKRD22	XLOC_009932	-0.489358	0.324557	0.379349
ANKRD22	XLOC_015281	-0.403833	0.427179	0.469565
ANKRD22	XLOC_015932	-0.263157	0.614377	0.639155
ANKRD22	XLOC_005034	0.0845984	0.873405	0.882338
ANKRD22	XLOC_009668	0.229019	0.662478	0.684155
ANKRD22	XLOC_011827	0.302546	0.560028	0.588782
ANKRD22	XLOC_005817	0.312497	0.546513	0.576358
ANKRD22	XLOC_022303	0.360046	0.483268	0.519281
ANKRD22	XLOC_019454	0.413012	0.415708	0.459417
ANKRD22	XLOC_014188	0.481353	0.333735	0.387349
ANKRD22	XLOC_005292	0.518225	0.292249	0.351155
ANKRD22	XLOC_023728	0.526741	0.282962	0.342998
ANKRD22	XLOC_002110	0.545783	0.262614	0.324782
ANKRD22	XLOC_007175	0.559925	0.247885	0.311412
ANKRD22	XLOC_008525	0.649351	0.162875	0.228702
ANKRD22	XLOC_026943	0.98004	0.000593627	0.00406317
ANP32B	XLOC_002110	-0.885977	0.0187607	0.0434179
ANP32B	XLOC_008525	-0.852607	0.0309862	0.0645776
ANP32B	XLOC_023728	-0.847382	0.0331609	0.068105
ANP32B	XLOC_019454	-0.831948	0.0399892	0.0788365
ANP32B	XLOC_014188	-0.816411	0.0474635	0.0900114
ANP32B	XLOC_022303	-0.783513	0.065227	0.114702
ANP32B	XLOC_005817	-0.770587	0.0729082	0.12474
ANP32B	XLOC_009668	-0.750659	0.0855054	0.140607
ANP32B	XLOC_007175	-0.74857	0.0868784	0.1423
ANP32B	XLOC_026943	-0.732741	0.0975962	0.155279
ANP32B	XLOC_005292	-0.631127	0.179005	0.245063
ANP32B	XLOC_005034	-0.585844	0.221769	0.286849
ANP32B	XLOC_011827	-0.511444	0.299724	0.357671
ANP32B	XLOC_015932	-0.423952	0.402171	0.447463
ANP32B	XLOC_009932	0.706262	0.116751	0.17792
ANP32B	XLOC_015281	0.739075	0.0932403	0.150042
ANP32B	XLOC_013593	0.873233	0.0230863	0.0511863
ANP32B	XLOC_022241	0.970571	0.00128634	0.00634041
ANP32B	XLOC_020132	0.977917	0.000726104	0.00454104
ANP32B	XLOC_014062	0.982006	0.000482767	0.00363812
ANP32B	XLOC_023491	0.992449	8.53014e-05	0.00165889
ANTXR2	XLOC_022241	-0.740627	0.0921871	0.148771
ANTXR2	XLOC_020132	-0.6495	0.162746	0.228568
ANTXR2	XLOC_014062	-0.615791	0.193067	0.259102
ANTXR2	XLOC_023491	-0.562982	0.244745	0.308509
ANTXR2	XLOC_013593	-0.526315	0.283424	0.343412
ANTXR2	XLOC_009932	-0.50705	0.304606	0.36193
ANTXR2	XLOC_015281	-0.389604	0.445163	0.485505
ANTXR2	XLOC_015932	-0.292967	0.573122	0.600896
ANTXR2	XLOC_005034	0.0554759	0.916872	0.922831
ANTXR2	XLOC_009668	0.198296	0.706455	0.725426
ANTXR2	XLOC_011827	0.249782	0.633119	0.656653
ANTXR2	XLOC_005817	0.274452	0.598658	0.624545
ANTXR2	XLOC_022303	0.324086	0.530891	0.562134
ANTXR2	XLOC_019454	0.398353	0.434077	0.475691
ANTXR2	XLOC_014188	0.444079	0.377669	0.425902
ANTXR2	XLOC_023728	0.496082	0.31692	0.3727
ANTXR2	XLOC_002110	0.525371	0.284448	0.344317
ANTXR2	XLOC_005292	0.572415	0.235156	0.299523
ANTXR2	XLOC_007175	0.600559	0.207463	0.273187
ANTXR2	XLOC_008525	0.624159	0.185339	0.251408
ANTXR2	XLOC_026943	0.969568	0.0013751	0.00660721
ANXA3	XLOC_015754	-0.44484	0.376753	0.527711
ANXA3	XLOC_003704	-0.442838	0.379165	0.528439
ANXA3	XLOC_015932	-0.370733	0.469378	0.566385
ANXA3	XLOC_017606	-0.349172	0.497528	0.584635
ANXA3	XLOC_011777	-0.347752	0.499399	0.58583
ANXA3	XLOC_009502	-0.267542	0.608262	0.662794
ANXA3	XLOC_023658	0.3751	0.463738	0.562757
ANXA3	XLOC_005053	0.435756	0.387738	0.529871
ANXA3	XLOC_002110	0.443876	0.377913	0.527852
ANXA3	XLOC_011194	0.48266	0.33223	0.526098
ANXA3	XLOC_005292	0.515713	0.29501	0.526098
ANXA3	XLOC_019584	0.528711	0.28083	0.526098
ANXA3	XLOC_026943	0.958848	0.00250534	0.0106958
ANXA7	XLOC_014062	-0.78766	0.0628452	0.111521
ANXA7	XLOC_020132	-0.76939	0.0736395	0.125684
ANXA7	XLOC_023491	-0.70277	0.119389	0.180985
ANXA7	XLOC_022241	-0.688789	0.130208	0.193396
ANXA7	XLOC_009932	-0.558201	0.249663	0.31303
ANXA7	XLOC_013593	-0.540212	0.268507	0.330115
ANXA7	XLOC_015281	-0.49475	0.318427	0.374011
ANXA7	XLOC_005292	0.22893	0.662604	0.684275
ANXA7	XLOC_026943	0.367881	0.473072	0.510241
ANXA7	XLOC_007175	0.4204	0.40655	0.451325
ANXA7	XLOC_011827	0.843704	0.0347338	0.0706311
ANXA7	XLOC_008525	0.853331	0.0306901	0.0640881
ANXA7	XLOC_015932	0.899802	0.0145566	0.035556
ANXA7	XLOC_002110	0.902196	0.0138807	0.034259
ANXA7	XLOC_019454	0.920784	0.00916418	0.0248438
ANXA7	XLOC_023728	0.927045	0.00778946	0.0219487
ANXA7	XLOC_014188	0.947063	0.00412927	0.013728
ANXA7	XLOC_005034	0.967675	0.00155044	0.00711872
ANXA7	XLOC_022303	0.981633	0.000502927	0.00371678
ANXA7	XLOC_005817	0.985015	0.000335124	0.00302034
ANXA7	XLOC_009668	0.993726	5.89139e-05	0.00144032
AOAH	XLOC_022241	-0.747378	0.0876658	0.143258
AOAH	XLOC_020132	-0.658857	0.154717	0.220176
AOAH	XLOC_014062	-0.624494	0.185033	0.251098
AOAH	XLOC_023491	-0.564142	0.243558	0.30739
AOAH	XLOC_009932	-0.523674	0.286294	0.345938
AOAH	XLOC_013593	-0.517418	0.293135	0.351923
AOAH	XLOC_015754	-0.478331	0.337225	0.526098
AOAH	XLOC_003704	-0.467419	0.349933	0.526098
AOAH	XLOC_015281	-0.378843	0.458921	0.4977
AOAH	XLOC_017606	-0.370559	0.469603	0.566459
AOAH	XLOC_015932	-0.359958	0.483382	0.575472
AOAH	XLOC_011777	-0.334766	0.516609	0.59765
AOAH	XLOC_009502	-0.28866	0.579036	0.640732
AOAH	XLOC_015932	-0.270966	0.603499	0.629047
AOAH	XLOC_005034	0.0840233	0.874262	0.883135
AOAH	XLOC_009668	0.21982	0.675582	0.696442
AOAH	XLOC_011827	0.272353	0.601572	0.627266
AOAH	XLOC_005817	0.29443	0.571117	0.599031
AOAH	XLOC_022303	0.34512	0.502873	0.536838
AOAH	XLOC_023658	0.374398	0.464643	0.563404
AOAH	XLOC_019454	0.420206	0.40679	0.451533
AOAH	XLOC_005053	0.438421	0.384504	0.529293
AOAH	XLOC_002110	0.447655	0.373372	0.527309
AOAH	XLOC_014188	0.463651	0.354359	0.405396
AOAH	XLOC_011194	0.488487	0.32555	0.526098
AOAH	XLOC_023728	0.515501	0.295243	0.353801
AOAH	XLOC_005292	0.519928	0.290382	0.526098
AOAH	XLOC_019584	0.526902	0.282787	0.526098
AOAH	XLOC_002110	0.543442	0.265084	0.327029
AOAH	XLOC_005292	0.578057	0.229494	0.294194
AOAH	XLOC_007175	0.609877	0.198606	0.264548
AOAH	XLOC_008525	0.643605	0.167892	0.233809
AOAH	XLOC_026943	0.957118	0.00271885	0.0114146
AOAH	XLOC_026943	0.974632	0.000957139	0.00531803
AOX1	XLOC_014062	-0.430797	0.393779	0.440098
AOX1	XLOC_020132	-0.396697	0.436168	0.477537
AOX1	XLOC_023491	-0.386608	0.448981	0.488909
AOX1	XLOC_009932	-0.279725	0.591356	0.61778
AOX1	XLOC_022241	-0.273028	0.600634	0.62639
AOX1	XLOC_015281	-0.267675	0.608077	0.633306
AOX1	XLOC_013593	-0.247966	0.635675	0.659053
AOX1	XLOC_026943	-0.174074	0.741526	0.758503
AOX1	XLOC_005292	-0.0186196	0.972074	0.974131
AOX1	XLOC_007175	0.136054	0.797178	0.811033
AOX1	XLOC_008525	0.462299	0.355953	0.406802
AOX1	XLOC_002110	0.570383	0.237209	0.301466
AOX1	XLOC_023728	0.596747	0.211132	0.27674
AOX1	XLOC_011827	0.628566	0.181323	0.247388
AOX1	XLOC_014188	0.636756	0.173955	0.239956
AOX1	XLOC_019454	0.658886	0.154692	0.22015
AOX1	XLOC_022303	0.736092	0.095281	0.152509
AOX1	XLOC_005817	0.762724	0.0777706	0.130936
AOX1	XLOC_009668	0.821361	0.0450175	0.0864083
AOX1	XLOC_005034	0.871536	0.0236943	0.0522492
AOX1	XLOC_015932	0.993474	6.37491e-05	0.00148224
AP1B1	XLOC_026943	-0.805281	0.0531819	0.0982117
AP1B1	XLOC_002110	-0.790431	0.0612769	0.109415
AP1B1	XLOC_007175	-0.765915	0.0757802	0.128426
AP1B1	XLOC_008525	-0.750945	0.0853181	0.140374
AP1B1	XLOC_023728	-0.723033	0.104443	0.163453
AP1B1	XLOC_014188	-0.695453	0.125	0.187436
AP1B1	XLOC_005292	-0.678938	0.138073	0.202185
AP1B1	XLOC_022303	-0.639948	0.171118	0.237075
AP1B1	XLOC_019454	-0.628552	0.181336	0.247399
AP1B1	XLOC_005817	-0.595572	0.212268	0.277826
AP1B1	XLOC_009668	-0.582933	0.224644	0.289567
AP1B1	XLOC_011827	-0.571826	0.23575	0.30008
AP1B1	XLOC_005034	-0.378432	0.45945	0.498154
AP1B1	XLOC_015932	-0.194584	0.711807	0.730461
AP1B1	XLOC_009932	0.419351	0.407846	0.452465
AP1B1	XLOC_023491	0.851154	0.0315838	0.065561
AP1B1	XLOC_015281	0.878191	0.0213525	0.0481059
AP1B1	XLOC_014062	0.879363	0.0209521	0.0473878
AP1B1	XLOC_020132	0.882377	0.0199389	0.0455607
AP1B1	XLOC_022241	0.9343	0.00633285	0.0187761
AP1B1	XLOC_013593	0.951621	0.00345421	0.012098
AP1G1	XLOC_022241	-0.552016	0.256082	0.31888
AP1G1	XLOC_020132	-0.453123	0.366833	0.41635
AP1G1	XLOC_015932	-0.451591	0.36866	0.417977
AP1G1	XLOC_014062	-0.41665	0.411189	0.45541
AP1G1	XLOC_009932	-0.397752	0.434836	0.476367
AP1G1	XLOC_023491	-0.367395	0.473703	0.510802
AP1G1	XLOC_013593	-0.326475	0.527686	0.559241
AP1G1	XLOC_015281	-0.206313	0.694921	0.714583
AP1G1	XLOC_005034	-0.105387	0.842504	0.853474
AP1G1	XLOC_009668	0.0169682	0.97455	0.976426
AP1G1	XLOC_011827	0.119954	0.820932	0.833341
AP1G1	XLOC_005817	0.12292	0.816549	0.829232
AP1G1	XLOC_022303	0.162084	0.759003	0.775055
AP1G1	XLOC_019454	0.221967	0.672518	0.693556
AP1G1	XLOC_014188	0.29683	0.567832	0.595989
AP1G1	XLOC_002110	0.339347	0.510518	0.543717
AP1G1	XLOC_023728	0.340943	0.508402	0.541819
AP1G1	XLOC_005292	0.354729	0.490225	0.525482
AP1G1	XLOC_007175	0.368593	0.472149	0.509406
AP1G1	XLOC_008525	0.481312	0.333783	0.387393
AP1G1	XLOC_026943	0.907505	0.0124372	0.031446
AP1M2	XLOC_011777	-0.421229	0.405527	0.534273
AP1M2	XLOC_026943	-0.374023	0.465128	0.563702
AP1M2	XLOC_005292	-0.138606	0.793423	0.819101
AP1M2	XLOC_003704	0.158514	0.764221	0.793088
AP1M2	XLOC_017606	0.221117	0.67373	0.715326
AP1M2	XLOC_019584	0.295734	0.569331	0.633653
AP1M2	XLOC_009502	0.35117	0.494898	0.582936
AP1M2	XLOC_011194	0.363667	0.478548	0.5722
AP1M2	XLOC_002110	0.393993	0.43959	0.549081
AP1M2	XLOC_005053	0.412753	0.41603	0.537595
AP1M2	XLOC_023658	0.459235	0.359573	0.526098
AP1M2	XLOC_015754	0.579243	0.22831	0.526098
AP1M2	XLOC_015932	0.905669	0.0129277	0.0430423
AP2B1	XLOC_022241	-0.661535	0.152451	0.217782
AP2B1	XLOC_020132	-0.57733	0.23022	0.294886
AP2B1	XLOC_014062	-0.542092	0.266512	0.328311
AP2B1	XLOC_009932	-0.525856	0.283922	0.343863
AP2B1	XLOC_023491	-0.490647	0.323088	0.378076
AP2B1	XLOC_013593	-0.398251	0.434206	0.475804
AP2B1	XLOC_015932	-0.330013	0.522951	0.554937
AP2B1	XLOC_015281	-0.254916	0.625908	0.649962
AP2B1	XLOC_005034	0.0284304	0.957366	0.960503
AP2B1	XLOC_009668	0.149826	0.776942	0.791996
AP2B1	XLOC_011827	0.191277	0.716583	0.734975
AP2B1	XLOC_005817	0.247991	0.63564	0.65902
AP2B1	XLOC_022303	0.28678	0.581623	0.608775
AP2B1	XLOC_019454	0.364406	0.477586	0.514246
AP2B1	XLOC_014188	0.413939	0.414555	0.458396
AP2B1	XLOC_005292	0.443748	0.378067	0.426251
AP2B1	XLOC_023728	0.462343	0.355901	0.406758
AP2B1	XLOC_002110	0.465135	0.352614	0.403878
AP2B1	XLOC_007175	0.475258	0.340786	0.393543
AP2B1	XLOC_008525	0.596449	0.211421	0.277006
AP2B1	XLOC_026943	0.952616	0.00331461	0.0117596
AP2S1	XLOC_026943	-0.939322	0.0054111	0.0167085
AP2S1	XLOC_007175	-0.787573	0.0628952	0.111589
AP2S1	XLOC_008525	-0.779427	0.0676131	0.117866
AP2S1	XLOC_002110	-0.739745	0.0927849	0.149495
AP2S1	XLOC_005292	-0.727187	0.101488	0.159942
AP2S1	XLOC_023728	-0.691433	0.128131	0.191023
AP2S1	XLOC_019454	-0.644478	0.167126	0.233022
AP2S1	XLOC_014188	-0.636949	0.173783	0.23978
AP2S1	XLOC_022303	-0.550496	0.257669	0.320309
AP2S1	XLOC_005817	-0.50941	0.30198	0.359642
AP2S1	XLOC_009668	-0.464215	0.353696	0.404826
AP2S1	XLOC_011827	-0.360784	0.482305	0.518423
AP2S1	XLOC_005034	-0.306282	0.554943	0.584092
AP2S1	XLOC_015932	-0.00704438	0.989434	0.990202
AP2S1	XLOC_015281	0.568353	0.239267	0.30339
AP2S1	XLOC_009932	0.681767	0.135795	0.199667
AP2S1	XLOC_013593	0.72965	0.099754	0.157865
AP2S1	XLOC_023491	0.825105	0.0432075	0.0837041
AP2S1	XLOC_014062	0.851024	0.0316374	0.0656476
AP2S1	XLOC_020132	0.872589	0.0233162	0.0515908
AP2S1	XLOC_022241	0.925309	0.00815975	0.0227385
AP3M1	XLOC_014062	-0.705262	0.117503	0.178788
AP3M1	XLOC_020132	-0.682088	0.135537	0.199388
AP3M1	XLOC_023491	-0.631501	0.178668	0.244722
AP3M1	XLOC_022241	-0.583477	0.224105	0.289056
AP3M1	XLOC_009932	-0.512545	0.298505	0.356617
AP3M1	XLOC_013593	-0.453994	0.365795	0.415432
AP3M1	XLOC_015281	-0.421128	0.405651	0.450551
AP3M1	XLOC_005292	0.157901	0.765116	0.780836
AP3M1	XLOC_026943	0.216963	0.679662	0.700272
AP3M1	XLOC_007175	0.344526	0.503659	0.537542
AP3M1	XLOC_008525	0.766031	0.0757083	0.128332
AP3M1	XLOC_011827	0.793742	0.0594264	0.106892
AP3M1	XLOC_002110	0.830385	0.0407138	0.0799404
AP3M1	XLOC_023728	0.858952	0.0284387	0.0603458
AP3M1	XLOC_019454	0.878013	0.0214136	0.0482171
AP3M1	XLOC_014188	0.884628	0.0191982	0.0442114
AP3M1	XLOC_022303	0.939473	0.00538448	0.0166482
AP3M1	XLOC_005817	0.951572	0.00346107	0.0121149
AP3M1	XLOC_015932	0.957564	0.00266303	0.0101196
AP3M1	XLOC_009668	0.973691	0.00102914	0.00554817
AP3M1	XLOC_005034	0.973815	0.00101954	0.0055186
AP5B1	XLOC_002110	-0.770718	0.0728288	0.124638
AP5B1	XLOC_014188	-0.723357	0.104211	0.163183
AP5B1	XLOC_023728	-0.720445	0.106303	0.16568
AP5B1	XLOC_022303	-0.71496	0.110292	0.170383
AP5B1	XLOC_009668	-0.703482	0.118849	0.180362
AP5B1	XLOC_005817	-0.698204	0.122877	0.184998
AP5B1	XLOC_008525	-0.671442	0.144192	0.208892
AP5B1	XLOC_011827	-0.640218	0.170879	0.236836
AP5B1	XLOC_019454	-0.633143	0.177189	0.243235
AP5B1	XLOC_007175	-0.578935	0.228617	0.293354
AP5B1	XLOC_026943	-0.521506	0.288658	0.347999
AP5B1	XLOC_005034	-0.499759	0.312771	0.369074
AP5B1	XLOC_015932	-0.471556	0.345095	0.397317
AP5B1	XLOC_005292	-0.456435	0.362892	0.41286
AP5B1	XLOC_009932	0.273288	0.600274	0.626053
AP5B1	XLOC_020132	0.813902	0.048726	0.0918364
AP5B1	XLOC_022241	0.821654	0.0448748	0.0861995
AP5B1	XLOC_014062	0.83499	0.0385957	0.0766894
AP5B1	XLOC_023491	0.84063	0.0360743	0.0727414
AP5B1	XLOC_015281	0.9664	0.00167445	0.00747581
AP5B1	XLOC_013593	0.97991	0.000601353	0.00409272
APEH	XLOC_002110	-0.926988	0.00780156	0.0219742
APEH	XLOC_023728	-0.879813	0.0207994	0.0471129
APEH	XLOC_008525	-0.867918	0.0250165	0.0545295
APEH	XLOC_014188	-0.865316	0.0259882	0.0562036
APEH	XLOC_022303	-0.842811	0.0351207	0.0712444
APEH	XLOC_019454	-0.81792	0.0467113	0.0889071
APEH	XLOC_009668	-0.813213	0.0490757	0.092345
APEH	XLOC_005817	-0.811988	0.0496996	0.0932424
APEH	XLOC_007175	-0.749492	0.0862709	0.141555
APEH	XLOC_011827	-0.726444	0.102014	0.160566
APEH	XLOC_026943	-0.710992	0.113218	0.173817
APEH	XLOC_005034	-0.649388	0.162843	0.22867
APEH	XLOC_005292	-0.61614	0.192742	0.258779
APEH	XLOC_015932	-0.501451	0.310869	0.367439
APEH	XLOC_009932	0.526149	0.283605	0.343573
APEH	XLOC_015281	0.855427	0.029841	0.0626802
APEH	XLOC_023491	0.915748	0.0103486	0.0272778
APEH	XLOC_013593	0.928887	0.00740587	0.0211235
APEH	XLOC_020132	0.95341	0.00320541	0.0114889
APEH	XLOC_022241	0.958192	0.0025853	0.00992019
APEH	XLOC_014062	0.959651	0.00240926	0.00946397
API5	XLOC_020132	-0.823154	0.0441463	0.0851089
API5	XLOC_022241	-0.814975	0.0481844	0.091056
API5	XLOC_014062	-0.814818	0.0482632	0.0911696
API5	XLOC_023491	-0.695854	0.12469	0.187084
API5	XLOC_009932	-0.647817	0.164208	0.230064
API5	XLOC_013593	-0.53562	0.273401	0.334517
API5	XLOC_015281	-0.440974	0.381415	0.429174
API5	XLOC_005292	0.297812	0.566489	0.594737
API5	XLOC_015932	0.456702	0.362576	0.412582
API5	XLOC_007175	0.467497	0.349841	0.401447
API5	XLOC_005034	0.724782	0.103194	0.161962
API5	XLOC_011827	0.78061	0.0669179	0.116947
API5	XLOC_009668	0.795851	0.0582609	0.105289
API5	XLOC_026943	0.814622	0.0483622	0.0913144
API5	XLOC_019454	0.847148	0.03326	0.0682634
API5	XLOC_005817	0.859995	0.0280301	0.0596625
API5	XLOC_022303	0.879305	0.0209718	0.0474243
API5	XLOC_002110	0.897111	0.0153345	0.0370383
API5	XLOC_014188	0.932876	0.00660714	0.0193834
API5	XLOC_023728	0.935419	0.00612134	0.0183061
API5	XLOC_008525	0.959916	0.00237793	0.00938276
APOE	XLOC_005053	-0.766478	0.0754315	0.217909
APOE	XLOC_002110	-0.724334	0.103513	0.29244
APOE	XLOC_011194	-0.712563	0.112056	0.314757
APOE	XLOC_019584	-0.697225	0.123631	0.34449
APOE	XLOC_023658	-0.672755	0.143111	0.393109
APOE	XLOC_026943	-0.526641	0.28307	0.526098
APOE	XLOC_009502	-0.510666	0.300587	0.526098
APOE	XLOC_005292	-0.501944	0.310316	0.526098
APOE	XLOC_015754	-0.454749	0.364897	0.526469
APOE	XLOC_015932	-0.38769	0.4476	0.553288
APOE	XLOC_017606	-0.293392	0.57254	0.635834
APOE	XLOC_003704	-0.101073	0.848907	0.868029
APOE	XLOC_011777	0.984302	0.000367691	0.00276451
APPBP2	XLOC_022241	-0.74282	0.0907069	0.146968
APPBP2	XLOC_020132	-0.671949	0.143774	0.208448
APPBP2	XLOC_014062	-0.641284	0.169936	0.235871
APPBP2	XLOC_023491	-0.563959	0.243745	0.307569
APPBP2	XLOC_009932	-0.559329	0.248499	0.311982
APPBP2	XLOC_013593	-0.472769	0.343681	0.396073
APPBP2	XLOC_015281	-0.341136	0.508145	0.541594
APPBP2	XLOC_015932	-0.159619	0.762604	0.778472
APPBP2	XLOC_005034	0.198766	0.705778	0.724785
APPBP2	XLOC_009668	0.319641	0.536867	0.567573
APPBP2	XLOC_011827	0.374416	0.46462	0.502733
APPBP2	XLOC_005817	0.414708	0.413599	0.45755
APPBP2	XLOC_005292	0.433405	0.390597	0.43728
APPBP2	XLOC_022303	0.453814	0.36601	0.415622
APPBP2	XLOC_019454	0.497991	0.314763	0.370803
APPBP2	XLOC_007175	0.502376	0.309831	0.366526
APPBP2	XLOC_014188	0.571682	0.235896	0.300223
APPBP2	XLOC_002110	0.604015	0.20416	0.269977
APPBP2	XLOC_023728	0.609757	0.198719	0.264657
APPBP2	XLOC_008525	0.724383	0.103478	0.162298
APPBP2	XLOC_026943	0.984948	0.000338134	0.00303392
APRT,GALNS	XLOC_002110	-0.905249	0.0130413	0.0326322
APRT,GALNS	XLOC_023728	-0.857613	0.0289679	0.061241
APRT,GALNS	XLOC_014188	-0.845704	0.0338741	0.0692511
APRT,GALNS	XLOC_008525	-0.841518	0.0356848	0.0721347
APRT,GALNS	XLOC_022303	-0.822725	0.0443541	0.085421
APRT,GALNS	XLOC_005817	-0.793726	0.0594351	0.106904
APRT,GALNS	XLOC_009668	-0.793101	0.0597826	0.107375
APRT,GALNS	XLOC_019454	-0.787177	0.0631209	0.111889
APRT,GALNS	XLOC_007175	-0.724133	0.103657	0.162513
APRT,GALNS	XLOC_011827	-0.714421	0.110688	0.170848
APRT,GALNS	XLOC_026943	-0.695892	0.12466	0.187047
APRT,GALNS	XLOC_005034	-0.618068	0.190952	0.25701
APRT,GALNS	XLOC_005292	-0.59219	0.215553	0.280986
APRT,GALNS	XLOC_015932	-0.485663	0.328782	0.383047
APRT,GALNS	XLOC_009932	0.484577	0.330027	0.384127
APRT,GALNS	XLOC_015281	0.88427	0.0193151	0.0444269
APRT,GALNS	XLOC_023491	0.91015	0.011747	0.0300862
APRT,GALNS	XLOC_020132	0.937294	0.00577483	0.0175313
APRT,GALNS	XLOC_022241	0.945111	0.00443655	0.0144504
APRT,GALNS	XLOC_014062	0.945674	0.00434684	0.0142418
APRT,GALNS	XLOC_013593	0.94828	0.00394327	0.0132879
AQP9	XLOC_022241	-0.7412	0.091799	0.148302
AQP9	XLOC_020132	-0.649967	0.162341	0.228152
AQP9	XLOC_014062	-0.616974	0.191967	0.258021
AQP9	XLOC_023491	-0.55406	0.253953	0.31692
AQP9	XLOC_013593	-0.529374	0.280115	0.340486
AQP9	XLOC_009932	-0.488152	0.325933	0.380553
AQP9	XLOC_015281	-0.401917	0.429586	0.471674
AQP9	XLOC_015932	-0.271666	0.602526	0.628137
AQP9	XLOC_005034	0.0781564	0.883004	0.89131
AQP9	XLOC_009668	0.220686	0.674345	0.69528
AQP9	XLOC_011827	0.296149	0.568763	0.596859
AQP9	XLOC_005817	0.299744	0.56385	0.5923
AQP9	XLOC_022303	0.349809	0.496689	0.531267
AQP9	XLOC_019454	0.407793	0.422217	0.465198
AQP9	XLOC_014188	0.470264	0.346603	0.398627
AQP9	XLOC_023728	0.517656	0.292873	0.35169
AQP9	XLOC_002110	0.541497	0.267143	0.32888
AQP9	XLOC_005292	0.542537	0.266042	0.327884
AQP9	XLOC_007175	0.579528	0.228026	0.292794
AQP9	XLOC_008525	0.642415	0.168939	0.234867
AQP9	XLOC_026943	0.977665	0.000742727	0.00459895
AQR	XLOC_022241	-0.848207	0.032813	0.067546
AQR	XLOC_020132	-0.828188	0.0417432	0.0814889
AQR	XLOC_014062	-0.810635	0.0503933	0.0942508
AQR	XLOC_023491	-0.711599	0.112769	0.17329
AQR	XLOC_009932	-0.684633	0.133502	0.197108
AQR	XLOC_013593	-0.550315	0.257858	0.320485
AQR	XLOC_015281	-0.424784	0.401149	0.446568
AQR	XLOC_015932	0.238098	0.649601	0.672093
AQR	XLOC_005292	0.391546	0.442695	0.483297
AQR	XLOC_007175	0.528331	0.281241	0.341485
AQR	XLOC_005034	0.556854	0.251055	0.314302
AQR	XLOC_011827	0.634838	0.175669	0.241699
AQR	XLOC_009668	0.654091	0.158785	0.224464
AQR	XLOC_005817	0.733963	0.0967488	0.154258
AQR	XLOC_022303	0.760116	0.0794147	0.133019
AQR	XLOC_019454	0.770142	0.0731796	0.125095
AQR	XLOC_002110	0.836973	0.0377002	0.0752963
AQR	XLOC_014188	0.841929	0.0355049	0.0718503
AQR	XLOC_023728	0.862221	0.0271667	0.0582112
AQR	XLOC_008525	0.924985	0.00822989	0.0228882
AQR	XLOC_026943	0.931485	0.0068807	0.0199807
ARC	XLOC_026943	-0.565736	0.24193	0.305887
ARC	XLOC_005292	-0.414024	0.414449	0.458301
ARC	XLOC_007175	-0.406367	0.424002	0.466766
ARC	XLOC_008525	-0.401912	0.429593	0.471678
ARC	XLOC_019454	-0.388728	0.446278	0.486493
ARC	XLOC_023728	-0.29294	0.573159	0.600932
ARC	XLOC_002110	-0.286145	0.582497	0.609584
ARC	XLOC_014188	-0.222678	0.671504	0.692615
ARC	XLOC_015281	-0.170446	0.746807	0.763501
ARC	XLOC_005817	-0.159423	0.762892	0.778744
ARC	XLOC_022303	-0.150285	0.776269	0.791364
ARC	XLOC_009668	-0.0885503	0.867522	0.876838
ARC	XLOC_005034	-0.066788	0.899967	0.907107
ARC	XLOC_013593	0.0676453	0.898687	0.905914
ARC	XLOC_015932	0.188382	0.72077	0.738922
ARC	XLOC_011827	0.269006	0.606225	0.631576
ARC	XLOC_014062	0.430354	0.394321	0.440573
ARC	XLOC_022241	0.45568	0.363789	0.413665
ARC	XLOC_020132	0.458235	0.360757	0.410993
ARC	XLOC_023491	0.487954	0.32616	0.380761
ARC	XLOC_009932	0.830395	0.0407095	0.079934
AREG	XLOC_022241	-0.639765	0.17128	0.237239
AREG	XLOC_020132	-0.527451	0.282193	0.342327
AREG	XLOC_014062	-0.489687	0.324181	0.379023
AREG	XLOC_013593	-0.464657	0.353175	0.404372
AREG	XLOC_023491	-0.413859	0.414654	0.458487
AREG	XLOC_015932	-0.4016	0.429986	0.472031
AREG	XLOC_015281	-0.361573	0.481275	0.517503
AREG	XLOC_009932	-0.344952	0.503096	0.537027
AREG	XLOC_005034	-0.0548002	0.917882	0.92376
AREG	XLOC_009668	0.0793786	0.881182	0.889612
AREG	XLOC_005817	0.145896	0.782709	0.797444
AREG	XLOC_022303	0.208598	0.691641	0.711507
AREG	XLOC_011827	0.240759	0.645839	0.668585
AREG	XLOC_019454	0.259453	0.619553	0.644004
AREG	XLOC_014188	0.331318	0.521208	0.553362
AREG	XLOC_023728	0.380081	0.457332	0.496301
AREG	XLOC_002110	0.418681	0.408675	0.453197
AREG	XLOC_008525	0.516778	0.293839	0.352557
AREG	XLOC_005292	0.551145	0.256991	0.319699
AREG	XLOC_007175	0.557026	0.250878	0.314142
AREG	XLOC_026943	0.926316	0.00794389	0.0222794
ARF5	XLOC_002110	-0.807556	0.0519884	0.0965276
ARF5	XLOC_023728	-0.744649	0.0894812	0.145472
ARF5	XLOC_008525	-0.744278	0.089729	0.145774
ARF5	XLOC_014188	-0.729024	0.100194	0.158389
ARF5	XLOC_026943	-0.719829	0.106748	0.166218
ARF5	XLOC_007175	-0.716423	0.109222	0.169133
ARF5	XLOC_022303	-0.690469	0.128886	0.191889
ARF5	XLOC_005817	-0.652999	0.159724	0.225443
ARF5	XLOC_009668	-0.648799	0.163354	0.229192
ARF5	XLOC_019454	-0.646913	0.164996	0.230872
ARF5	XLOC_011827	-0.634456	0.176011	0.242051
ARF5	XLOC_005292	-0.612542	0.196102	0.262076
ARF5	XLOC_005034	-0.442849	0.379151	0.427196
ARF5	XLOC_015932	-0.309873	0.550068	0.579626
ARF5	XLOC_009932	0.36281	0.479663	0.516079
ARF5	XLOC_023491	0.856096	0.0295726	0.0622357
ARF5	XLOC_020132	0.87497	0.0224715	0.0501063
ARF5	XLOC_014062	0.88043	0.0205906	0.0467399
ARF5	XLOC_022241	0.912711	0.0110966	0.0287912
ARF5	XLOC_015281	0.933899	0.0064096	0.0189472
ARF5	XLOC_013593	0.982117	0.000476826	0.00361472
ARFGAP1	XLOC_002110	-0.910206	0.0117325	0.0300583
ARFGAP1	XLOC_008525	-0.904472	0.0132525	0.0330458
ARFGAP1	XLOC_023728	-0.86831	0.0248716	0.0542804
ARFGAP1	XLOC_019454	-0.845587	0.0339242	0.0693314
ARFGAP1	XLOC_026943	-0.84115	0.035846	0.0723866
ARFGAP1	XLOC_014188	-0.828826	0.0414429	0.0810348
ARFGAP1	XLOC_007175	-0.819166	0.0460948	0.0880018
ARFGAP1	XLOC_022303	-0.780806	0.0668032	0.116799
ARFGAP1	XLOC_005817	-0.750771	0.0854321	0.140513
ARFGAP1	XLOC_009668	-0.729622	0.0997734	0.157888
ARFGAP1	XLOC_005292	-0.709632	0.114229	0.174999
ARFGAP1	XLOC_005034	-0.586575	0.221049	0.286167
ARFGAP1	XLOC_011827	-0.554725	0.253263	0.316292
ARFGAP1	XLOC_015932	-0.348587	0.498298	0.532719
ARFGAP1	XLOC_015281	0.667964	0.147068	0.212013
ARFGAP1	XLOC_009932	0.748473	0.0869423	0.14238
ARFGAP1	XLOC_013593	0.816295	0.0475214	0.0900974
ARFGAP1	XLOC_023491	0.947041	0.00413266	0.0137358
ARFGAP1	XLOC_014062	0.979609	0.000619443	0.0041604
ARFGAP1	XLOC_020132	0.987438	0.000235731	0.00255428
ARFGAP1	XLOC_022241	0.996375	1.96813e-05	0.000988499
ARFGEF1	XLOC_022241	-0.630256	0.179792	0.245848
ARFGEF1	XLOC_020132	-0.535102	0.273956	0.335005
ARFGEF1	XLOC_014062	-0.49988	0.312635	0.368947
ARFGEF1	XLOC_023491	-0.449263	0.371444	0.420443
ARFGEF1	XLOC_009932	-0.448315	0.37258	0.421428
ARFGEF1	XLOC_013593	-0.404579	0.426244	0.468736
ARFGEF1	XLOC_015932	-0.386614	0.448972	0.488902
ARFGEF1	XLOC_015281	-0.276884	0.595288	0.621409
ARFGEF1	XLOC_005034	-0.0368804	0.944704	0.948716
ARFGEF1	XLOC_009668	0.094548	0.8586	0.868523
ARFGEF1	XLOC_011827	0.175768	0.739063	0.756174
ARFGEF1	XLOC_005817	0.192711	0.714512	0.733017
ARFGEF1	XLOC_022303	0.234592	0.654567	0.676754
ARFGEF1	XLOC_019454	0.298295	0.565828	0.59414
ARFGEF1	XLOC_014188	0.365219	0.476529	0.513287
ARFGEF1	XLOC_023728	0.411635	0.417422	0.460941
ARFGEF1	XLOC_002110	0.418595	0.408781	0.453288
ARFGEF1	XLOC_005292	0.427105	0.398299	0.444062
ARFGEF1	XLOC_007175	0.449898	0.370684	0.419761
ARFGEF1	XLOC_008525	0.547279	0.26104	0.323372
ARFGEF1	XLOC_026943	0.941373	0.00505493	0.0158919
ARFGEF3	XLOC_011777	-0.50296	0.309177	0.526098
ARFGEF3	XLOC_026943	-0.433295	0.390732	0.530481
ARFGEF3	XLOC_005292	-0.187796	0.721618	0.756232
ARFGEF3	XLOC_019584	0.0780916	0.883101	0.898282
ARFGEF3	XLOC_011194	0.146147	0.782341	0.809117
ARFGEF3	XLOC_002110	0.171207	0.745699	0.7768
ARFGEF3	XLOC_005053	0.213925	0.684007	0.724082
ARFGEF3	XLOC_023658	0.228854	0.662712	0.706337
ARFGEF3	XLOC_003704	0.55938	0.248447	0.526098
ARFGEF3	XLOC_017606	0.627179	0.182583	0.479647
ARFGEF3	XLOC_015932	0.64156	0.169693	0.453736
ARFGEF3	XLOC_009502	0.727072	0.101569	0.287375
ARFGEF3	XLOC_015754	0.864423	0.0263256	0.0825656
ARHGAP15	XLOC_022241	-0.763064	0.0775574	0.130669
ARHGAP15	XLOC_020132	-0.685629	0.132709	0.196215
ARHGAP15	XLOC_014062	-0.656418	0.156794	0.222384
ARHGAP15	XLOC_023491	-0.614925	0.193874	0.259894
ARHGAP15	XLOC_011777	-0.590407	0.217291	0.526098
ARHGAP15	XLOC_009932	-0.560932	0.246849	0.310458
ARHGAP15	XLOC_013593	-0.536448	0.272516	0.333722
ARHGAP15	XLOC_015281	-0.393659	0.440014	0.480921
ARHGAP15	XLOC_015932	-0.305526	0.555971	0.624502
ARHGAP15	XLOC_015932	-0.226246	0.666421	0.687845
ARHGAP15	XLOC_003704	-0.140515	0.790615	0.81658
ARHGAP15	XLOC_015754	-0.0784879	0.88251	0.89773
ARHGAP15	XLOC_017606	-0.0126115	0.981084	0.983508
ARHGAP15	XLOC_009502	0.0996257	0.851056	0.869947
ARHGAP15	XLOC_005034	0.113804	0.830031	0.841858
ARHGAP15	XLOC_009668	0.261763	0.616323	0.640978
ARHGAP15	XLOC_011827	0.270774	0.603765	0.629301
ARHGAP15	XLOC_005817	0.354287	0.490805	0.526007
ARHGAP15	XLOC_022303	0.391168	0.443175	0.483724
ARHGAP15	XLOC_023658	0.424687	0.401268	0.532944
ARHGAP15	XLOC_005292	0.44011	0.382459	0.528844
ARHGAP15	XLOC_019454	0.457092	0.362112	0.41217
ARHGAP15	XLOC_002110	0.468678	0.348458	0.526098
ARHGAP15	XLOC_005053	0.482323	0.332618	0.526098
ARHGAP15	XLOC_005292	0.494599	0.318597	0.374166
ARHGAP15	XLOC_014188	0.511561	0.299595	0.35756
ARHGAP15	XLOC_011194	0.51579	0.294926	0.526098
ARHGAP15	XLOC_019584	0.537667	0.271215	0.526098
ARHGAP15	XLOC_007175	0.544767	0.263685	0.325758
ARHGAP15	XLOC_023728	0.557737	0.250142	0.313473
ARHGAP15	XLOC_002110	0.567807	0.239821	0.303914
ARHGAP15	XLOC_008525	0.675201	0.14111	0.205532
ARHGAP15	XLOC_026943	0.919831	0.00938305	0.0322907
ARHGAP15	XLOC_026943	0.980064	0.00059219	0.0040581
ARHGAP31	XLOC_022241	-0.686117	0.132322	0.195776
ARHGAP31	XLOC_020132	-0.603747	0.204415	0.270232
ARHGAP31	XLOC_014062	-0.573427	0.234137	0.298567
ARHGAP31	XLOC_023491	-0.51834	0.292123	0.351039
ARHGAP31	XLOC_009932	-0.490316	0.323464	0.378407
ARHGAP31	XLOC_013593	-0.45629	0.363065	0.413014
ARHGAP31	XLOC_015281	-0.331458	0.521021	0.55319
ARHGAP31	XLOC_015932	-0.271861	0.602256	0.627893
ARHGAP31	XLOC_005034	0.0719664	0.892237	0.899901
ARHGAP31	XLOC_009668	0.20945	0.690419	0.71035
ARHGAP31	XLOC_011827	0.274163	0.599059	0.624914
ARHGAP31	XLOC_005817	0.3151	0.542993	0.573167
ARHGAP31	XLOC_022303	0.350318	0.496019	0.530672
ARHGAP31	XLOC_005292	0.383557	0.452879	0.492361
ARHGAP31	XLOC_019454	0.392611	0.441343	0.482093
ARHGAP31	XLOC_007175	0.435938	0.387516	0.434557
ARHGAP31	XLOC_014188	0.47718	0.338557	0.391569
ARHGAP31	XLOC_002110	0.509141	0.30228	0.359898
ARHGAP31	XLOC_023728	0.515585	0.295151	0.353724
ARHGAP31	XLOC_008525	0.635907	0.174713	0.240734
ARHGAP31	XLOC_026943	0.965527	0.00176211	0.0077214
[truncated: 36,693 more rows]

## Sheet: KASHMIRI
GENE	LNCRNA	CORELLATION	P-VALUE	ADJUSTED P VALUE
AACS	XLOC_011194	-0.879666	0.0208493	0.0686466						Highly expressed genes in both
AACS	XLOC_023658	-0.847901	0.0329419	0.0858224						CSN1S1
AACS	XLOC_002110	-0.829031	0.0413469	0.0964959						CSN1S2
AACS	XLOC_019584	-0.816349	0.0474943	0.103764						CSN3
AACS	XLOC_005053	-0.80232	0.0547536	0.11204						CSN2
AACS	XLOC_026943	-0.652749	0.159939	0.215004						LGB
AACS	XLOC_015932	-0.531813	0.277486	0.322682						LALBA
AACS	XLOC_005292	-0.233626	0.655937	0.678288						RPLP1
AACS	XLOC_011777	0.391458	0.442807	0.476425						RPS28
AACS	XLOC_015754	0.402087	0.429373	0.463824						RPS20/snoU54
AACS	XLOC_009502	0.445192	0.37633	0.41423						RPLPO
AACS	XLOC_017606	0.615999	0.192874	0.245306						RPS12
AACS	XLOC_003704	0.735682	0.095563	0.154179						B2M
AAGAB	XLOC_023658	-0.676789	0.139816	0.196244						CCL14
AAGAB	XLOC_011194	-0.653998	0.158865	0.214009
AAGAB	XLOC_019584	-0.585003	0.222598	0.272507
AAGAB	XLOC_002110	-0.566761	0.240885	0.289158
AAGAB	XLOC_005053	-0.519627	0.290712	0.334843
AAGAB	XLOC_026943	-0.501006	0.311369	0.353909
AAGAB	XLOC_015932	-0.388366	0.44674	0.480118
AAGAB	XLOC_011777	0.0221565	0.966771	0.96951
AAGAB	XLOC_005292	0.171885	0.744711	0.762479
AAGAB	XLOC_015754	0.476767	0.339036	0.379483
AAGAB	XLOC_009502	0.612907	0.19576	0.247974
AAGAB	XLOC_017606	0.698366	0.122752	0.180256
AAGAB	XLOC_003704	0.729591	0.0997955	0.158273
AAK1,ENSBTAG00000047822	XLOC_013668	-0.570538	0.237052	0.556643
AAK1,ENSBTAG00000047822	XLOC_020482	-0.531051	0.278306	0.610253
AAK1,ENSBTAG00000047822	XLOC_023658	-0.415048	0.413177	0.448706
AAK1,ENSBTAG00000047822	XLOC_011194	-0.395923	0.437146	0.471094
AAK1,ENSBTAG00000047822	XLOC_026943	-0.32843	0.525069	0.55404
AAK1,ENSBTAG00000047822	XLOC_019584	-0.297429	0.567012	0.593801
AAK1,ENSBTAG00000047822	XLOC_002110	-0.284945	0.584151	0.61011
AAK1,ENSBTAG00000047822	XLOC_011777	-0.244824	0.640101	0.663291
AAK1,ENSBTAG00000047822	XLOC_005053	-0.232858	0.657027	0.679322
AAK1,ENSBTAG00000047822	XLOC_015932	-0.213277	0.684935	0.705818
AAK1,ENSBTAG00000047822	XLOC_000504	0.00941187	0.985883	0.996472
AAK1,ENSBTAG00000047822	XLOC_013477	0.225621	0.66731	0.871922
AAK1,ENSBTAG00000047822	XLOC_005292	0.395887	0.437193	0.471132
AAK1,ENSBTAG00000047822	XLOC_015754	0.53731	0.271596	0.317276
AAK1,ENSBTAG00000047822	XLOC_009502	0.628456	0.181423	0.234795
AAK1,ENSBTAG00000047822	XLOC_003704	0.631063	0.179063	0.232601
AAK1,ENSBTAG00000047822	XLOC_017606	0.642276	0.169061	0.22337
AAK1,ENSBTAG00000047822	XLOC_012808	0.957015	0.0027318	0.0203564
AAK1,ENSBTAG00000047822	XLOC_019155	0.971504	0.00120647	0.010935
ABCC1	XLOC_003704	-0.654905	0.158087	0.213286
ABCC1	XLOC_011777	-0.612326	0.196305	0.248478
ABCC1	XLOC_017606	-0.510597	0.300664	0.343974
ABCC1	XLOC_009502	-0.30106	0.562054	0.589106
ABCC1	XLOC_015754	-0.275819	0.596764	0.622069
ABCC1	XLOC_015932	0.569025	0.238585	0.287086
ABCC1	XLOC_026943	0.573562	0.234	0.282945
ABCC1	XLOC_005292	0.775288	0.0700698	0.128525
ABCC1	XLOC_023658	0.7816	0.0663392	0.124596
ABCC1	XLOC_011194	0.837176	0.037609	0.0918346
ABCC1	XLOC_019584	0.877447	0.0216085	0.069827
ABCC1	XLOC_005053	0.890479	0.0173355	0.0628774
ABCC1	XLOC_002110	0.894505	0.0161069	0.0607847
ABCD1	XLOC_011194	-0.901251	0.0141456	0.0572342
ABCD1	XLOC_023658	-0.886001	0.0187528	0.065259
ABCD1	XLOC_002110	-0.881177	0.0203396	0.0678508
ABCD1	XLOC_019584	-0.870507	0.024067	0.0735233
ABCD1	XLOC_005053	-0.851363	0.0314974	0.0839208
ABCD1	XLOC_015932	-0.633852	0.176553	0.230302
ABCD1	XLOC_026943	-0.597279	0.210619	0.261561
ABCD1	XLOC_005292	-0.324712	0.530051	0.558744
ABCD1	XLOC_011777	0.385726	0.450106	0.483283
ABCD1	XLOC_015754	0.41953	0.407624	0.443477
ABCD1	XLOC_009502	0.52339	0.286603	0.331061
ABCD1	XLOC_017606	0.704036	0.118429	0.176149
ABCD1	XLOC_003704	0.812394	0.0494924	0.10608
ABCD4	XLOC_019584	-0.855084	0.0299792	0.0819111
ABCD4	XLOC_023658	-0.850851	0.0317094	0.0841934
ABCD4	XLOC_011194	-0.839553	0.0365497	0.0904641
ABCD4	XLOC_002110	-0.829074	0.0413267	0.0964702
ABCD4	XLOC_005053	-0.79164	0.0605979	0.118458
ABCD4	XLOC_026943	-0.614715	0.19407	0.246426
ABCD4	XLOC_015932	-0.537418	0.271481	0.317174
ABCD4	XLOC_005292	-0.305431	0.556101	0.583429
ABCD4	XLOC_011777	0.292319	0.57401	0.600472
ABCD4	XLOC_015754	0.45557	0.36392	0.402675
ABCD4	XLOC_009502	0.624585	0.18495	0.238085
ABCD4	XLOC_017606	0.781246	0.0665459	0.124811
ABCD4	XLOC_003704	0.850201	0.0319788	0.0845457
ABCG2	XLOC_011194	-0.692939	0.126954	0.184192
ABCG2	XLOC_019584	-0.68586	0.132525	0.18943
ABCG2	XLOC_002110	-0.667787	0.147215	0.203149
ABCG2	XLOC_023658	-0.64599	0.165802	0.220383
ABCG2	XLOC_026943	-0.625623	0.184001	0.237201
ABCG2	XLOC_005053	-0.621657	0.187636	0.240539
ABCG2	XLOC_005292	-0.335832	0.51519	0.54468
ABCG2	XLOC_015932	-0.326252	0.527985	0.556803
ABCG2	XLOC_011777	0.0678524	0.898378	0.906446
ABCG2	XLOC_015754	0.755713	0.0822249	0.140953
ABCG2	XLOC_009502	0.792306	0.0602256	0.118057
ABCG2	XLOC_017606	0.90048	0.0143636	0.0576479
ABCG2	XLOC_003704	0.959948	0.00237411	0.0282298
ABHD11	XLOC_005053	-0.543744	0.264765	0.310994
ABHD11	XLOC_011194	-0.518079	0.292409	0.336383
ABHD11	XLOC_002110	-0.509293	0.30211	0.345285
ABHD11	XLOC_019584	-0.444196	0.377528	0.415361
ABHD11	XLOC_023658	-0.438142	0.384842	0.422197
ABHD11	XLOC_009502	-0.403657	0.427401	0.461958
ABHD11	XLOC_005292	-0.381284	0.455789	0.488631
ABHD11	XLOC_026943	-0.350217	0.496152	0.526687
ABHD11	XLOC_015932	-0.310815	0.54879	0.576493
ABHD11	XLOC_017606	-0.241909	0.644215	0.667167
ABHD11	XLOC_015754	-0.241433	0.644887	0.667821
ABHD11	XLOC_003704	-0.0656859	0.901613	0.909414
ABHD11	XLOC_011777	0.708186	0.115308	0.173193
ABHD17C	XLOC_020482	-0.8678	0.0250599	0.114434
ABHD17C	XLOC_000504	-0.761328	0.0786488	0.268969
ABHD17C	XLOC_023658	-0.742108	0.0911864	0.149863
ABHD17C	XLOC_011194	-0.73171	0.0983136	0.156847
ABHD17C	XLOC_019584	-0.718461	0.107738	0.165915
ABHD17C	XLOC_013477	-0.716322	0.109295	0.340107
ABHD17C	XLOC_026943	-0.710623	0.113492	0.171498
ABHD17C	XLOC_002110	-0.664982	0.149555	0.205332
ABHD17C	XLOC_005053	-0.624836	0.18472	0.237865
ABHD17C	XLOC_013668	-0.573084	0.234482	0.552748
ABHD17C	XLOC_015932	-0.267893	0.607773	0.632526
ABHD17C	XLOC_005292	-0.0549585	0.917645	0.924281
ABHD17C	XLOC_011777	0.189698	0.718866	0.738021
ABHD17C	XLOC_012808	0.221055	0.673819	0.874529
ABHD17C	XLOC_019155	0.279018	0.592334	0.839836
ABHD17C	XLOC_015754	0.449967	0.370602	0.408896
ABHD17C	XLOC_009502	0.57258	0.23499	0.283859
ABHD17C	XLOC_017606	0.683332	0.13454	0.191317
ABHD17C	XLOC_003704	0.732534	0.0977399	0.156295
ABLIM1	XLOC_011777	-0.594542	0.213266	0.263981
ABLIM1	XLOC_003704	-0.505819	0.30598	0.348865
ABLIM1	XLOC_017606	-0.370566	0.469594	0.501659
ABLIM1	XLOC_015754	-0.227253	0.664988	0.686861
ABLIM1	XLOC_009502	-0.18832	0.72086	0.739912
ABLIM1	XLOC_015932	0.381179	0.455924	0.488759
ABLIM1	XLOC_026943	0.497095	0.315774	0.357989
ABLIM1	XLOC_023658	0.565679	0.241988	0.290169
ABLIM1	XLOC_011194	0.643988	0.167555	0.221996
ABLIM1	XLOC_019584	0.725117	0.102956	0.161312
ABLIM1	XLOC_002110	0.735938	0.0953865	0.154007
ABLIM1	XLOC_005053	0.743853	0.0900137	0.148725
ABLIM1	XLOC_005292	0.931252	0.006927	0.0421196
ABLIM3	XLOC_013668	-0.442794	0.379217	0.703883
ABLIM3	XLOC_020482	-0.293375	0.572562	0.830078
ABLIM3	XLOC_000504	0.229773	0.661406	0.87008
ABLIM3	XLOC_013477	0.451077	0.369275	0.695672
ABLIM3	XLOC_019155	0.997592	8.69121e-06	0.000308094
ABLIM3	XLOC_012808	0.999138	1.11317e-06	7.20507e-05
ACAP1,ENSBTAG00000045892	XLOC_013668	-0.284385	0.584922	0.836503
ACAP1,ENSBTAG00000045892	XLOC_012808	-0.219435	0.676131	0.875419
ACAP1,ENSBTAG00000045892	XLOC_019155	-0.190712	0.7174	0.895772
ACAP1,ENSBTAG00000045892	XLOC_000504	-0.0730195	0.890665	0.972047
ACAP1,ENSBTAG00000045892	XLOC_013477	0.118151	0.823598	0.943189
ACAP1,ENSBTAG00000045892	XLOC_020482	0.38918	0.445703	0.750165
ACCS	XLOC_011194	-0.64521	0.166484	0.221004
ACCS	XLOC_002110	-0.63976	0.171285	0.225428
ACCS	XLOC_005053	-0.621001	0.18824	0.241086
ACCS	XLOC_019584	-0.603091	0.205041	0.256506
ACCS	XLOC_023658	-0.556933	0.250974	0.298409
ACCS	XLOC_026943	-0.491434	0.322191	0.363883
ACCS	XLOC_005292	-0.470624	0.346183	0.38612
ACCS	XLOC_003497	-0.413946	0.414546	0.588921
ACCS	XLOC_015932	-0.386948	0.448547	0.48181
ACCS	XLOC_019200	-0.268484	0.606951	0.73331
ACCS	XLOC_021768	0.0877339	0.868737	0.918082
ACCS	XLOC_003635	0.144418	0.784878	0.860946
ACCS	XLOC_012115	0.146552	0.781745	0.858792
ACCS	XLOC_011737	0.163662	0.756699	0.841495
ACCS	XLOC_002731	0.18754	0.721988	0.816177
ACCS	XLOC_017447	0.232177	0.657993	0.769362
ACCS	XLOC_019411	0.233497	0.65612	0.76799
ACCS	XLOC_011777	0.271718	0.602453	0.627501
ACCS	XLOC_013668	0.301002	0.562133	0.702093
ACCS	XLOC_009502	0.442046	0.380119	0.41779
ACCS	XLOC_015754	0.52427	0.285646	0.330171
ACCS	XLOC_017606	0.577062	0.230488	0.279707
ACCS	XLOC_003704	0.693542	0.126484	0.183738
ACHE,UFSP1	XLOC_011194	-0.91638	0.0101961	0.0495092
ACHE,UFSP1	XLOC_002110	-0.897459	0.0152329	0.0592236
ACHE,UFSP1	XLOC_019584	-0.88689	0.0184674	0.0647962
ACHE,UFSP1	XLOC_023658	-0.876558	0.0219164	0.070292
ACHE,UFSP1	XLOC_005053	-0.874122	0.0227706	0.0716069
ACHE,UFSP1	XLOC_026943	-0.674807	0.141431	0.197742
ACHE,UFSP1	XLOC_015932	-0.565365	0.242308	0.290461
ACHE,UFSP1	XLOC_005292	-0.420572	0.406337	0.442284
ACHE,UFSP1	XLOC_015754	0.413571	0.415012	0.450399
ACHE,UFSP1	XLOC_009502	0.459863	0.35883	0.397904
ACHE,UFSP1	XLOC_011777	0.463402	0.354653	0.393993
ACHE,UFSP1	XLOC_017606	0.649949	0.162357	0.217228
ACHE,UFSP1	XLOC_003704	0.779562	0.0675334	0.125852
ACKR3	XLOC_013668	-0.339972	0.509688	0.793201
ACKR3	XLOC_012808	-0.324805	0.529926	0.804941
ACKR3	XLOC_000504	-0.286545	0.581946	0.834942
ACKR3	XLOC_019155	-0.281887	0.588368	0.838177
ACKR3	XLOC_013477	-0.102661	0.846549	0.953241
ACKR3	XLOC_020482	0.328708	0.524697	0.802093
ACO1	XLOC_011194	-0.766005	0.0757244	0.134362
ACO1	XLOC_023658	-0.749342	0.0863698	0.145099
ACO1	XLOC_019584	-0.711564	0.112795	0.170833
ACO1	XLOC_002110	-0.707122	0.116105	0.173946
ACO1	XLOC_005053	-0.664139	0.150261	0.205992
ACO1	XLOC_026943	-0.59212	0.215621	0.26614
ACO1	XLOC_015932	-0.451425	0.368859	0.407283
ACO1	XLOC_005292	-0.108892	0.837308	0.849464
ACO1	XLOC_011777	0.144269	0.785098	0.800477
ACO1	XLOC_015754	0.573472	0.234091	0.283031
ACO1	XLOC_009502	0.653739	0.159087	0.214221
ACO1	XLOC_017606	0.777312	0.0688636	0.127252
ACO1	XLOC_003704	0.847233	0.033224	0.0862229
ACOX2	XLOC_020482	-0.7898	0.0616322	0.225819
ACOX2	XLOC_013668	-0.637528	0.173267	0.45957
ACOX2	XLOC_000504	-0.445537	0.375915	0.70129
ACOX2	XLOC_013477	-0.306026	0.555291	0.820729
ACOX2	XLOC_012808	0.67402	0.142075	0.405065
ACOX2	XLOC_019155	0.715399	0.10997	0.341549
ACSS2	XLOC_011194	-0.653697	0.159123	0.214254
ACSS2	XLOC_023658	-0.603867	0.204301	0.255817
ACSS2	XLOC_002110	-0.578621	0.228931	0.278288
ACSS2	XLOC_005053	-0.572546	0.235023	0.283887
ACSS2	XLOC_019584	-0.524676	0.285204	0.329766
ACSS2	XLOC_026943	-0.433295	0.390732	0.427661
ACSS2	XLOC_015932	-0.42875	0.396283	0.43288
ACSS2	XLOC_005292	-0.036291	0.945587	0.950014
ACSS2	XLOC_009502	0.0823031	0.876824	0.886325
ACSS2	XLOC_015754	0.149194	0.77787	0.793707
ACSS2	XLOC_017606	0.21901	0.676738	0.698027
ACSS2	XLOC_003704	0.351041	0.495068	0.525655
ACSS2	XLOC_011777	0.388047	0.447146	0.480493
ADAM28,ADAMDEC1	XLOC_013668	-0.505475	0.306363	0.48826
ADAM28,ADAMDEC1	XLOC_003497	-0.111524	0.833408	0.89432
ADAM28,ADAMDEC1	XLOC_019200	0.270142	0.604644	0.73191
ADAM28,ADAMDEC1	XLOC_012115	0.951122	0.00352525	0.016246
ADAM28,ADAMDEC1	XLOC_021768	0.979764	0.000610083	0.00416287
ADAM28,ADAMDEC1	XLOC_003635	0.994267	4.9206e-05	0.000618682
ADAM28,ADAMDEC1	XLOC_019411	0.997126	1.23783e-05	0.000232482
ADAM28,ADAMDEC1	XLOC_017447	0.998517	3.29884e-06	9.56221e-05
ADAM28,ADAMDEC1	XLOC_011737	0.99886	1.94723e-06	6.87188e-05
ADAM28,ADAMDEC1	XLOC_002731	0.999205	9.47819e-07	4.43453e-05
ADAMTS8	XLOC_011194	-0.982421	0.00046082	0.0176403
ADAMTS8	XLOC_019584	-0.979147	0.000647735	0.0191295
ADAMTS8	XLOC_002110	-0.976533	0.00081959	0.0204265
ADAMTS8	XLOC_005053	-0.962674	0.0020638	0.0270254
ADAMTS8	XLOC_023658	-0.955192	0.00296664	0.0305142
ADAMTS8	XLOC_026943	-0.741217	0.0917879	0.150474
ADAMTS8	XLOC_019200	-0.603313	0.20483	0.384772
ADAMTS8	XLOC_021768	-0.601292	0.206761	0.387135
ADAMTS8	XLOC_012115	-0.580216	0.227341	0.410292
ADAMTS8	XLOC_015932	-0.579566	0.227988	0.277431
ADAMTS8	XLOC_003635	-0.56435	0.243345	0.427505
ADAMTS8	XLOC_003497	-0.559252	0.248579	0.432918
ADAMTS8	XLOC_002731	-0.523405	0.286586	0.469119
ADAMTS8	XLOC_011737	-0.52243	0.28765	0.470115
ADAMTS8	XLOC_005292	-0.498636	0.314036	0.356404
ADAMTS8	XLOC_017447	-0.461831	0.356505	0.536404
ADAMTS8	XLOC_019411	-0.45936	0.359426	0.539178
ADAMTS8	XLOC_015754	0.256418	0.623803	0.647777
ADAMTS8	XLOC_009502	0.330266	0.522613	0.551711
ADAMTS8	XLOC_017606	0.547527	0.26078	0.307376
ADAMTS8	XLOC_011777	0.630878	0.17923	0.232748
ADAMTS8	XLOC_003704	0.69223	0.127508	0.184711
ADAMTS8	XLOC_013668	0.963977	0.00192307	0.0101405
ADAP2	XLOC_013668	-0.564612	0.243077	0.427318
ADAP2	XLOC_003497	0.011763	0.982356	0.98952
ADAP2	XLOC_019200	0.244852	0.640062	0.756033
ADAP2	XLOC_012115	0.929524	0.00727528	0.0292192
ADAP2	XLOC_019411	0.979965	0.000598103	0.00410118
ADAP2	XLOC_017447	0.984114	0.000376559	0.00288213
ADAP2	XLOC_011737	0.99568	2.79579e-05	0.000410978
ADAP2	XLOC_002731	0.996017	2.37597e-05	0.000367034
ADAP2	XLOC_021768	0.996775	1.55809e-05	0.00027263
ADAP2	XLOC_003635	0.99973	1.09145e-07	1.47103e-05
ADARB1	XLOC_011194	-0.605232	0.203002	0.254618
ADARB1	XLOC_005053	-0.592748	0.215009	0.265593
ADARB1	XLOC_002110	-0.57438	0.233178	0.282206
ADARB1	XLOC_019584	-0.523247	0.286759	0.331197
ADARB1	XLOC_023658	-0.51158	0.299574	0.34297
ADARB1	XLOC_026943	-0.50061	0.311814	0.354311
ADARB1	XLOC_005292	-0.373764	0.465461	0.497721
ADARB1	XLOC_015932	-0.278186	0.593485	0.618965
ADARB1	XLOC_009502	-0.165085	0.754621	0.771828
ADARB1	XLOC_017606	-0.00660056	0.990099	0.990984
ADARB1	XLOC_015754	0.0052084	0.992187	0.992902
ADARB1	XLOC_003704	0.165055	0.754666	0.771868
ADARB1	XLOC_011777	0.613398	0.195301	0.24755
ADCK3	XLOC_019584	-0.810119	0.050659	0.107437
ADCK3	XLOC_011194	-0.793812	0.0593874	0.11716
ADCK3	XLOC_002110	-0.788068	0.0626133	0.120661
ADCK3	XLOC_005053	-0.749583	0.0862115	0.144933
ADCK3	XLOC_023658	-0.749446	0.0863013	0.145027
ADCK3	XLOC_026943	-0.693837	0.126255	0.183519
ADCK3	XLOC_005292	-0.472474	0.344024	0.384099
ADCK3	XLOC_015932	-0.391262	0.443055	0.476661
ADCK3	XLOC_011777	0.236023	0.652539	0.675049
ADCK3	XLOC_015754	0.660275	0.153515	0.209025
ADCK3	XLOC_009502	0.714774	0.110429	0.168564
ADCK3	XLOC_017606	0.858985	0.0284259	0.0797877
ADCK3	XLOC_003704	0.941403	0.0050498	0.0372139
ADGRA1	XLOC_011777	-0.57276	0.234808	0.283691
ADGRA1	XLOC_003704	-0.357931	0.486032	0.517116
ADGRA1	XLOC_017606	-0.241391	0.644947	0.667876
ADGRA1	XLOC_009502	-0.0636296	0.904684	0.912239
ADGRA1	XLOC_005292	-0.0464941	0.930309	0.935927
ADGRA1	XLOC_015754	0.0642595	0.903743	0.911369
ADGRA1	XLOC_015932	0.532354	0.276904	0.322142
ADGRA1	XLOC_026943	0.606574	0.201728	0.253467
ADGRA1	XLOC_005053	0.775771	0.0697808	0.128229
ADGRA1	XLOC_002110	0.785471	0.0640972	0.12222
ADGRA1	XLOC_019584	0.788657	0.0622791	0.120305
ADGRA1	XLOC_011194	0.862833	0.0269316	0.0776844
ADGRA1	XLOC_023658	0.894392	0.0161406	0.0608425
ADGRF1	XLOC_013668	-0.605167	0.203064	0.507105
ADGRF1	XLOC_020482	-0.437235	0.385941	0.708823
ADGRF1	XLOC_000504	0.0672556	0.899269	0.975193
ADGRF1	XLOC_013477	0.324997	0.529668	0.804821
ADGRF1	XLOC_012808	0.974352	0.000978268	0.0093176
ADGRF1	XLOC_019155	0.989031	0.000179834	0.00277726
ADGRF5	XLOC_011777	-0.692542	0.127263	0.184485
ADGRF5	XLOC_013668	-0.542678	0.265892	0.450139
ADGRF5	XLOC_003704	-0.457525	0.361599	0.400494
ADGRF5	XLOC_017606	-0.317365	0.539935	0.568108
ADGRF5	XLOC_009502	-0.0871792	0.869563	0.87959
ADGRF5	XLOC_003497	-0.039128	0.941338	0.964972
ADGRF5	XLOC_015754	0.0790323	0.881698	0.890891
ADGRF5	XLOC_019200	0.255759	0.624726	0.745513
ADGRF5	XLOC_026943	0.373693	0.465552	0.49781
ADGRF5	XLOC_005292	0.378774	0.459011	0.491658
ADGRF5	XLOC_015932	0.878191	0.0213523	0.0694201
ADGRF5	XLOC_019584	0.892654	0.0166661	0.0617418
ADGRF5	XLOC_011194	0.913505	0.0108986	0.0509667
ADGRF5	XLOC_023658	0.936076	0.0059988	0.0397513
ADGRF5	XLOC_005053	0.937016	0.00582557	0.0392957
ADGRF5	XLOC_002110	0.937215	0.00578927	0.0392134
ADGRF5	XLOC_012115	0.940907	0.00513474	0.021985
ADGRF5	XLOC_019411	0.989118	0.000176988	0.00162155
ADGRF5	XLOC_021768	0.990791	0.000126831	0.00125876
ADGRF5	XLOC_017447	0.992137	9.25014e-05	0.000992058
ADGRF5	XLOC_011737	0.998394	3.8651e-06	0.000105842
ADGRF5	XLOC_003635	0.999101	1.21312e-06	5.12944e-05
ADGRF5	XLOC_002731	0.999307	7.20752e-07	3.82567e-05
ADGRL2	XLOC_026943	-0.572763	0.234805	0.283688
ADGRL2	XLOC_019584	-0.559613	0.248206	0.295861
ADGRL2	XLOC_011194	-0.555262	0.252705	0.299983
ADGRL2	XLOC_002110	-0.525561	0.284242	0.32888
ADGRL2	XLOC_023658	-0.514409	0.296447	0.340102
ADGRL2	XLOC_013668	-0.513978	0.296923	0.62995
ADGRL2	XLOC_005053	-0.471284	0.345412	0.385398
ADGRL2	XLOC_020482	-0.427471	0.39785	0.717606
ADGRL2	XLOC_005292	-0.251016	0.631384	0.654989
ADGRL2	XLOC_015932	-0.197323	0.707858	0.727605
ADGRL2	XLOC_011777	-0.114009	0.829728	0.842381
ADGRL2	XLOC_000504	0.161645	0.759645	0.915679
ADGRL2	XLOC_013477	0.389458	0.445348	0.749874
ADGRL2	XLOC_015754	0.84951	0.0322669	0.084939
ADGRL2	XLOC_009502	0.892228	0.0167964	0.0619601
ADGRL2	XLOC_017606	0.956342	0.00281741	0.0299439
ADGRL2	XLOC_003704	0.977405	0.00076005	0.0199881
ADGRL2	XLOC_012808	0.985547	0.000311811	0.00403321
ADGRL2	XLOC_019155	0.990008	0.00014926	0.00243226
ADGRV1	XLOC_019584	-0.643819	0.167704	0.222136
ADGRV1	XLOC_002110	-0.604725	0.203484	0.255065
ADGRV1	XLOC_011194	-0.601599	0.206467	0.257792
ADGRV1	XLOC_026943	-0.584018	0.223571	0.273386
ADGRV1	XLOC_023658	-0.564968	0.242714	0.290845
ADGRV1	XLOC_005053	-0.554947	0.253032	0.300284
ADGRV1	XLOC_005292	-0.414476	0.413888	0.449365
ADGRV1	XLOC_015932	-0.254959	0.625848	0.649704
ADGRV1	XLOC_011777	-0.01844	0.972343	0.974631
ADGRV1	XLOC_015754	0.806242	0.0526761	0.109736
ADGRV1	XLOC_009502	0.877417	0.0216188	0.0698426
ADGRV1	XLOC_017606	0.964593	0.00185829	0.0260732
ADGRV1	XLOC_003704	0.993195	6.9312e-05	0.0118925
ADH5	XLOC_019584	-0.841564	0.0356646	0.089335
ADH5	XLOC_011194	-0.831387	0.0402484	0.0951389
ADH5	XLOC_002110	-0.816198	0.0475701	0.103859
ADH5	XLOC_026943	-0.796617	0.0578407	0.115466
ADH5	XLOC_005053	-0.784795	0.0644862	0.122624
ADH5	XLOC_023658	-0.769041	0.0738534	0.13245
ADH5	XLOC_005292	-0.51749	0.293056	0.336989
ADH5	XLOC_015932	-0.322766	0.532664	0.56124
ADH5	XLOC_011777	0.33921	0.5107	0.540431
ADH5	XLOC_015754	0.61402	0.194719	0.247016
ADH5	XLOC_009502	0.619246	0.18986	0.242563
ADH5	XLOC_017606	0.776095	0.0695878	0.128019
ADH5	XLOC_003704	0.882091	0.0200341	0.0673733
ADI1	XLOC_011194	-0.954435	0.00306694	0.0308922
ADI1	XLOC_002110	-0.93429	0.00633485	0.0406301
ADI1	XLOC_023658	-0.932069	0.00676515	0.0417202
ADI1	XLOC_019584	-0.917846	0.00984669	0.0487649
ADI1	XLOC_005053	-0.915459	0.0104187	0.0499987
ADI1	XLOC_015932	-0.647244	0.164707	0.219387
ADI1	XLOC_026943	-0.643827	0.167697	0.222128
ADI1	XLOC_005292	-0.373136	0.466272	0.498495
ADI1	XLOC_015754	0.290037	0.577144	0.603441
ADI1	XLOC_009502	0.368793	0.47189	0.503816
ADI1	XLOC_011777	0.537968	0.270895	0.316639
ADI1	XLOC_017606	0.573674	0.233888	0.282852
ADI1	XLOC_003704	0.710196	0.11381	0.171783
ADORA2A	XLOC_011777	-0.535418	0.273618	0.319124
ADORA2A	XLOC_003704	-0.492672	0.320784	0.36259
ADORA2A	XLOC_013668	-0.47868	0.336821	0.667621
ADORA2A	XLOC_017606	-0.370692	0.469431	0.501507
ADORA2A	XLOC_009502	-0.193776	0.712974	0.732455
ADORA2A	XLOC_015754	-0.108422	0.838005	0.850097
ADORA2A	XLOC_000504	-0.0381101	0.942863	0.986141
ADORA2A	XLOC_012808	0.0381605	0.942787	0.986141
ADORA2A	XLOC_005292	0.0514925	0.92283	0.929079
ADORA2A	XLOC_019155	0.0710684	0.893577	0.973055
ADORA2A	XLOC_020482	0.204945	0.696887	0.885822
ADORA2A	XLOC_013477	0.230655	0.660154	0.869679
ADORA2A	XLOC_015932	0.469785	0.347163	0.387028
ADORA2A	XLOC_026943	0.709772	0.114125	0.172079
ADORA2A	XLOC_005053	0.79992	0.0560433	0.113453
ADORA2A	XLOC_002110	0.815697	0.047821	0.104155
ADORA2A	XLOC_019584	0.825268	0.0431297	0.0986158
ADORA2A	XLOC_011194	0.893987	0.0162625	0.0610457
ADORA2A	XLOC_023658	0.898819	0.0148386	0.0585265
ADRBK2	XLOC_013668	-0.52078	0.289451	0.471878
ADRBK2	XLOC_003497	-0.0775655	0.883885	0.92861
ADRBK2	XLOC_019200	0.260735	0.617761	0.740749
ADRBK2	XLOC_012115	0.945727	0.00433838	0.0191978
ADRBK2	XLOC_021768	0.986108	0.000288125	0.00234662
ADRBK2	XLOC_019411	0.993896	5.57827e-05	0.000679151
ADRBK2	XLOC_017447	0.996084	2.29727e-05	0.000358211
ADRBK2	XLOC_003635	0.997357	1.04725e-05	0.00020649
ADRBK2	XLOC_011737	0.999573	2.7325e-07	2.3102e-05
ADRBK2	XLOC_002731	0.99986	2.9494e-08	9.16281e-06
ADSSL1	XLOC_011777	-0.743614	0.0901739	0.148889
ADSSL1	XLOC_003704	-0.131995	0.803158	0.817491
ADSSL1	XLOC_015932	-0.0819502	0.87735	0.886815
ADSSL1	XLOC_017606	0.0225615	0.966163	0.968952
ADSSL1	XLOC_015754	0.051143	0.923352	0.929554
ADSSL1	XLOC_009502	0.179329	0.73389	0.752222
ADSSL1	XLOC_005292	0.429902	0.394874	0.431558
ADSSL1	XLOC_023658	0.595972	0.211882	0.262697
ADSSL1	XLOC_002110	0.622568	0.186799	0.239786
ADSSL1	XLOC_005053	0.640608	0.170534	0.224734
ADSSL1	XLOC_011194	0.668347	0.146751	0.202712
ADSSL1	XLOC_019584	0.671762	0.143928	0.200102
ADSSL1	XLOC_026943	0.906772	0.0126321	0.0544128
AFAP1L2	XLOC_013668	-0.459515	0.359242	0.688032
AFAP1L2	XLOC_020482	0.159674	0.762524	0.91681
AFAP1L2	XLOC_000504	0.203956	0.698309	0.88646
AFAP1L2	XLOC_013477	0.499608	0.312941	0.645782
AFAP1L2	XLOC_012808	0.739167	0.0931781	0.303996
AFAP1L2	XLOC_019155	0.749151	0.0864957	0.288429
AGFG2	XLOC_011777	-0.55655	0.251371	0.298769
AGFG2	XLOC_013668	-0.547815	0.260478	0.588325
AGFG2	XLOC_003704	-0.445866	0.375519	0.413481
AGFG2	XLOC_000504	-0.362551	0.480001	0.773946
AGFG2	XLOC_017606	-0.321537	0.534316	0.562796
AGFG2	XLOC_012808	-0.251778	0.630313	0.858199
AGFG2	XLOC_019155	-0.197238	0.70798	0.891257
AGFG2	XLOC_009502	-0.130707	0.805056	0.819252
AGFG2	XLOC_013477	-0.12972	0.806511	0.935831
AGFG2	XLOC_015754	0.00323384	0.995149	0.995595
AGFG2	XLOC_005292	0.00562489	0.991563	0.992328
AGFG2	XLOC_020482	0.0419707	0.937081	0.984758
AGFG2	XLOC_026943	0.528276	0.2813	0.326193
AGFG2	XLOC_015932	0.678971	0.138047	0.194587
AGFG2	XLOC_019584	0.816159	0.0475896	0.103884
AGFG2	XLOC_005053	0.825592	0.0429745	0.0984361
AGFG2	XLOC_002110	0.837963	0.0372566	0.0913798
AGFG2	XLOC_011194	0.901609	0.0140448	0.0570422
AGFG2	XLOC_023658	0.927709	0.00765005	0.0438778
AGO2	XLOC_003704	-0.602797	0.205322	0.256759
AGO2	XLOC_011777	-0.515954	0.294745	0.338557
AGO2	XLOC_017606	-0.469825	0.347116	0.386984
AGO2	XLOC_015754	-0.294309	0.571283	0.597847
AGO2	XLOC_009502	-0.285002	0.584072	0.610032
AGO2	XLOC_026943	0.423001	0.403343	0.439483
AGO2	XLOC_015932	0.542879	0.26568	0.31183
AGO2	XLOC_023658	0.631895	0.178312	0.231917
AGO2	XLOC_011194	0.699473	0.121904	0.179435
AGO2	XLOC_019584	0.73668	0.0948772	0.153518
AGO2	XLOC_005053	0.770126	0.0731895	0.13175
AGO2	XLOC_002110	0.77166	0.0722563	0.130786
AGO2	XLOC_005292	0.788805	0.0621951	0.120211
AGPAT1	XLOC_019584	-0.720191	0.106486	0.164738
AGPAT1	XLOC_011194	-0.697973	0.123055	0.180544
AGPAT1	XLOC_002110	-0.694314	0.125884	0.183174
AGPAT1	XLOC_023658	-0.67933	0.137757	0.194322
AGPAT1	XLOC_005053	-0.646374	0.165467	0.220067
AGPAT1	XLOC_026943	-0.565479	0.242192	0.290355
AGPAT1	XLOC_015932	-0.405917	0.424566	0.459301
AGPAT1	XLOC_005292	-0.353404	0.491963	0.522738
AGPAT1	XLOC_011777	0.0670318	0.899603	0.907572
AGPAT1	XLOC_015754	0.709025	0.114682	0.172597
AGPAT1	XLOC_009502	0.820811	0.0452864	0.101192
AGPAT1	XLOC_017606	0.933649	0.00645756	0.0409285
AGPAT1	XLOC_003704	0.97628	0.00083727	0.0205668
AGR2	XLOC_019584	-0.700227	0.121326	0.178881
AGR2	XLOC_011194	-0.686439	0.132066	0.188994
AGR2	XLOC_023658	-0.670747	0.144765	0.200863
AGR2	XLOC_002110	-0.669532	0.145768	0.201791
AGR2	XLOC_005053	-0.619459	0.189664	0.242385
AGR2	XLOC_026943	-0.58142	0.226144	0.275753
AGR2	XLOC_015932	-0.370453	0.469741	0.501796
AGR2	XLOC_005292	-0.286665	0.581781	0.607877
AGR2	XLOC_011777	0.0370894	0.944391	0.948911
AGR2	XLOC_015754	0.716952	0.108836	0.167017
AGR2	XLOC_009502	0.828114	0.0417778	0.0970102
AGR2	XLOC_017606	0.932285	0.00672267	0.0416152
AGR2	XLOC_003704	0.969356	0.00139422	0.0238203
AGRN	XLOC_019584	-0.872886	0.02321	0.0722886
AGRN	XLOC_002110	-0.836933	0.037718	0.0919771
AGRN	XLOC_011194	-0.824854	0.0433278	0.0988608
AGRN	XLOC_023658	-0.821348	0.045024	0.10088
AGRN	XLOC_005053	-0.803421	0.0541666	0.111406
AGRN	XLOC_026943	-0.659485	0.154184	0.209665
AGRN	XLOC_003497	-0.555285	0.252681	0.437132
AGRN	XLOC_015932	-0.471177	0.345537	0.385516
AGRN	XLOC_005292	-0.463204	0.354886	0.394207
AGRN	XLOC_019200	-0.00633893	0.990492	0.994449
AGRN	XLOC_013668	0.180005	0.732909	0.824027
AGRN	XLOC_011777	0.333171	0.518735	0.548017
AGRN	XLOC_021768	0.472185	0.344362	0.52489
AGRN	XLOC_015754	0.476142	0.339761	0.380156
AGRN	XLOC_003635	0.514987	0.295809	0.477869
AGRN	XLOC_012115	0.533053	0.276152	0.45971
AGRN	XLOC_011737	0.555257	0.25271	0.437152
AGRN	XLOC_002731	0.563161	0.244562	0.428763
AGRN	XLOC_019411	0.604331	0.203859	0.383615
AGRN	XLOC_017447	0.609176	0.199267	0.378201
AGRN	XLOC_009502	0.621933	0.187383	0.240317
AGRN	XLOC_017606	0.782615	0.0657477	0.12397
AGRN	XLOC_003704	0.856345	0.0294728	0.0812088
AHNAK	XLOC_013668	-0.518857	0.291555	0.47374
AHNAK	XLOC_003497	-0.0708881	0.893846	0.935298
AHNAK	XLOC_019200	0.252046	0.629937	0.748959
AHNAK	XLOC_012115	0.941871	0.00497034	0.0214259
AHNAK	XLOC_021768	0.987738	0.000224607	0.00194613
AHNAK	XLOC_019411	0.992834	7.68353e-05	0.000861728
AHNAK	XLOC_017447	0.995177	3.48398e-05	0.000481169
AHNAK	XLOC_003635	0.997913	6.52633e-06	0.000149766
AHNAK	XLOC_002731	0.999567	2.80679e-07	2.33845e-05
AHNAK	XLOC_011737	0.999771	7.86141e-08	1.29683e-05
AIF1L	XLOC_013477	-0.895394	0.0158412	0.0801381
AIF1L	XLOC_000504	-0.868345	0.0248585	0.113704
AIF1L	XLOC_020482	-0.754807	0.0828087	0.279469
AIF1L	XLOC_013668	-0.438029	0.384979	0.708117
AIF1L	XLOC_012808	-0.0972802	0.85454	0.956591
AIF1L	XLOC_019155	-0.0364038	0.945418	0.986601
AIMP1	XLOC_019200	-0.504631	0.307307	0.489189
AIMP1	XLOC_003497	-0.00414857	0.993777	0.99636
AIMP1	XLOC_012115	0.100818	0.849285	0.905141
AIMP1	XLOC_013668	0.243864	0.641455	0.757034
AIMP1	XLOC_011737	0.253939	0.62728	0.747212
AIMP1	XLOC_003635	0.256591	0.62356	0.744809
AIMP1	XLOC_019411	0.257701	0.622005	0.743763
AIMP1	XLOC_021768	0.258657	0.620667	0.742768
AIMP1	XLOC_002731	0.274748	0.598247	0.727589
AIMP1	XLOC_017447	0.279441	0.591749	0.723083
AKAP2	XLOC_013668	-0.597503	0.210403	0.391497
AKAP2	XLOC_011777	-0.57384	0.233721	0.282691
AKAP2	XLOC_003704	-0.419104	0.408151	0.443969
AKAP2	XLOC_017606	-0.301451	0.56152	0.588593
AKAP2	XLOC_015754	-0.134081	0.800084	0.814564
AKAP2	XLOC_009502	-0.130209	0.80579	0.819932
AKAP2	XLOC_003497	0.0395943	0.94064	0.964554
AKAP2	XLOC_019200	0.264526	0.612466	0.737151
AKAP2	XLOC_026943	0.373566	0.465716	0.497962
AKAP2	XLOC_015932	0.393054	0.440781	0.474507
AKAP2	XLOC_023658	0.494678	0.318509	0.360497
AKAP2	XLOC_011194	0.55487	0.253112	0.300355
AKAP2	XLOC_019584	0.658324	0.15517	0.21057
AKAP2	XLOC_002110	0.669	0.14621	0.20219
AKAP2	XLOC_005053	0.681014	0.1364	0.193052
AKAP2	XLOC_012115	0.932027	0.00677355	0.027567
AKAP2	XLOC_005292	0.93467	0.00626268	0.040459
AKAP2	XLOC_019411	0.974726	0.00095011	0.00587064
AKAP2	XLOC_017447	0.978964	0.000659092	0.0044202
AKAP2	XLOC_011737	0.991563	0.000106475	0.0011013
AKAP2	XLOC_002731	0.993296	6.7256e-05	0.000779497
AKAP2	XLOC_021768	0.995818	2.62014e-05	0.000393052
AKAP2	XLOC_003635	0.998113	5.33892e-06	0.000130963
AKNA	XLOC_013668	-0.710435	0.113632	0.349767
AKNA	XLOC_000504	-0.105873	0.841784	0.951165
AKNA	XLOC_020482	-0.0502889	0.92463	0.982358
AKNA	XLOC_013477	0.234263	0.655034	0.868008
AKNA	XLOC_012808	0.390632	0.443856	0.748949
AKNA	XLOC_019155	0.432897	0.391217	0.712734
AKT1S1	XLOC_011194	-0.816144	0.0475969	0.103892
AKT1S1	XLOC_002110	-0.796405	0.057957	0.1156
AKT1S1	XLOC_023658	-0.794244	0.0591481	0.116904
AKT1S1	XLOC_019584	-0.782843	0.0656157	0.123834
AKT1S1	XLOC_005053	-0.759726	0.079662	0.138375
AKT1S1	XLOC_015932	-0.591886	0.215849	0.266342
AKT1S1	XLOC_026943	-0.532857	0.276364	0.321652
AKT1S1	XLOC_005292	-0.296515	0.568263	0.594987
AKT1S1	XLOC_011777	0.24272	0.64307	0.666068
AKT1S1	XLOC_015754	0.537148	0.27177	0.317435
AKT1S1	XLOC_009502	0.628202	0.181653	0.235016
AKT1S1	XLOC_017606	0.78186	0.0661874	0.124438
AKT1S1	XLOC_003704	0.870101	0.0242146	0.073733
ALAD	XLOC_019584	-0.957847	0.00262783	0.0292204
ALAD	XLOC_002110	-0.9486	0.00389499	0.0336887
ALAD	XLOC_005053	-0.92814	0.00756026	0.0436622
ALAD	XLOC_011194	-0.927743	0.00764305	0.0438606
ALAD	XLOC_023658	-0.913713	0.0108471	0.0508567
ALAD	XLOC_026943	-0.658634	0.154907	0.210325
ALAD	XLOC_015932	-0.60672	0.201589	0.253333
ALAD	XLOC_005292	-0.552427	0.255653	0.302658
ALAD	XLOC_015754	0.331891	0.520442	0.54962
ALAD	XLOC_009502	0.453802	0.366024	0.404651
ALAD	XLOC_011777	0.530487	0.278913	0.324002
ALAD	XLOC_017606	0.657515	0.155858	0.211208
ALAD	XLOC_003704	0.774691	0.0704275	0.128901
ALDH1A1	XLOC_000504	-0.888902	0.0178286	0.0876531
ALDH1A1	XLOC_013477	-0.871652	0.0236528	0.109365
ALDH1A1	XLOC_020482	-0.835351	0.0384323	0.159114
ALDH1A1	XLOC_013668	-0.553945	0.254073	0.579798
ALDH1A1	XLOC_012808	-0.106326	0.841112	0.9509
ALDH1A1	XLOC_019155	-0.0384515	0.942351	0.986069
ALDH1A3	XLOC_013668	-0.690883	0.128561	0.284931
ALDH1A3	XLOC_003497	0.118066	0.823723	0.887808
ALDH1A3	XLOC_019200	0.345703	0.502103	0.65982
ALDH1A3	XLOC_012115	0.934106	0.00637005	0.0262335
ALDH1A3	XLOC_019411	0.948718	0.00387733	0.0175283
ALDH1A3	XLOC_017447	0.953386	0.00320869	0.0150907
ALDH1A3	XLOC_011737	0.972762	0.00110276	0.00658884
ALDH1A3	XLOC_002731	0.975533	0.000890623	0.00558255
ALDH1A3	XLOC_003635	0.984784	0.000345516	0.00270014
ALDH1A3	XLOC_021768	0.987867	0.00021991	0.0019154
ALDH3A2	XLOC_011194	-0.762848	0.077693	0.136359
ALDH3A2	XLOC_023658	-0.742272	0.0910757	0.149755
ALDH3A2	XLOC_002110	-0.68086	0.136523	0.193169
ALDH3A2	XLOC_019584	-0.664185	0.150223	0.205953
ALDH3A2	XLOC_005053	-0.649211	0.162996	0.2178
ALDH3A2	XLOC_026943	-0.557787	0.250091	0.297583
ALDH3A2	XLOC_015932	-0.467142	0.350258	0.389904
ALDH3A2	XLOC_005292	0.00277543	0.995837	0.996221
ALDH3A2	XLOC_011777	0.238364	0.649226	0.671907
ALDH3A2	XLOC_015754	0.403048	0.428165	0.462678
ALDH3A2	XLOC_009502	0.442786	0.379227	0.416948
ALDH3A2	XLOC_017606	0.574116	0.233443	0.282447
ALDH3A2	XLOC_003704	0.668156	0.146909	0.202854
ALDOB,TMEM246	XLOC_017606	-0.303131	0.559231	0.586424
ALDOB,TMEM246	XLOC_003704	-0.253195	0.628323	0.652051
ALDOB,TMEM246	XLOC_009502	-0.252755	0.628941	0.652653
ALDOB,TMEM246	XLOC_026943	-0.24399	0.641277	0.664395
ALDOB,TMEM246	XLOC_011777	-0.000853342	0.99872	0.998823
ALDOB,TMEM246	XLOC_005292	0.0336744	0.949507	0.953621
ALDOB,TMEM246	XLOC_015754	0.0829689	0.875832	0.885409
ALDOB,TMEM246	XLOC_011194	0.190513	0.717688	0.736909
ALDOB,TMEM246	XLOC_005053	0.24815	0.635416	0.658834
ALDOB,TMEM246	XLOC_002110	0.265425	0.611213	0.635786
ALDOB,TMEM246	XLOC_019584	0.26874	0.606594	0.631413
ALDOB,TMEM246	XLOC_023658	0.30746	0.553342	0.580806
ALDOB,TMEM246	XLOC_015932	0.567484	0.240149	0.288506
ALDOC	XLOC_011194	-0.813664	0.0488465	0.105331
ALDOC	XLOC_002110	-0.78781	0.0627603	0.120816
ALDOC	XLOC_005053	-0.765969	0.0757466	0.134387
ALDOC	XLOC_019584	-0.764589	0.0766047	0.135245
ALDOC	XLOC_023658	-0.747818	0.0873747	0.146092
ALDOC	XLOC_026943	-0.625981	0.183674	0.236885
ALDOC	XLOC_015932	-0.472277	0.344254	0.384307
ALDOC	XLOC_005292	-0.406566	0.423753	0.458538
ALDOC	XLOC_011777	0.382619	0.454079	0.487
ALDOC	XLOC_009502	0.446321	0.374973	0.41297
ALDOC	XLOC_015754	0.471859	0.344741	0.384762
ALDOC	XLOC_017606	0.612447	0.196191	0.248372
ALDOC	XLOC_003704	0.741614	0.0915195	0.150201
ALG14	XLOC_011194	-0.860328	0.0279001	0.0790588
ALG14	XLOC_019584	-0.853634	0.0305666	0.0826854
ALG14	XLOC_002110	-0.842533	0.0352416	0.088807
ALG14	XLOC_005053	-0.818383	0.0464816	0.102578
ALG14	XLOC_026943	-0.794615	0.0589427	0.116688
ALG14	XLOC_023658	-0.789097	0.0620296	0.12003
ALG14	XLOC_005292	-0.532035	0.277247	0.322451
ALG14	XLOC_015932	-0.358139	0.485759	0.516863
ALG14	XLOC_011777	0.425073	0.400793	0.437075
ALG14	XLOC_009502	0.515034	0.295758	0.339474
ALG14	XLOC_015754	0.537369	0.271533	0.317219
ALG14	XLOC_017606	0.687045	0.131586	0.188557
ALG14	XLOC_003704	0.814657	0.0483448	0.104755
ALOX5	XLOC_013668	-0.540546	0.268152	0.452181
ALOX5	XLOC_003497	-0.0452503	0.932171	0.959591
ALOX5	XLOC_019200	0.25638	0.623856	0.744967
ALOX5	XLOC_012115	0.941416	0.00504765	0.0216849
ALOX5	XLOC_019411	0.989986	0.000149908	0.00143119
ALOX5	XLOC_021768	0.99001	0.000149192	0.00142571
ALOX5	XLOC_017447	0.992551	8.30349e-05	0.000914372
ALOX5	XLOC_011737	0.998631	2.81197e-06	8.66269e-05
ALOX5	XLOC_003635	0.998952	1.64676e-06	6.19296e-05
ALOX5	XLOC_002731	0.999159	1.06164e-06	4.73533e-05
ALS2CL	XLOC_011194	-0.953853	0.00314513	0.0311481
ALS2CL	XLOC_002110	-0.944261	0.00457361	0.0357973
ALS2CL	XLOC_005053	-0.94279	0.00481581	0.0365526
ALS2CL	XLOC_019584	-0.921101	0.00909208	0.0471142
ALS2CL	XLOC_023658	-0.905711	0.0129166	0.0549605
ALS2CL	XLOC_026943	-0.691221	0.128297	0.185459
ALS2CL	XLOC_015932	-0.581987	0.225581	0.275241
ALS2CL	XLOC_005292	-0.506859	0.304819	0.3478
ALS2CL	XLOC_015754	0.146579	0.781707	0.797307
ALS2CL	XLOC_009502	0.153153	0.772067	0.788262
ALS2CL	XLOC_017606	0.377873	0.460168	0.492745
ALS2CL	XLOC_003704	0.549727	0.258473	0.305241
ALS2CL	XLOC_011777	0.713947	0.111036	0.169149
AMOT	XLOC_020482	-0.888082	0.0180874	0.0886747
AMOT	XLOC_023658	-0.673682	0.142352	0.198631
AMOT	XLOC_011194	-0.671255	0.144346	0.200488
AMOT	XLOC_019584	-0.639315	0.171679	0.225784
AMOT	XLOC_002110	-0.621097	0.188152	0.241007
AMOT	XLOC_005053	-0.56901	0.238599	0.2871
AMOT	XLOC_013668	-0.566359	0.241295	0.562699
AMOT	XLOC_026943	-0.512786	0.298239	0.341737
AMOT	XLOC_000504	-0.483816	0.330902	0.66199
AMOT	XLOC_015932	-0.415856	0.412175	0.447777
AMOT	XLOC_013477	-0.399828	0.432217	0.741631
AMOT	XLOC_005292	-0.0562151	0.915766	0.922532
AMOT	XLOC_011777	-0.0112518	0.983123	0.98461
AMOT	XLOC_012808	0.519925	0.290386	0.623127
AMOT	XLOC_019155	0.559494	0.24833	0.572298
AMOT	XLOC_015754	0.648607	0.163521	0.218299
AMOT	XLOC_009502	0.776538	0.0693239	0.127726
AMOT	XLOC_017606	0.869359	0.0244859	0.0741307
AMOT	XLOC_003704	0.900095	0.0144731	0.0578408
AMOTL1	XLOC_019584	-0.714052	0.110959	0.169076
AMOTL1	XLOC_026943	-0.709613	0.114244	0.172192
AMOTL1	XLOC_011194	-0.668489	0.146633	0.202592
AMOTL1	XLOC_002110	-0.651293	0.161194	0.216145
AMOTL1	XLOC_023658	-0.649918	0.162384	0.217253
AMOTL1	XLOC_005053	-0.605782	0.20248	0.254145
AMOTL1	XLOC_005292	-0.341863	0.507182	0.537116
AMOTL1	XLOC_015932	-0.200862	0.702759	0.722762
AMOTL1	XLOC_011777	0.0974285	0.85432	0.865379
AMOTL1	XLOC_015754	0.672378	0.143421	0.199635
AMOTL1	XLOC_009502	0.768696	0.0740649	0.132667
AMOTL1	XLOC_017606	0.868653	0.0247451	0.074503
AMOTL1	XLOC_003704	0.904354	0.0132846	0.0556639
AMOTL2	XLOC_013668	-0.49196	0.321594	0.653505
AMOTL2	XLOC_020482	-0.395864	0.437221	0.744928
AMOTL2	XLOC_000504	0.14364	0.786022	0.927517
AMOTL2	XLOC_013477	0.361332	0.48159	0.775188
AMOTL2	XLOC_012808	0.990979	0.00012171	0.0021029
AMOTL2	XLOC_019155	0.995411	3.15365e-05	0.000779477
ANK3	XLOC_011194	-0.76793	0.0745352	0.133169
ANK3	XLOC_023658	-0.747502	0.0875835	0.146308
ANK3	XLOC_019584	-0.736619	0.0949189	0.153556
ANK3	XLOC_002110	-0.724118	0.103668	0.16201
ANK3	XLOC_005053	-0.679381	0.137716	0.194284
ANK3	XLOC_026943	-0.6149	0.193898	0.246273
ANK3	XLOC_020482	-0.546847	0.261495	0.589371
ANK3	XLOC_013668	-0.482535	0.332375	0.663199
ANK3	XLOC_015932	-0.435392	0.38818	0.425304
ANK3	XLOC_005292	-0.1982	0.706592	0.726403
ANK3	XLOC_000504	0.0602693	0.909706	0.978209
ANK3	XLOC_011777	0.136688	0.796245	0.810943
ANK3	XLOC_013477	0.238308	0.649304	0.865815
ANK3	XLOC_015754	0.626893	0.182843	0.236115
ANK3	XLOC_009502	0.712125	0.11238	0.170434
ANK3	XLOC_017606	0.83682	0.0377689	0.0920448
ANK3	XLOC_003704	0.902757	0.0137245	0.0564521
ANK3	XLOC_012808	0.941782	0.00498533	0.0321265
ANK3	XLOC_019155	0.948373	0.00392927	0.0266773
ANKRD6	XLOC_026943	-0.794161	0.0591939	0.116952
ANKRD6	XLOC_011194	-0.710704	0.113433	0.171442
ANKRD6	XLOC_019584	-0.696808	0.123952	0.181375
ANKRD6	XLOC_002110	-0.675412	0.140938	0.19728
ANKRD6	XLOC_005053	-0.644811	0.166834	0.22132
ANKRD6	XLOC_023658	-0.617918	0.19109	0.243671
ANKRD6	XLOC_005292	-0.464881	0.352912	0.392363
ANKRD6	XLOC_015932	-0.150858	0.77543	0.791423
ANKRD6	XLOC_011777	0.240935	0.645591	0.668489
ANKRD6	XLOC_009502	0.601154	0.206894	0.258179
ANKRD6	XLOC_015754	0.686288	0.132186	0.189107
ANKRD6	XLOC_017606	0.724499	0.103396	0.161744
ANKRD6	XLOC_003704	0.827687	0.0419795	0.0972531
ANLN	XLOC_003497	-0.396995	0.435792	0.607102
ANLN	XLOC_019200	-0.0508255	0.923827	0.954498
ANLN	XLOC_013668	-0.0172357	0.974149	0.984614
ANLN	XLOC_012115	0.671987	0.143743	0.30773
ANLN	XLOC_021768	0.74843	0.0869708	0.214061
ANLN	XLOC_003635	0.768828	0.0739837	0.189888
ANLN	XLOC_002731	0.776849	0.0691387	0.180583
ANLN	XLOC_011737	0.799017	0.056532	0.15513
ANLN	XLOC_017447	0.804186	0.0537604	0.149355
ANLN	XLOC_019411	0.810326	0.0505523	0.142584
ANP32B	XLOC_019200	-0.29952	0.564155	0.703463
ANP32B	XLOC_013668	-0.256818	0.623242	0.744563
ANP32B	XLOC_003497	0.393426	0.440308	0.610956
ANP32B	XLOC_012115	0.406981	0.423234	0.596457
ANP32B	XLOC_019411	0.572971	0.234595	0.418271
ANP32B	XLOC_017447	0.593497	0.214281	0.395771
ANP32B	XLOC_002731	0.636189	0.174461	0.348633
ANP32B	XLOC_011737	0.648754	0.163393	0.334551
ANP32B	XLOC_003635	0.672364	0.143433	0.307269
ANP32B	XLOC_021768	0.7295	0.0998588	0.237226
ANXA1	XLOC_013668	-0.707648	0.115711	0.264288
ANXA1	XLOC_011777	-0.670893	0.144644	0.200752
ANXA1	XLOC_003704	-0.615615	0.193231	0.245642
ANXA1	XLOC_017606	-0.455043	0.364547	0.403253
ANXA1	XLOC_009502	-0.23523	0.653663	0.676121
ANXA1	XLOC_015754	-0.227552	0.664564	0.686457
ANXA1	XLOC_019200	0.22783	0.664168	0.773723
ANXA1	XLOC_003497	0.312202	0.546912	0.69157
ANXA1	XLOC_015932	0.578895	0.228657	0.27803
ANXA1	XLOC_026943	0.623716	0.185745	0.238813
ANXA1	XLOC_005292	0.708205	0.115294	0.17318
ANXA1	XLOC_012115	0.829391	0.0411783	0.121299
ANXA1	XLOC_023658	0.831	0.040428	0.0953461
ANXA1	XLOC_019411	0.870108	0.0242123	0.0789805
ANXA1	XLOC_017447	0.879667	0.0208489	0.0698017
ANXA1	XLOC_011194	0.889392	0.0176747	0.0634538
ANXA1	XLOC_019584	0.902864	0.0136948	0.0563953
ANXA1	XLOC_002731	0.918915	0.0095955	0.0367023
ANXA1	XLOC_011737	0.919416	0.00947911	0.036338
ANXA1	XLOC_005053	0.92357	0.00853919	0.0458837
ANXA1	XLOC_002110	0.925107	0.00820345	0.0451363
ANXA1	XLOC_003635	0.943929	0.00462777	0.0202372
ANXA1	XLOC_021768	0.969239	0.0014048	0.00796108
ANXA4	XLOC_013668	-0.572705	0.234864	0.553231
ANXA4	XLOC_020482	-0.496222	0.316761	0.648977
ANXA4	XLOC_000504	0.0574957	0.913852	0.979511
ANXA4	XLOC_013477	0.288344	0.579471	0.833627
ANXA4	XLOC_012808	0.970606	0.00128329	0.0114725
ANXA4	XLOC_019155	0.983079	0.000427034	0.00503802
ANXA6	XLOC_013668	-0.446672	0.374551	0.700023
ANXA6	XLOC_012808	-0.155102	0.769212	0.920072
ANXA6	XLOC_019155	-0.119027	0.822303	0.942545
ANXA6	XLOC_000504	-0.108707	0.837582	0.949224
ANXA6	XLOC_013477	0.119105	0.822187	0.942545
ANXA6	XLOC_020482	0.1312	0.80433	0.934909
AOX1	XLOC_020482	-0.746665	0.0881383	0.292489
AOX1	XLOC_013668	-0.610111	0.198386	0.500007
AOX1	XLOC_000504	-0.440587	0.381883	0.705816
AOX1	XLOC_013477	-0.303407	0.558855	0.822568
AOX1	XLOC_012808	0.677399	0.13932	0.399978
AOX1	XLOC_019155	0.71721	0.108648	0.33874
AP1M2	XLOC_011194	-0.857148	0.0291525	0.0807643
AP1M2	XLOC_023658	-0.820122	0.0456242	0.101571
AP1M2	XLOC_002110	-0.81997	0.0456988	0.101663
AP1M2	XLOC_019584	-0.808925	0.0512767	0.108156
AP1M2	XLOC_013477	-0.799839	0.056087	0.210862
AP1M2	XLOC_005053	-0.78931	0.0619091	0.119905
AP1M2	XLOC_020482	-0.726354	0.102077	0.324447
AP1M2	XLOC_000504	-0.668173	0.146895	0.414535
AP1M2	XLOC_026943	-0.635511	0.175067	0.228927
AP1M2	XLOC_015932	-0.526943	0.282743	0.327489
AP1M2	XLOC_005292	-0.29698	0.567626	0.59438
AP1M2	XLOC_012808	-0.180395	0.732343	0.903078
AP1M2	XLOC_013668	-0.166032	0.75324	0.912891
AP1M2	XLOC_019155	-0.144354	0.784973	0.926951
AP1M2	XLOC_011777	0.335461	0.515683	0.545144
AP1M2	XLOC_015754	0.487848	0.326281	0.367682
AP1M2	XLOC_009502	0.532287	0.276976	0.322209
AP1M2	XLOC_017606	0.696598	0.124114	0.181517
AP1M2	XLOC_003704	0.807321	0.0521111	0.109097
AP1S1	XLOC_011194	-0.886741	0.0185151	0.0648809
AP1S1	XLOC_002110	-0.876956	0.0217784	0.0700825
AP1S1	XLOC_019584	-0.874866	0.022508	0.071207
AP1S1	XLOC_005053	-0.851434	0.0314681	0.083884
AP1S1	XLOC_023658	-0.834767	0.0386973	0.0932067
AP1S1	XLOC_026943	-0.703593	0.118765	0.176464
AP1S1	XLOC_015932	-0.497538	0.315274	0.35753
AP1S1	XLOC_005292	-0.496171	0.316819	0.35894
AP1S1	XLOC_011777	0.424402	0.401618	0.437836
AP1S1	XLOC_015754	0.495814	0.317223	0.359317
AP1S1	XLOC_009502	0.523101	0.286918	0.331339
AP1S1	XLOC_017606	0.704521	0.118063	0.175808
AP1S1	XLOC_003704	0.828442	0.0416238	0.0968241
APCDD1	XLOC_019584	-0.82639	0.0425941	0.0979571
APCDD1	XLOC_011194	-0.82513	0.0431956	0.0986941
APCDD1	XLOC_002110	-0.823973	0.0437512	0.0993855
APCDD1	XLOC_023658	-0.798943	0.0565719	0.114041
APCDD1	XLOC_005053	-0.787122	0.0631521	0.121213
APCDD1	XLOC_026943	-0.591396	0.216326	0.26676
APCDD1	XLOC_015932	-0.546186	0.26219	0.308667
APCDD1	XLOC_005292	-0.420181	0.40682	0.442736
APCDD1	XLOC_011777	0.264707	0.612214	0.636743
APCDD1	XLOC_015754	0.575963	0.231589	0.280736
APCDD1	XLOC_009502	0.671657	0.144015	0.200175
APCDD1	XLOC_017606	0.829475	0.0411388	0.0962473
APCDD1	XLOC_003704	0.915387	0.0104362	0.0500437
APOE	XLOC_013668	-0.605025	0.203199	0.382873
APOE	XLOC_011777	-0.585494	0.222114	0.27206
APOE	XLOC_003704	-0.572354	0.235218	0.284062
APOE	XLOC_017606	-0.427355	0.397992	0.434476
APOE	XLOC_009502	-0.240202	0.646626	0.669467
APOE	XLOC_015754	-0.237764	0.650074	0.67271
APOE	XLOC_003497	0.122663	0.816929	0.88324
APOE	XLOC_019200	0.21917	0.676508	0.783079
APOE	XLOC_005292	0.280079	0.590867	0.616503
APOE	XLOC_015932	0.367934	0.473004	0.504871
APOE	XLOC_026943	0.840052	0.0363289	0.0901856
APOE	XLOC_005053	0.844059	0.0345803	0.0879421
APOE	XLOC_002110	0.857223	0.0291227	0.0807328
APOE	XLOC_019584	0.871336	0.0237665	0.0730925
APOE	XLOC_023658	0.880362	0.0206138	0.0682972
APOE	XLOC_012115	0.891311	0.017078	0.059098
APOE	XLOC_011194	0.920397	0.0092528	0.0474861
APOE	XLOC_019411	0.946809	0.00416867	0.0185771
APOE	XLOC_017447	0.952974	0.00326519	0.0152984
APOE	XLOC_002731	0.975265	0.000910184	0.00567696
APOE	XLOC_011737	0.977532	0.00075157	0.00489604
APOE	XLOC_003635	0.988528	0.000196666	0.00175954
APOE	XLOC_021768	0.998126	5.26283e-06	0.000129641
APRT,GALNS	XLOC_003497	-0.875147	0.0224093	0.0740464
APRT,GALNS	XLOC_005053	-0.836207	0.0380449	0.0923917
APRT,GALNS	XLOC_015932	-0.829172	0.0412807	0.0964132
APRT,GALNS	XLOC_002110	-0.811829	0.0497812	0.106424
APRT,GALNS	XLOC_023658	-0.80397	0.0538754	0.111077
APRT,GALNS	XLOC_011194	-0.787816	0.0627564	0.120811
APRT,GALNS	XLOC_019584	-0.741854	0.091358	0.150042
APRT,GALNS	XLOC_015754	-0.398495	0.433897	0.468044
APRT,GALNS	XLOC_021768	-0.342203	0.506732	0.66317
APRT,GALNS	XLOC_005292	-0.327652	0.52611	0.555028
APRT,GALNS	XLOC_009502	-0.296789	0.567887	0.594629
APRT,GALNS	XLOC_003635	-0.265943	0.610491	0.735776
APRT,GALNS	XLOC_026943	-0.236081	0.652458	0.674971
APRT,GALNS	XLOC_002731	-0.2174	0.679037	0.785029
APRT,GALNS	XLOC_011737	-0.203172	0.699436	0.799993
APRT,GALNS	XLOC_017447	-0.13543	0.798097	0.870314
APRT,GALNS	XLOC_019411	-0.108562	0.837797	0.897208
APRT,GALNS	XLOC_012115	-0.10696	0.840172	0.898737
APRT,GALNS	XLOC_017606	-0.0684978	0.897414	0.905538
APRT,GALNS	XLOC_019200	0.0257129	0.961439	0.97696
APRT,GALNS	XLOC_003704	0.0950241	0.857893	0.868692
APRT,GALNS	XLOC_013668	0.594251	0.213549	0.394965
APRT,GALNS	XLOC_011777	0.829897	0.0409418	0.0960041
AQP3	XLOC_019584	-0.69298	0.126922	0.18416
AQP3	XLOC_011194	-0.680019	0.137201	0.193788
AQP3	XLOC_023658	-0.66728	0.147638	0.203548
AQP3	XLOC_002110	-0.666183	0.148552	0.204384
AQP3	XLOC_005053	-0.615756	0.193099	0.245529
AQP3	XLOC_026943	-0.550531	0.257633	0.304465
AQP3	XLOC_021768	-0.482316	0.332626	0.513725
AQP3	XLOC_003635	-0.45352	0.366361	0.545674
AQP3	XLOC_011737	-0.436373	0.386988	0.564632
AQP3	XLOC_002731	-0.409104	0.420579	0.594285
AQP3	XLOC_015932	-0.396322	0.436642	0.470624
AQP3	XLOC_019411	-0.386877	0.448637	0.617822
AQP3	XLOC_017447	-0.379179	0.45849	0.625409
AQP3	XLOC_012115	-0.332807	0.51922	0.672403
AQP3	XLOC_005292	-0.281276	0.589213	0.614916
AQP3	XLOC_003497	-0.251468	0.630749	0.749557
AQP3	XLOC_019200	-0.0666957	0.900105	0.939549
AQP3	XLOC_011777	0.0259838	0.961033	0.964224
AQP3	XLOC_013668	0.399285	0.432901	0.604602
AQP3	XLOC_015754	0.714056	0.110956	0.169074
AQP3	XLOC_009502	0.833028	0.0394919	0.0942073
AQP3	XLOC_017606	0.936707	0.00588226	0.0394545
AQP3	XLOC_003704	0.971533	0.001204	0.0228116
AREG	XLOC_013668	-0.466961	0.35047	0.530725
AREG	XLOC_003497	-0.170499	0.746729	0.834306
AREG	XLOC_019200	0.27306	0.60059	0.729093
AREG	XLOC_012115	0.952664	0.00330803	0.015463
AREG	XLOC_021768	0.967589	0.00155873	0.0086196
AREG	XLOC_003635	0.98652	0.000271322	0.00224202
AREG	XLOC_002731	0.994915	3.87222e-05	0.00051929
AREG	XLOC_011737	0.995609	2.88755e-05	0.000420676
AREG	XLOC_019411	0.999418	5.08412e-07	3.16848e-05
AREG	XLOC_017447	0.999519	3.46695e-07	2.60096e-05
ARFGEF3	XLOC_013668	-0.501268	0.311075	0.643863
ARFGEF3	XLOC_020482	-0.409205	0.420453	0.733373
ARFGEF3	XLOC_000504	0.135148	0.798513	0.932418
ARFGEF3	XLOC_013477	0.355109	0.489726	0.780821
ARFGEF3	XLOC_012808	0.989432	0.000166933	0.00264241
ARFGEF3	XLOC_019155	0.994648	4.289e-05	0.000967635
ARHGAP15	XLOC_003704	-0.639194	0.171786	0.225883
ARHGAP15	XLOC_011777	-0.545063	0.263373	0.309706
ARHGAP15	XLOC_017606	-0.515142	0.295639	0.339365
ARHGAP15	XLOC_009502	-0.311828	0.547419	0.575197
ARHGAP15	XLOC_015754	-0.218364	0.67766	0.698902
ARHGAP15	XLOC_026943	0.389651	0.445103	0.478579
ARHGAP15	XLOC_005292	0.689717	0.129477	0.186566
ARHGAP15	XLOC_015932	0.714172	0.110871	0.168992
ARHGAP15	XLOC_023658	0.768165	0.0743907	0.133014
ARHGAP15	XLOC_011194	0.793819	0.0593836	0.117156
ARHGAP15	XLOC_019584	0.830805	0.0405187	0.095467
ARHGAP15	XLOC_005053	0.857675	0.0289431	0.0804891
ARHGAP15	XLOC_002110	0.864113	0.0264435	0.0769831
ARHGAP21	XLOC_013668	-0.471753	0.344865	0.674978
ARHGAP21	XLOC_020482	-0.317114	0.540273	0.811159
ARHGAP21	XLOC_000504	0.207523	0.693184	0.884029
ARHGAP21	XLOC_013477	0.436944	0.386294	0.709059
ARHGAP21	XLOC_012808	0.997961	6.23253e-06	0.000243932
ARHGAP21	XLOC_019155	0.998943	1.67469e-06	9.56853e-05
ARHGAP24	XLOC_011777	-0.666296	0.148457	0.204302
ARHGAP24	XLOC_003704	-0.520371	0.289898	0.33408
ARHGAP24	XLOC_017606	-0.388832	0.446146	0.479568
ARHGAP24	XLOC_009502	-0.161732	0.759518	0.776456
ARHGAP24	XLOC_015754	0.0218785	0.967187	0.969886
ARHGAP24	XLOC_005292	0.372679	0.466862	0.499063
ARHGAP24	XLOC_026943	0.437062	0.386152	0.423424
ARHGAP24	XLOC_015932	0.844511	0.0343858	0.0876823
ARHGAP24	XLOC_019584	0.926144	0.0079807	0.0446337
ARHGAP24	XLOC_011194	0.936291	0.00595887	0.0396523
ARHGAP24	XLOC_005053	0.949647	0.00373924	0.0331769
ARHGAP24	XLOC_002110	0.955242	0.00296007	0.0304873
ARHGAP24	XLOC_023658	0.963583	0.00196516	0.0265723
ARHGAP32	XLOC_013668	-0.435032	0.388618	0.710691
ARHGAP32	XLOC_020482	-0.322758	0.532674	0.806431
ARHGAP32	XLOC_000504	0.223712	0.67003	0.87293
ARHGAP32	XLOC_013477	0.436548	0.386775	0.709341
ARHGAP32	XLOC_019155	0.996453	1.88523e-05	0.000534268
ARHGAP32	XLOC_012808	0.998589	2.98496e-06	0.000145999
ARHGAP5	XLOC_013668	-0.487225	0.326994	0.658286
ARHGAP5	XLOC_020482	-0.345305	0.502628	0.78888
ARHGAP5	XLOC_000504	0.187055	0.722691	0.898143
ARHGAP5	XLOC_013477	0.416822	0.410977	0.726806
ARHGAP5	XLOC_012808	0.996265	2.0899e-05	0.000578062
ARHGAP5	XLOC_019155	0.998848	1.98848e-06	0.000107943
ARHGAP9	XLOC_013668	-0.204241	0.697898	0.8863
ARHGAP9	XLOC_012808	-0.0674679	0.898952	0.97512
ARHGAP9	XLOC_019155	-0.0458631	0.931254	0.983832
ARHGAP9	XLOC_000504	-0.0264393	0.96035	0.990072
ARHGAP9	XLOC_013477	0.160012	0.762031	0.916755
ARHGAP9	XLOC_020482	0.550219	0.257959	0.585052
ARHGDIB	XLOC_013668	-0.601431	0.206628	0.512563
ARHGDIB	XLOC_000504	-0.162195	0.75884	0.915249
ARHGDIB	XLOC_020482	0.00570472	0.991443	0.998057
ARHGDIB	XLOC_012808	0.0102304	0.984655	0.996231
ARHGDIB	XLOC_019155	0.0543695	0.918526	0.980782
ARHGDIB	XLOC_013477	0.120358	0.820335	0.942033
ARHGEF12	XLOC_011194	-0.663736	0.150599	0.206303
ARHGEF12	XLOC_023658	-0.649149	0.16305	0.217854
ARHGEF12	XLOC_019584	-0.645766	0.165998	0.22056
ARHGEF12	XLOC_002110	-0.615073	0.193736	0.246116
ARHGEF12	XLOC_026943	-0.596	0.211854	0.262671
ARHGEF12	XLOC_005053	-0.562982	0.244745	0.292713
ARHGEF12	XLOC_013668	-0.498645	0.314026	0.646716
ARHGEF12	XLOC_020482	-0.433471	0.390518	0.712148
ARHGEF12	XLOC_015932	-0.315445	0.542527	0.570594
ARHGEF12	XLOC_005292	-0.132498	0.802416	0.816789
ARHGEF12	XLOC_011777	-0.00850648	0.987241	0.988354
ARHGEF12	XLOC_000504	0.136644	0.796309	0.931486
ARHGEF12	XLOC_013477	0.351935	0.493892	0.783266
ARHGEF12	XLOC_015754	0.710295	0.113736	0.171713
ARHGEF12	XLOC_009502	0.803587	0.0540784	0.111304
ARHGEF12	XLOC_017606	0.892616	0.0166779	0.0617597
ARHGEF12	XLOC_003704	0.926235	0.00796115	0.0445913
ARHGEF12	XLOC_012808	0.985326	0.000321424	0.00412251
ARHGEF12	XLOC_019155	0.990033	0.000148525	0.00242275
ARHGEF16	XLOC_011194	-0.935127	0.00617618	0.0402318
ARHGEF16	XLOC_002110	-0.930717	0.00703394	0.042373
ARHGEF16	XLOC_005053	-0.929455	0.00728945	0.0429842
ARHGEF16	XLOC_019584	-0.904979	0.0131144	0.0553412
ARHGEF16	XLOC_023658	-0.880297	0.0206356	0.068332
ARHGEF16	XLOC_013477	-0.693956	0.126162	0.37473
ARHGEF16	XLOC_026943	-0.678548	0.138389	0.19491
ARHGEF16	XLOC_015932	-0.571127	0.236456	0.285181
ARHGEF16	XLOC_005292	-0.53797	0.270892	0.316637
ARHGEF16	XLOC_000504	-0.418159	0.409321	0.725609
ARHGEF16	XLOC_012808	-0.38999	0.444672	0.749417
ARHGEF16	XLOC_019155	-0.386284	0.449394	0.752752
ARHGEF16	XLOC_020482	-0.325369	0.529169	0.804595
ARHGEF16	XLOC_009502	0.164582	0.755355	0.772517
ARHGEF16	XLOC_015754	0.170809	0.746278	0.763947
ARHGEF16	XLOC_013668	0.301619	0.561291	0.824017
ARHGEF16	XLOC_017606	0.386402	0.449243	0.482472
ARHGEF16	XLOC_003704	0.558197	0.249667	0.297193
ARHGEF16	XLOC_011777	0.699398	0.121961	0.17949
ARHGEF17	XLOC_011194	-0.70242	0.119655	0.177314
ARHGEF17	XLOC_019584	-0.697498	0.123421	0.180891
ARHGEF17	XLOC_002110	-0.682522	0.135189	0.191929
ARHGEF17	XLOC_023658	-0.648336	0.163757	0.218515
ARHGEF17	XLOC_005053	-0.638872	0.172072	0.226152
ARHGEF17	XLOC_026943	-0.634583	0.175897	0.229692
ARHGEF17	XLOC_005292	-0.383057	0.453517	0.486473
ARHGEF17	XLOC_015932	-0.329147	0.524109	0.553137
ARHGEF17	XLOC_011777	0.0991456	0.851769	0.862992
ARHGEF17	XLOC_015754	0.749658	0.0861621	0.144882
ARHGEF17	XLOC_009502	0.772382	0.0718183	0.130344
ARHGEF17	XLOC_017606	0.886738	0.0185159	0.0648816
ARHGEF17	XLOC_003704	0.954124	0.00310861	0.0310206
ARHGEF28	XLOC_013668	-0.432357	0.391875	0.713078
ARHGEF28	XLOC_020482	-0.286664	0.581782	0.834868
ARHGEF28	XLOC_000504	0.238045	0.649677	0.865937
ARHGEF28	XLOC_013477	0.456665	0.36262	0.690692
ARHGEF28	XLOC_019155	0.997218	1.1597e-05	0.00037597
ARHGEF28	XLOC_012808	0.999738	1.02604e-07	1.89932e-05
ARHGEF3	XLOC_011777	-0.636124	0.174519	0.228422
ARHGEF3	XLOC_003704	-0.615149	0.193665	0.246048
ARHGEF3	XLOC_017606	-0.469725	0.347233	0.387094
ARHGEF3	XLOC_009502	-0.249108	0.634068	0.657557
ARHGEF3	XLOC_015754	-0.174291	0.741211	0.75917
ARHGEF3	XLOC_026943	0.488792	0.325202	0.366688
ARHGEF3	XLOC_005292	0.653614	0.159194	0.214325
ARHGEF3	XLOC_015932	0.714634	0.110531	0.168658
ARHGEF3	XLOC_023658	0.846999	0.0333231	0.0863459
ARHGEF3	XLOC_011194	0.87762	0.0215488	0.0697339
ARHGEF3	XLOC_019584	0.893486	0.0164135	0.0613041
ARHGEF3	XLOC_005053	0.922812	0.00870697	0.0462606
ARHGEF3	XLOC_002110	0.926473	0.00791066	0.0444743
ARHGEF40	XLOC_013668	-0.527085	0.282589	0.465585
ARHGEF40	XLOC_003497	-0.0755289	0.886922	0.930618
ARHGEF40	XLOC_019200	0.267993	0.607634	0.73379
ARHGEF40	XLOC_012115	0.947812	0.00401434	0.0180279
ARHGEF40	XLOC_021768	0.986184	0.000285013	0.00232698
ARHGEF40	XLOC_019411	0.993791	5.77003e-05	0.000695939
ARHGEF40	XLOC_017447	0.995874	2.55013e-05	0.000385584
ARHGEF40	XLOC_003635	0.997478	9.5307e-06	0.00019369
ARHGEF40	XLOC_011737	0.999516	3.51422e-07	2.61307e-05
ARHGEF40	XLOC_002731	0.999885	1.97269e-08	8.06416e-06
ARHGEF5	XLOC_011194	-0.857056	0.0291889	0.0808133
ARHGEF5	XLOC_002110	-0.821954	0.0447284	0.100558
ARHGEF5	XLOC_023658	-0.808934	0.051272	0.108149
ARHGEF5	XLOC_019584	-0.80496	0.0533513	0.110474
ARHGEF5	XLOC_005053	-0.796219	0.0580589	0.115713
ARHGEF5	XLOC_026943	-0.643089	0.168345	0.222725
ARHGEF5	XLOC_015932	-0.514819	0.295995	0.339688
ARHGEF5	XLOC_020482	-0.505864	0.305929	0.639069
ARHGEF5	XLOC_013668	-0.374283	0.464792	0.763595
ARHGEF5	XLOC_005292	-0.336404	0.514428	0.543963
ARHGEF5	XLOC_000504	0.109832	0.835915	0.948447
ARHGEF5	XLOC_013477	0.243627	0.64179	0.863009
ARHGEF5	XLOC_011777	0.381415	0.455621	0.48847
ARHGEF5	XLOC_015754	0.457834	0.361233	0.400155
ARHGEF5	XLOC_009502	0.473445	0.342893	0.383042
ARHGEF5	XLOC_017606	0.643579	0.167914	0.222333
ARHGEF5	XLOC_003704	0.766721	0.075281	0.1339
ARHGEF5	XLOC_019155	0.925716	0.00807214	0.0471802
ARHGEF5	XLOC_012808	0.927229	0.00775072	0.0456416
ARHGEF6	XLOC_003704	-0.663613	0.150702	0.206401
ARHGEF6	XLOC_011777	-0.622995	0.186407	0.23942
ARHGEF6	XLOC_017606	-0.518276	0.292193	0.336195
ARHGEF6	XLOC_009502	-0.302914	0.559526	0.586709
ARHGEF6	XLOC_015754	-0.257305	0.62256	0.6466
ARHGEF6	XLOC_026943	0.576177	0.231374	0.280535
ARHGEF6	XLOC_015932	0.616049	0.192826	0.245259
ARHGEF6	XLOC_005292	0.724748	0.103219	0.161576
ARHGEF6	XLOC_023658	0.827218	0.0422011	0.0975107
ARHGEF6	XLOC_011194	0.87355	0.0229735	0.0719184
ARHGEF6	XLOC_019584	0.904307	0.0132976	0.0556899
ARHGEF6	XLOC_005053	0.917555	0.0099156	0.0489189
ARHGEF6	XLOC_002110	0.92312	0.00863864	0.0461062
ARHGEF7	XLOC_013668	-0.644183	0.167384	0.450318
ARHGEF7	XLOC_000504	-0.04964	0.925601	0.98262
ARHGEF7	XLOC_020482	0.0686931	0.897122	0.974491
ARHGEF7	XLOC_013477	0.287174	0.58108	0.834481
ARHGEF7	XLOC_012808	0.511971	0.299141	0.63191
ARHGEF7	XLOC_019155	0.547335	0.260982	0.588801
ARL15	XLOC_013668	-0.551724	0.256386	0.583004
ARL15	XLOC_020482	-0.47914	0.33629	0.667135
ARL15	XLOC_000504	0.0265634	0.960164	0.989976
ARL15	XLOC_013477	0.243213	0.642374	0.863212
ARL15	XLOC_012808	0.966897	0.00162558	0.0138354
ARL15	XLOC_019155	0.97999	0.000596584	0.00644921
ARL4A	XLOC_011194	-0.860346	0.027893	0.0790483
ARL4A	XLOC_023658	-0.809554	0.0509506	0.107775
ARL4A	XLOC_002110	-0.807714	0.051906	0.108876
ARL4A	XLOC_019584	-0.794497	0.0590078	0.116753
ARL4A	XLOC_005053	-0.785189	0.0642596	0.122385
ARL4A	XLOC_026943	-0.690994	0.128474	0.185628
ARL4A	XLOC_015932	-0.459053	0.359789	0.3988
ARL4A	XLOC_005292	-0.279265	0.591993	0.617553
ARL4A	XLOC_009502	0.400822	0.430964	0.465315
ARL4A	XLOC_015754	0.406472	0.42387	0.458649
ARL4A	XLOC_011777	0.417148	0.410573	0.446257
ARL4A	XLOC_017606	0.570086	0.237509	0.286129
ARL4A	XLOC_003704	0.700601	0.121041	0.178611
ARL4D	XLOC_023658	-0.95273	0.00329884	0.0316696
ARL4D	XLOC_011194	-0.938295	0.00559375	0.0386815
ARL4D	XLOC_019584	-0.928093	0.0075701	0.0436829
ARL4D	XLOC_002110	-0.918084	0.00979043	0.0486396
ARL4D	XLOC_005053	-0.892761	0.0166337	0.0616873
ARL4D	XLOC_026943	-0.640192	0.170902	0.225085
ARL4D	XLOC_015932	-0.633449	0.176915	0.230638
ARL4D	XLOC_005292	-0.285339	0.583607	0.609593
ARL4D	XLOC_015754	0.263379	0.614067	0.638497
ARL4D	XLOC_009502	0.425477	0.400297	0.436618
ARL4D	XLOC_011777	0.483252	0.331549	0.372553
ARL4D	XLOC_017606	0.617801	0.191199	0.243769
ARL4D	XLOC_003704	0.722726	0.104663	0.162975
ARL5B	XLOC_013668	-0.607946	0.200429	0.379615
ARL5B	XLOC_003497	0.0158745	0.97619	0.985797
ARL5B	XLOC_019200	0.304199	0.557777	0.699067
ARL5B	XLOC_012115	0.946987	0.00414114	0.0184788
ARL5B	XLOC_019411	0.978874	0.000664757	0.00444951
ARL5B	XLOC_017447	0.982133	0.000476005	0.00344599
ARL5B	XLOC_021768	0.992809	7.73869e-05	0.000866299
ARL5B	XLOC_011737	0.992926	7.4887e-05	0.000845591
ARL5B	XLOC_002731	0.994676	4.24397e-05	0.000554788
ARL5B	XLOC_003635	0.997703	7.9078e-06	0.000170618
ARMC9	XLOC_023658	-0.906255	0.0127703	0.0546782
ARMC9	XLOC_011194	-0.869283	0.0245138	0.0741734
ARMC9	XLOC_002110	-0.813134	0.0491159	0.105637
ARMC9	XLOC_019584	-0.806393	0.052597	0.109648
ARMC9	XLOC_005053	-0.785135	0.0642906	0.122419
ARMC9	XLOC_015932	-0.671491	0.144151	0.200302
ARMC9	XLOC_026943	-0.508976	0.302463	0.345606
ARMC9	XLOC_005292	0.00273755	0.995894	0.996265
ARMC9	XLOC_015754	0.186694	0.723213	0.742135
ARMC9	XLOC_009502	0.367674	0.473341	0.505195
ARMC9	XLOC_011777	0.381634	0.45534	0.488198
ARMC9	XLOC_017606	0.535253	0.273795	0.319281
ARMC9	XLOC_003704	0.62385	0.185623	0.238706
ARNT,CTSK,CTSS	XLOC_013668	-0.756308	0.0818428	0.204601
ARNT,CTSK,CTSS	XLOC_011777	-0.731948	0.0981481	0.156699
ARNT,CTSK,CTSS	XLOC_003704	-0.547633	0.260669	0.307269
ARNT,CTSK,CTSS	XLOC_017606	-0.386366	0.44929	0.482512
ARNT,CTSK,CTSS	XLOC_009502	-0.154146	0.770613	0.786889
ARNT,CTSK,CTSS	XLOC_015754	-0.100808	0.8493	0.860694
ARNT,CTSK,CTSS	XLOC_019200	0.125247	0.813112	0.880646
ARNT,CTSK,CTSS	XLOC_026943	0.560599	0.247192	0.294938
ARNT,CTSK,CTSS	XLOC_003497	0.592635	0.215119	0.396651
ARNT,CTSK,CTSS	XLOC_012115	0.636802	0.173914	0.347925
ARNT,CTSK,CTSS	XLOC_015932	0.670672	0.144826	0.20092
ARNT,CTSK,CTSS	XLOC_019411	0.679329	0.137757	0.298907
ARNT,CTSK,CTSS	XLOC_005292	0.681969	0.135632	0.192343
ARNT,CTSK,CTSS	XLOC_017447	0.694902	0.125428	0.280097
ARNT,CTSK,CTSS	XLOC_011737	0.755209	0.0825497	0.205946
ARNT,CTSK,CTSS	XLOC_002731	0.757374	0.0811599	0.203378
ARNT,CTSK,CTSS	XLOC_003635	0.799801	0.0561076	0.15424
ARNT,CTSK,CTSS	XLOC_021768	0.849651	0.0322081	0.0996591
ARNT,CTSK,CTSS	XLOC_023658	0.870936	0.0239113	0.0733011
ARNT,CTSK,CTSS	XLOC_011194	0.907487	0.0124421	0.054062
ARNT,CTSK,CTSS	XLOC_019584	0.924543	0.00832573	0.045418
ARNT,CTSK,CTSS	XLOC_002110	0.951815	0.00342677	0.0321309
ARNT,CTSK,CTSS	XLOC_005053	0.954698	0.00303197	0.0307631
ARPC2	XLOC_011777	-0.708303	0.115221	0.173109
ARPC2	XLOC_003704	-0.607592	0.200764	0.252568
ARPC2	XLOC_017606	-0.447161	0.373964	0.412033
ARPC2	XLOC_009502	-0.220745	0.674261	0.695647
ARPC2	XLOC_015754	-0.192768	0.714429	0.733834
ARPC2	XLOC_015932	0.581169	0.226393	0.275972
ARPC2	XLOC_026943	0.652903	0.159806	0.214882
ARPC2	XLOC_005292	0.720846	0.106013	0.164283
ARPC2	XLOC_023658	0.863821	0.0265543	0.0771338
ARPC2	XLOC_011194	0.913977	0.0107815	0.0507375
ARPC2	XLOC_019584	0.938956	0.00547577	0.0383386
ARPC2	XLOC_005053	0.951946	0.00340823	0.032054
ARPC2	XLOC_002110	0.952616	0.00331467	0.03173
ARSB	XLOC_003704	-0.617459	0.191516	0.244069
ARSB	XLOC_011777	-0.598245	0.209688	0.260725
ARSB	XLOC_013668	-0.575334	0.23222	0.415735
ARSB	XLOC_017606	-0.480802	0.33437	0.375169
ARSB	XLOC_009502	-0.274703	0.598311	0.623539
ARSB	XLOC_015754	-0.229672	0.661549	0.683623
ARSB	XLOC_003497	0.0310134	0.953495	0.972201
ARSB	XLOC_019200	0.242575	0.643274	0.758339
ARSB	XLOC_026943	0.479265	0.336144	0.376813
ARSB	XLOC_015932	0.611212	0.19735	0.249434
ARSB	XLOC_023658	0.745769	0.0887341	0.14744
ARSB	XLOC_005292	0.784149	0.0648591	0.123018
ARSB	XLOC_011194	0.792361	0.0601951	0.118027
ARSB	XLOC_019584	0.840876	0.0359663	0.0897154
ARSB	XLOC_005053	0.86312	0.0268221	0.077526
ARSB	XLOC_002110	0.864946	0.0261277	0.0765176
ARSB	XLOC_012115	0.924028	0.00843832	0.0330316
ARSB	XLOC_019411	0.975374	0.000902181	0.00563892
ARSB	XLOC_017447	0.97938	0.000633419	0.00428821
ARSB	XLOC_002731	0.993107	7.11134e-05	0.000813866
ARSB	XLOC_011737	0.993712	5.91771e-05	0.000709484
ARSB	XLOC_021768	0.998091	5.46369e-06	0.000132704
ARSB	XLOC_003635	0.999053	1.34583e-06	5.47752e-05
ARSI	XLOC_013668	-0.662778	0.151404	0.31852
ARSI	XLOC_011777	-0.595544	0.212295	0.26309
ARSI	XLOC_003704	-0.343227	0.505377	0.535398
ARSI	XLOC_017606	-0.222776	0.671364	0.692913
ARSI	XLOC_005292	-0.0410473	0.938464	0.94345
ARSI	XLOC_009502	-0.0378594	0.943238	0.947849
ARSI	XLOC_015754	0.100185	0.850225	0.861548
ARSI	XLOC_019200	0.212143	0.686559	0.790461
ARSI	XLOC_003497	0.222251	0.672113	0.779697
ARSI	XLOC_026943	0.5669	0.240744	0.289024
ARSI	XLOC_015932	0.590458	0.217242	0.2676
ARSI	XLOC_005053	0.794067	0.0592459	0.117008
ARSI	XLOC_019584	0.796516	0.0578957	0.115529
ARSI	XLOC_002110	0.801888	0.054985	0.112302
ARSI	XLOC_012115	0.868214	0.024907	0.0808262
ARSI	XLOC_011194	0.873583	0.0229618	0.0719036
ARSI	XLOC_023658	0.909115	0.0120148	0.0532141
ARSI	XLOC_019411	0.916993	0.0100494	0.0381045
ARSI	XLOC_017447	0.925549	0.0081081	0.0319769
ARSI	XLOC_011737	0.953399	0.00320686	0.0150846
ARSI	XLOC_002731	0.955953	0.00286753	0.013818
ARSI	XLOC_003635	0.972835	0.00109685	0.00655943
ARSI	XLOC_021768	0.987376	0.000238037	0.00203466
ASAP1	XLOC_003704	-0.700665	0.120992	0.178563
ASAP1	XLOC_017606	-0.604019	0.204156	0.255682
ASAP1	XLOC_013668	-0.496859	0.316042	0.497813
ASAP1	XLOC_011777	-0.440275	0.382259	0.41978
ASAP1	XLOC_009502	-0.412256	0.416649	0.451915
ASAP1	XLOC_015754	-0.239643	0.647416	0.67021
ASAP1	XLOC_003497	-0.117823	0.824083	0.888032
ASAP1	XLOC_019200	0.260018	0.618763	0.741489
ASAP1	XLOC_026943	0.321358	0.534556	0.563021
ASAP1	XLOC_005292	0.524723	0.285153	0.329714
ASAP1	XLOC_011194	0.799304	0.0563766	0.113823
ASAP1	XLOC_015932	0.801985	0.0549328	0.112243
ASAP1	XLOC_023658	0.807985	0.0517649	0.108713
ASAP1	XLOC_019584	0.826941	0.0423328	0.0976559
ASAP1	XLOC_005053	0.840175	0.0362749	0.0901167
ASAP1	XLOC_002110	0.857346	0.0290736	0.0806673
ASAP1	XLOC_012115	0.947097	0.00412408	0.0184206
ASAP1	XLOC_021768	0.978665	0.00067794	0.00451914
ASAP1	XLOC_003635	0.99352	6.28584e-05	0.000741903
ASAP1	XLOC_019411	0.997072	1.2845e-05	0.000238136
ASAP1	XLOC_017447	0.997809	7.19583e-06	0.000159888
ASAP1	XLOC_002731	0.997854	6.90288e-06	0.000155642
ASAP1	XLOC_011737	0.998527	3.25274e-06	9.48765e-05
ASAP3	XLOC_011194	-0.877953	0.0214341	0.0695507
ASAP3	XLOC_002110	-0.853128	0.0307729	0.0829615
ASAP3	XLOC_005053	-0.838386	0.0370679	0.0911347
ASAP3	XLOC_019584	-0.829175	0.0412793	0.0964115
ASAP3	XLOC_023658	-0.817081	0.0471288	0.103333
ASAP3	XLOC_026943	-0.664484	0.149972	0.205726
ASAP3	XLOC_015932	-0.513621	0.297317	0.340886
ASAP3	XLOC_005292	-0.430934	0.393612	0.430376
ASAP3	XLOC_009502	0.339415	0.510428	0.540173
ASAP3	XLOC_015754	0.357451	0.48666	0.517703
ASAP3	XLOC_011777	0.50861	0.30287	0.345986
ASAP3	XLOC_017606	0.528564	0.280989	0.325917
ASAP3	XLOC_003704	0.676148	0.140337	0.196737
ASB11	XLOC_013668	-0.703534	0.118809	0.26938
ASB11	XLOC_003497	0.024817	0.962782	0.977756
ASB11	XLOC_021768	0.0836495	0.874818	0.922306
ASB11	XLOC_011737	0.102914	0.846174	0.902886
ASB11	XLOC_003635	0.107952	0.8387	0.89779
ASB11	XLOC_017447	0.108315	0.838163	0.897456
ASB11	XLOC_002731	0.118327	0.823339	0.887538
ASB11	XLOC_019411	0.120142	0.820654	0.885725
ASB11	XLOC_012115	0.399835	0.432208	0.604002
ASB11	XLOC_019200	0.971498	0.00120694	0.00706997
ASCL2	XLOC_019584	-0.890991	0.0171767	0.0625988
ASCL2	XLOC_002110	-0.886444	0.0186102	0.0650362
ASCL2	XLOC_011194	-0.877837	0.021474	0.0696143
ASCL2	XLOC_005053	-0.863066	0.0268425	0.0775607
ASCL2	XLOC_023658	-0.820739	0.0453216	0.101234
ASCL2	XLOC_026943	-0.718294	0.107859	0.166051
ASCL2	XLOC_021768	-0.613657	0.195059	0.373305
ASCL2	XLOC_005292	-0.600999	0.207042	0.258318
ASCL2	XLOC_003635	-0.570694	0.236894	0.420856
ASCL2	XLOC_011737	-0.5365	0.272461	0.456409
ASCL2	XLOC_012115	-0.531823	0.277475	0.460864
ASCL2	XLOC_002731	-0.523252	0.286753	0.469285
ASCL2	XLOC_003497	-0.494908	0.318248	0.499863
ASCL2	XLOC_015932	-0.472427	0.344079	0.384147
ASCL2	XLOC_017447	-0.466759	0.350706	0.53097
ASCL2	XLOC_019411	-0.466583	0.350913	0.531166
ASCL2	XLOC_019200	-0.461341	0.357084	0.536973
ASCL2	XLOC_011777	0.448629	0.372203	0.410405
ASCL2	XLOC_015754	0.503423	0.308658	0.351357
ASCL2	XLOC_009502	0.527922	0.281683	0.326538
ASCL2	XLOC_017606	0.712763	0.111908	0.169993
ASCL2	XLOC_013668	0.822078	0.0446682	0.129386
ASCL2	XLOC_003704	0.837094	0.037646	0.0918821
ASF1B	XLOC_003704	-0.709725	0.11416	0.172108
ASF1B	XLOC_011777	-0.632593	0.177685	0.231349
ASF1B	XLOC_017606	-0.562776	0.244956	0.292907
ASF1B	XLOC_013668	-0.532968	0.276244	0.607715
ASF1B	XLOC_009502	-0.344787	0.503313	0.533449
ASF1B	XLOC_015754	-0.291549	0.575068	0.601472
ASF1B	XLOC_000504	-0.0789702	0.881791	0.968039
ASF1B	XLOC_012808	0.0720099	0.892172	0.972651
ASF1B	XLOC_020482	0.104032	0.844515	0.952277
ASF1B	XLOC_019155	0.10859	0.837756	0.949345
ASF1B	XLOC_013477	0.192882	0.714265	0.894396
ASF1B	XLOC_015932	0.568093	0.23953	0.287938
ASF1B	XLOC_005292	0.629746	0.180254	0.233686
ASF1B	XLOC_026943	0.715222	0.1101	0.16825
ASF1B	XLOC_023658	0.909156	0.0120041	0.053196
ASF1B	XLOC_011194	0.950397	0.00362961	0.0328255
ASF1B	XLOC_005053	0.957254	0.00270182	0.0295175
ASF1B	XLOC_019584	0.967667	0.00155121	0.0245916
ASF1B	XLOC_002110	0.968567	0.00146651	0.0241574
ASIC1	XLOC_013668	-0.12782	0.809314	0.937111
ASIC1	XLOC_000504	-0.0549504	0.917657	0.980469
ASIC1	XLOC_012808	-0.0358025	0.946319	0.986789
ASIC1	XLOC_019155	-0.0172953	0.97406	0.993428
ASIC1	XLOC_013477	0.10096	0.849075	0.954199
ASIC1	XLOC_020482	0.602713	0.205402	0.510675
ASPM	XLOC_013668	-0.560085	0.247721	0.432045
ASPM	XLOC_003497	-0.038533	0.942229	0.96548
ASPM	XLOC_019200	0.284591	0.584639	0.717757
ASPM	XLOC_012115	0.948401	0.00392502	0.0177089
ASPM	XLOC_019411	0.988724	0.000190017	0.00171272
ASPM	XLOC_021768	0.990845	0.000125329	0.00124752
ASPM	XLOC_017447	0.991276	0.000113835	0.00115888
ASPM	XLOC_011737	0.998501	3.3696e-06	9.68325e-05
ASPM	XLOC_002731	0.998891	1.84308e-06	6.63003e-05
ASPM	XLOC_003635	0.999008	1.47564e-06	5.77505e-05
ATF6	XLOC_013668	-0.526688	0.28302	0.465954
ATF6	XLOC_003497	-0.0724101	0.891575	0.933693
ATF6	XLOC_019200	0.263937	0.613288	0.737693
ATF6	XLOC_012115	0.946751	0.00417774	0.0186106
ATF6	XLOC_021768	0.98624	0.000282708	0.00231238
ATF6	XLOC_019411	0.993442	6.43667e-05	0.000755517
ATF6	XLOC_017447	0.995764	2.68722e-05	0.000399596
ATF6	XLOC_003635	0.997457	9.69451e-06	0.000195936
ATF6	XLOC_011737	0.999177	1.01489e-06	4.60386e-05
ATF6	XLOC_002731	0.999964	1.95751e-09	4.21632e-06
ATP11C	XLOC_013668	-0.652472	0.160177	0.330372
ATP11C	XLOC_011777	-0.611738	0.196856	0.248992
ATP11C	XLOC_003704	-0.490412	0.323355	0.364971
ATP11C	XLOC_017606	-0.356737	0.487594	0.518584
ATP11C	XLOC_009502	-0.159227	0.763178	0.779896
ATP11C	XLOC_015754	-0.127412	0.809916	0.823797
ATP11C	XLOC_003497	0.171215	0.745687	0.833581
ATP11C	XLOC_019200	0.240431	0.646302	0.760553
ATP11C	XLOC_026943	0.367384	0.473717	0.505548
ATP11C	XLOC_015932	0.589143	0.218528	0.268774
ATP11C	XLOC_023658	0.643895	0.167637	0.222071
ATP11C	XLOC_011194	0.691255	0.12827	0.185434
ATP11C	XLOC_019584	0.752705	0.0841703	0.142895
ATP11C	XLOC_002110	0.785085	0.0643191	0.122447
ATP11C	XLOC_005053	0.792407	0.0601692	0.118
ATP11C	XLOC_005292	0.829039	0.041343	0.0964939
ATP11C	XLOC_012115	0.891368	0.0170604	0.0590458
ATP11C	XLOC_019411	0.936076	0.00599886	0.0249836
ATP11C	XLOC_017447	0.943064	0.00477033	0.0207397
ATP11C	XLOC_011737	0.968345	0.00148719	0.00831586
ATP11C	XLOC_002731	0.969379	0.00139215	0.00790431
ATP11C	XLOC_003635	0.983775	0.000392751	0.00297169
ATP11C	XLOC_021768	0.994491	4.54364e-05	0.000583559
ATP1B3	XLOC_011777	-0.690376	0.12896	0.186083
ATP1B3	XLOC_003704	-0.608894	0.199534	0.251446
ATP1B3	XLOC_017606	-0.449886	0.370699	0.408984
ATP1B3	XLOC_009502	-0.22031	0.674882	0.69624
ATP1B3	XLOC_015754	-0.156606	0.767012	0.7835
ATP1B3	XLOC_005292	0.544613	0.263847	0.310146
ATP1B3	XLOC_026943	0.623819	0.185651	0.238728
ATP1B3	XLOC_015932	0.67887	0.138128	0.194663
ATP1B3	XLOC_023658	0.933774	0.00643361	0.0408658
ATP1B3	XLOC_019584	0.952254	0.00336505	0.0319071
ATP1B3	XLOC_011194	0.964023	0.00191824	0.0263559
ATP1B3	XLOC_005053	0.970943	0.00125421	0.0230731
ATP1B3	XLOC_002110	0.975987	0.000858044	0.0207029
ATP2B1	XLOC_013668	-0.518699	0.291729	0.473923
ATP2B1	XLOC_003497	-0.0727105	0.891126	0.933381
ATP2B1	XLOC_019200	0.252822	0.628847	0.74819
ATP2B1	XLOC_012115	0.942624	0.00484349	0.0209891
ATP2B1	XLOC_021768	0.98717	0.000245857	0.00208343
ATP2B1	XLOC_019411	0.993189	6.94267e-05	0.000798741
ATP2B1	XLOC_017447	0.99551	3.01935e-05	0.000433929
ATP2B1	XLOC_003635	0.99774	7.65809e-06	0.00016696
ATP2B1	XLOC_011737	0.999645	1.88528e-07	1.89095e-05
ATP2B1	XLOC_002731	0.999691	1.43165e-07	1.67901e-05
ATP2B4	XLOC_013668	-0.542688	0.265882	0.450139
ATP2B4	XLOC_003497	-0.0714075	0.893071	0.934767
ATP2B4	XLOC_019200	0.288034	0.579897	0.714498
ATP2B4	XLOC_012115	0.953341	0.00321481	0.015115
ATP2B4	XLOC_021768	0.985965	0.000294096	0.00238385
ATP2B4	XLOC_019411	0.993252	6.81507e-05	0.000787638
ATP2B4	XLOC_017447	0.995115	3.57341e-05	0.00049025
ATP2B4	XLOC_003635	0.997363	1.04238e-05	0.000205898
ATP2B4	XLOC_011737	0.999079	1.2732e-06	5.29267e-05
ATP2B4	XLOC_002731	0.999663	1.69984e-07	1.80346e-05
ATP4B	XLOC_011777	-0.613673	0.195043	0.247315
ATP4B	XLOC_003704	-0.412636	0.416175	0.451486
ATP4B	XLOC_017606	-0.290169	0.576962	0.60327
ATP4B	XLOC_009502	-0.0934838	0.860183	0.870844
ATP4B	XLOC_005292	0.0460233	0.931014	0.936567
ATP4B	XLOC_015754	0.0622495	0.906746	0.914157
ATP4B	XLOC_026943	0.576871	0.230679	0.279876
ATP4B	XLOC_015932	0.642628	0.168751	0.223095
ATP4B	XLOC_005053	0.848901	0.0325216	0.0852735
ATP4B	XLOC_019584	0.853673	0.0305507	0.0826618
ATP4B	XLOC_002110	0.858412	0.0286514	0.0800848
ATP4B	XLOC_011194	0.914143	0.0107406	0.0506618
ATP4B	XLOC_023658	0.949749	0.00372433	0.0331352
ATP5D	XLOC_002110	-0.88549	0.0189182	0.0655313
ATP5D	XLOC_019584	-0.873282	0.0230688	0.0720703
ATP5D	XLOC_005053	-0.869964	0.0242645	0.0738011
ATP5D	XLOC_011194	-0.848832	0.0325504	0.0853078
ATP5D	XLOC_023658	-0.79201	0.0603908	0.118235
ATP5D	XLOC_005292	-0.690436	0.128912	0.186035
ATP5D	XLOC_026943	-0.610794	0.197744	0.249795
ATP5D	XLOC_015932	-0.549789	0.258408	0.305181
ATP5D	XLOC_015754	0.418485	0.408917	0.444694
ATP5D	XLOC_009502	0.44648	0.374782	0.412797
ATP5D	XLOC_011777	0.500079	0.312411	0.354871
ATP5D	XLOC_017606	0.641452	0.169788	0.224037
ATP5D	XLOC_003704	0.772736	0.0716043	0.130115
ATP6AP1	XLOC_011777	-0.762793	0.0777274	0.136394
ATP6AP1	XLOC_003704	-0.550348	0.257824	0.304634
ATP6AP1	XLOC_017606	-0.379607	0.45794	0.490641
ATP6AP1	XLOC_009502	-0.144349	0.784981	0.800372
ATP6AP1	XLOC_015754	-0.111867	0.8329	0.845345
ATP6AP1	XLOC_015932	0.607855	0.200515	0.252346
ATP6AP1	XLOC_005292	0.621254	0.188007	0.240872
ATP6AP1	XLOC_026943	0.679496	0.137623	0.194201
ATP6AP1	XLOC_023658	0.917791	0.00985961	0.0487894
ATP6AP1	XLOC_011194	0.959894	0.00238044	0.0282578
ATP6AP1	XLOC_019584	0.960353	0.00232666	0.0280403
ATP6AP1	XLOC_002110	0.977302	0.000766924	0.0200351
ATP6AP1	XLOC_005053	0.978928	0.000661345	0.0192544
ATP6AP2	XLOC_011777	-0.631879	0.178327	0.231929
ATP6AP2	XLOC_003704	-0.524012	0.285926	0.330428
ATP6AP2	XLOC_017606	-0.38358	0.452849	0.48585
ATP6AP2	XLOC_009502	-0.165578	0.753903	0.771139
ATP6AP2	XLOC_015754	-0.067037	0.899595	0.907565
ATP6AP2	XLOC_026943	0.344159	0.504144	0.534234
ATP6AP2	XLOC_005292	0.598707	0.209243	0.260323
ATP6AP2	XLOC_015932	0.79773	0.0572321	0.11479
ATP6AP2	XLOC_023658	0.810221	0.0506063	0.107382
ATP6AP2	XLOC_011194	0.8258	0.0428753	0.0983088
ATP6AP2	XLOC_019584	0.83317	0.0394266	0.094124
ATP6AP2	XLOC_002110	0.883628	0.0195257	0.0665578
ATP6AP2	XLOC_005053	0.884512	0.0192359	0.066061
ATP6V0A1	XLOC_013668	-0.691776	0.127862	0.283822
ATP6V0A1	XLOC_003497	0.0901066	0.865206	0.915704
ATP6V0A1	XLOC_019200	0.373874	0.465319	0.630613
ATP6V0A1	XLOC_012115	0.947186	0.00411026	0.0183712
ATP6V0A1	XLOC_019411	0.953558	0.00318524	0.0150082
ATP6V0A1	XLOC_017447	0.957631	0.00265466	0.0130169
ATP6V0A1	XLOC_011737	0.973672	0.00103064	0.00625007
ATP6V0A1	XLOC_002731	0.977358	0.000763215	0.00495369
ATP6V0A1	XLOC_021768	0.983571	0.000402668	0.00303043
ATP6V0A1	XLOC_003635	0.983824	0.000390383	0.00295832
ATP6V0C	XLOC_011777	-0.695698	0.124811	0.182178
ATP6V0C	XLOC_003704	-0.60043	0.207587	0.258811
ATP6V0C	XLOC_017606	-0.438123	0.384865	0.422217
ATP6V0C	XLOC_009502	-0.217246	0.679258	0.700433
ATP6V0C	XLOC_015754	-0.189818	0.718693	0.737855
ATP6V0C	XLOC_005292	0.477434	0.338263	0.378762
ATP6V0C	XLOC_015932	0.526437	0.283292	0.328001
ATP6V0C	XLOC_026943	0.780474	0.066998	0.125273
ATP6V0C	XLOC_023658	0.942167	0.0049202	0.0368622
ATP6V0C	XLOC_005053	0.955364	0.00294412	0.0304247
ATP6V0C	XLOC_019584	0.960389	0.00232246	0.028022
ATP6V0C	XLOC_002110	0.962294	0.00210586	0.0272079
ATP6V0C	XLOC_011194	0.982449	0.000459329	0.0176187
ATP6V0D2	XLOC_013668	-0.731192	0.0986752	0.235107
ATP6V0D2	XLOC_011777	-0.624169	0.18533	0.238432
ATP6V0D2	XLOC_003704	-0.353928	0.491275	0.522081
ATP6V0D2	XLOC_017606	-0.232017	0.658219	0.680471
ATP6V0D2	XLOC_009502	-0.0280479	0.957939	0.961374
ATP6V0D2	XLOC_005292	0.0252071	0.962197	0.965295
ATP6V0D2	XLOC_019200	0.0552477	0.917213	0.95046
ATP6V0D2	XLOC_015754	0.162748	0.758033	0.775052
ATP6V0D2	XLOC_026943	0.407178	0.422987	0.457831
ATP6V0D2	XLOC_012115	0.577001	0.230549	0.413843
ATP6V0D2	XLOC_019411	0.631217	0.178924	0.354008
ATP6V0D2	XLOC_003497	0.642958	0.168461	0.340995
ATP6V0D2	XLOC_017447	0.648586	0.16354	0.33474
ATP6V0D2	XLOC_011737	0.709558	0.114284	0.261765
ATP6V0D2	XLOC_002731	0.714167	0.110874	0.256121
ATP6V0D2	XLOC_003635	0.758537	0.0804176	0.202052
ATP6V0D2	XLOC_015932	0.796826	0.0577261	0.11533
ATP6V0D2	XLOC_021768	0.811544	0.0499268	0.141226
ATP6V0D2	XLOC_019584	0.822874	0.0442817	0.100019
ATP6V0D2	XLOC_005053	0.84809	0.0328623	0.0857165
ATP6V0D2	XLOC_002110	0.853375	0.0306722	0.0828241
ATP6V0D2	XLOC_011194	0.891563	0.0170004	0.062301
ATP6V0D2	XLOC_023658	0.943189	0.00474954	0.0363476
ATP6V1C2	XLOC_011194	-0.925798	0.00805459	0.0448003
ATP6V1C2	XLOC_005053	-0.909449	0.0119281	0.0530343
ATP6V1C2	XLOC_002110	-0.904176	0.0133334	0.0557453
ATP6V1C2	XLOC_019584	-0.875012	0.0224568	0.0711262
ATP6V1C2	XLOC_023658	-0.874199	0.0227433	0.0715606
ATP6V1C2	XLOC_026943	-0.679446	0.137663	0.194235
ATP6V1C2	XLOC_015932	-0.545731	0.262669	0.30909
ATP6V1C2	XLOC_005292	-0.449898	0.370685	0.408972
ATP6V1C2	XLOC_009502	0.0311499	0.95329	0.957124
ATP6V1C2	XLOC_015754	0.05285	0.920799	0.927186
ATP6V1C2	XLOC_017606	0.253732	0.62757	0.651331
ATP6V1C2	XLOC_003704	0.434797	0.388903	0.425979
ATP6V1C2	XLOC_011777	0.754885	0.0827584	0.141498
ATP9A	XLOC_013668	-0.444122	0.377617	0.702658
ATP9A	XLOC_020482	-0.298923	0.564971	0.825968
ATP9A	XLOC_000504	0.227885	0.66409	0.871075
ATP9A	XLOC_013477	0.44934	0.371353	0.697237
ATP9A	XLOC_019155	0.998067	5.59861e-06	0.000227711
ATP9A	XLOC_012808	0.999548	3.06487e-07	3.30665e-05
ATXN7L3B	XLOC_011194	-0.781454	0.0664243	0.124686
ATXN7L3B	XLOC_023658	-0.766688	0.0753013	0.133924
ATXN7L3B	XLOC_019584	-0.716239	0.109356	0.167509
ATXN7L3B	XLOC_002110	-0.701152	0.12062	0.178221
ATXN7L3B	XLOC_026943	-0.670917	0.144625	0.200733
ATXN7L3B	XLOC_005053	-0.662689	0.151479	0.207141
ATXN7L3B	XLOC_015932	-0.376402	0.462061	0.494508
ATXN7L3B	XLOC_005292	-0.0383006	0.942577	0.94724
ATXN7L3B	XLOC_011777	0.208962	0.69112	0.711708
ATXN7L3B	XLOC_015754	0.486637	0.327666	0.368965
ATXN7L3B	XLOC_009502	0.551921	0.256181	0.303155
ATXN7L3B	XLOC_017606	0.67714	0.139531	0.195971
ATXN7L3B	XLOC_003704	0.755509	0.0823562	0.141083
AXL	XLOC_013668	-0.490333	0.323445	0.504859
AXL	XLOC_003497	-0.131566	0.80379	0.87427
AXL	XLOC_019200	0.267141	0.608821	0.73458
AXL	XLOC_012115	0.950917	0.00355456	0.0163572
AXL	XLOC_021768	0.976006	0.000856638	0.00541527
AXL	XLOC_003635	0.992048	9.45992e-05	0.00100872
AXL	XLOC_011737	0.998125	5.27074e-06	0.000129757
AXL	XLOC_002731	0.998166	5.03963e-06	0.000125704
AXL	XLOC_019411	0.99834	4.13326e-06	0.000110436
AXL	XLOC_017447	0.99933	6.7229e-07	3.68712e-05
AZGP1	XLOC_019584	-0.876616	0.0218961	0.0702637
AZGP1	XLOC_002110	-0.85391	0.0304545	0.0825417
AZGP1	XLOC_011194	-0.841746	0.0355847	0.0892339
AZGP1	XLOC_005053	-0.82085	0.0452674	0.101172
AZGP1	XLOC_023658	-0.812339	0.0495205	0.106111
AZGP1	XLOC_021768	-0.694844	0.125472	0.280135
AZGP1	XLOC_026943	-0.681255	0.136206	0.19287
AZGP1	XLOC_003635	-0.654923	0.158072	0.327586
AZGP1	XLOC_011737	-0.620213	0.188967	0.366035
AZGP1	XLOC_002731	-0.605495	0.202752	0.382342
AZGP1	XLOC_017447	-0.554466	0.253532	0.437939
AZGP1	XLOC_019411	-0.553945	0.254073	0.438445
AZGP1	XLOC_005292	-0.531998	0.277287	0.322493
AZGP1	XLOC_012115	-0.527269	0.28239	0.465372
AZGP1	XLOC_015932	-0.471606	0.345036	0.385043
AZGP1	XLOC_003497	-0.465023	0.352745	0.532892
AZGP1	XLOC_019200	-0.18731	0.722322	0.81638
AZGP1	XLOC_011777	0.337176	0.513402	0.542991
AZGP1	XLOC_015754	0.552703	0.255366	0.302404
AZGP1	XLOC_009502	0.646729	0.165156	0.219794
AZGP1	XLOC_013668	0.686987	0.131632	0.289595
AZGP1	XLOC_017606	0.812696	0.0493388	0.105897
AZGP1	XLOC_003704	0.902511	0.013793	0.0565706
B3GALT6	XLOC_003497	-0.5317	0.277607	0.460955
B3GALT6	XLOC_013668	-0.0084603	0.98731	0.992472
B3GALT6	XLOC_019200	0.244568	0.640462	0.756265
B3GALT6	XLOC_021768	0.53173	0.277575	0.460955
B3GALT6	XLOC_003635	0.572881	0.234686	0.418367
B3GALT6	XLOC_011737	0.612923	0.195745	0.374135
B3GALT6	XLOC_002731	0.61794	0.19107	0.368649
B3GALT6	XLOC_012115	0.648442	0.163665	0.334908
B3GALT6	XLOC_019411	0.656284	0.156908	0.326043
B3GALT6	XLOC_017447	0.65816	0.155309	0.323805
B3GNT6	XLOC_013668	-0.443559	0.378296	0.703251
B3GNT6	XLOC_020482	-0.298991	0.564877	0.825937
B3GNT6	XLOC_000504	0.221136	0.673703	0.874465
B3GNT6	XLOC_013477	0.440609	0.381856	0.705783
B3GNT6	XLOC_019155	0.997789	7.32689e-06	0.000274396
B3GNT6	XLOC_012808	0.998929	1.71908e-06	9.71425e-05
B3GNT7	XLOC_011777	-0.536001	0.272994	0.318556
B3GNT7	XLOC_013668	-0.508005	0.303543	0.636587
B3GNT7	XLOC_003704	-0.430252	0.394446	0.431159
B3GNT7	XLOC_017606	-0.309608	0.550427	0.578059
B3GNT7	XLOC_009502	-0.128429	0.808416	0.822385
B3GNT7	XLOC_000504	-0.043459	0.934853	0.984469
B3GNT7	XLOC_005292	-0.0342671	0.948619	0.952795
B3GNT7	XLOC_015754	-0.00822069	0.987669	0.988739
B3GNT7	XLOC_012808	0.152738	0.772675	0.921909
B3GNT7	XLOC_019155	0.186454	0.72356	0.898429
B3GNT7	XLOC_020482	0.250766	0.631735	0.858779
B3GNT7	XLOC_013477	0.254529	0.626452	0.856859
B3GNT7	XLOC_026943	0.565398	0.242275	0.290429
B3GNT7	XLOC_015932	0.608333	0.200063	0.25192
B3GNT7	XLOC_019584	0.79296	0.059861	0.117673
B3GNT7	XLOC_005053	0.793281	0.059682	0.117487
B3GNT7	XLOC_002110	0.80652	0.0525303	0.109566
B3GNT7	XLOC_011194	0.881905	0.0200962	0.0674748
B3GNT7	XLOC_023658	0.905453	0.0129861	0.0550921
B4GALNT3	XLOC_019584	-0.832596	0.0396906	0.0944419
B4GALNT3	XLOC_002110	-0.808227	0.0516391	0.108576
B4GALNT3	XLOC_011194	-0.801428	0.0552311	0.112572
B4GALNT3	XLOC_023658	-0.771829	0.0721537	0.130683
B4GALNT3	XLOC_005053	-0.770233	0.0731244	0.131684
B4GALNT3	XLOC_026943	-0.659503	0.154169	0.209653
B4GALNT3	XLOC_021768	-0.578636	0.228915	0.411997
B4GALNT3	XLOC_003635	-0.540434	0.268271	0.452295
B4GALNT3	XLOC_011737	-0.514753	0.296068	0.478135
B4GALNT3	XLOC_002731	-0.491074	0.322601	0.50402
B4GALNT3	XLOC_005292	-0.4884	0.32565	0.367113
B4GALNT3	XLOC_019411	-0.453546	0.366329	0.54565
B4GALNT3	XLOC_017447	-0.451127	0.369216	0.548346
B4GALNT3	XLOC_015932	-0.442056	0.380108	0.417781
B4GALNT3	XLOC_012115	-0.378789	0.458991	0.625786
B4GALNT3	XLOC_003497	-0.361827	0.480944	0.642777
B4GALNT3	XLOC_019200	-0.00920679	0.98619	0.991806
B4GALNT3	XLOC_011777	0.253483	0.627919	0.651665
B4GALNT3	XLOC_013668	0.461813	0.356526	0.536409
B4GALNT3	XLOC_015754	0.616981	0.19196	0.244483
B4GALNT3	XLOC_009502	0.709966	0.113981	0.17194
B4GALNT3	XLOC_017606	0.859809	0.0281025	0.0793471
B4GALNT3	XLOC_003704	0.936503	0.00591971	0.0395519
B4GALT6	XLOC_013668	-0.473307	0.343054	0.523668
B4GALT6	XLOC_013668	-0.457525	0.3616	0.689957
B4GALT6	XLOC_020482	-0.293766	0.572026	0.829879
B4GALT6	XLOC_003497	-0.16096	0.760644	0.844395
B4GALT6	XLOC_000504	0.230789	0.659962	0.86963
B4GALT6	XLOC_019200	0.26987	0.605022	0.732112
B4GALT6	XLOC_013477	0.459923	0.358759	0.687751
B4GALT6	XLOC_012115	0.952807	0.00328816	0.0153862
B4GALT6	XLOC_021768	0.968728	0.00145159	0.00815991
B4GALT6	XLOC_003635	0.987666	0.000227257	0.00196379
B4GALT6	XLOC_011737	0.995739	2.71988e-05	0.000402928
B4GALT6	XLOC_002731	0.99601	2.38477e-05	0.000367921
B4GALT6	XLOC_019155	0.99771	7.85979e-06	0.000288496
B4GALT6	XLOC_012808	0.99843	3.69621e-06	0.000169578
B4GALT6	XLOC_019411	0.999556	2.95973e-07	2.40285e-05
B4GALT6	XLOC_017447	0.999948	4.03011e-09	5.335e-06
B9D1	XLOC_011194	-0.942099	0.00493174	0.0369019
B9D1	XLOC_002110	-0.921355	0.00903431	0.0469818
B9D1	XLOC_019584	-0.916865	0.0100799	0.0492678
B9D1	XLOC_023658	-0.91206	0.0112602	0.0516873
B9D1	XLOC_005053	-0.8982	0.0150173	0.0588368
B9D1	XLOC_026943	-0.695537	0.124935	0.182288
B9D1	XLOC_015932	-0.577701	0.229849	0.279116
B9D1	XLOC_005292	-0.403529	0.427561	0.462115
B9D1	XLOC_015754	0.377709	0.460379	0.492941
B9D1	XLOC_009502	0.445542	0.375909	0.413841
B9D1	XLOC_011777	0.491602	0.322	0.363709
B9D1	XLOC_017606	0.641053	0.17014	0.224369
B9D1	XLOC_003704	0.770113	0.0731974	0.131759
BAD	XLOC_021768	-0.906878	0.0126037	0.0459926
BAD	XLOC_003635	-0.884222	0.0193308	0.0655529
BAD	XLOC_002731	-0.864023	0.0264777	0.084965
BAD	XLOC_011737	-0.851103	0.0316049	0.0981356
BAD	XLOC_017447	-0.82084	0.045272	0.130803
BAD	XLOC_019411	-0.807111	0.052221	0.146103
BAD	XLOC_012115	-0.778946	0.0678967	0.178081
BAD	XLOC_003497	-0.386953	0.44854	0.617741
BAD	XLOC_019200	-0.199083	0.70532	0.804228
BAD	XLOC_013668	0.727462	0.101294	0.239716
BANF1	XLOC_012115	-0.749165	0.0864861	0.213184
BANF1	XLOC_002731	-0.669818	0.145532	0.310304
BANF1	XLOC_003635	-0.659792	0.153924	0.321954
BANF1	XLOC_017447	-0.652734	0.159951	0.330063
BANF1	XLOC_019411	-0.649991	0.16232	0.333211
BANF1	XLOC_011737	-0.639931	0.171133	0.344456
BANF1	XLOC_021768	-0.638095	0.172762	0.346518
BANF1	XLOC_019200	-0.524684	0.285195	0.467861
BANF1	XLOC_003497	-0.128533	0.808262	0.877363
BANF1	XLOC_013668	0.732512	0.0977555	0.233494
BARX2	XLOC_019584	-0.794902	0.0587841	0.116519
BARX2	XLOC_002110	-0.776323	0.0694518	0.127868
BARX2	XLOC_011194	-0.770924	0.0727032	0.131244
BARX2	XLOC_005053	-0.737324	0.0944356	0.153079
BARX2	XLOC_023658	-0.728646	0.100459	0.158906
BARX2	XLOC_026943	-0.646007	0.165787	0.220371
BARX2	XLOC_005292	-0.497931	0.314831	0.357137
BARX2	XLOC_003497	-0.46468	0.353148	0.533236
BARX2	XLOC_019200	-0.445255	0.376253	0.554818
BARX2	XLOC_015932	-0.415073	0.413145	0.448679
BARX2	XLOC_021768	-0.0433056	0.935082	0.961273
BARX2	XLOC_012115	-0.0414018	0.937933	0.962887
BARX2	XLOC_003635	-0.00500808	0.992488	0.995627
BARX2	XLOC_011737	0.0262026	0.960705	0.976501
BARX2	XLOC_002731	0.043443	0.934876	0.96121
BARX2	XLOC_019411	0.0828329	0.876035	0.923179
BARX2	XLOC_017447	0.0919054	0.86253	0.913919
BARX2	XLOC_011777	0.212063	0.686673	0.707477
BARX2	XLOC_013668	0.586605	0.221019	0.403336
BARX2	XLOC_015754	0.670802	0.144719	0.200819
BARX2	XLOC_009502	0.734927	0.0960829	0.15468
BARX2	XLOC_017606	0.876437	0.0219584	0.0703578
BARX2	XLOC_003704	0.953177	0.00323724	0.0314518
BCAP31	XLOC_019200	-0.402758	0.428529	0.600889
BCAP31	XLOC_003497	-0.00684422	0.989734	0.993983
BCAP31	XLOC_013668	0.0939861	0.859436	0.911853
BCAP31	XLOC_012115	0.359991	0.48334	0.644784
BCAP31	XLOC_019411	0.533971	0.275168	0.458847
BCAP31	XLOC_003635	0.547813	0.26048	0.444843
BCAP31	XLOC_011737	0.549122	0.259107	0.44345
BCAP31	XLOC_017447	0.55544	0.25252	0.436963
BCAP31	XLOC_002731	0.556623	0.251294	0.435695
BCAP31	XLOC_021768	0.560529	0.247263	0.431564
BCAR1	XLOC_011194	-0.95995	0.00237393	0.0282298
BCAR1	XLOC_002110	-0.947381	0.00408037	0.0342698
BCAR1	XLOC_005053	-0.934306	0.00633179	0.0406222
BCAR1	XLOC_019584	-0.928902	0.00740266	0.0432711
BCAR1	XLOC_023658	-0.92511	0.00820279	0.0451341
BCAR1	XLOC_026943	-0.669053	0.146165	0.202149
BCAR1	XLOC_015932	-0.62453	0.185	0.238133
BCAR1	XLOC_005292	-0.450463	0.370009	0.408341
BCAR1	XLOC_015754	0.259498	0.61949	0.643673
BCAR1	XLOC_009502	0.309579	0.550466	0.578092
BCAR1	XLOC_017606	0.523213	0.286796	0.331228
BCAR1	XLOC_011777	0.601375	0.206682	0.257986
BCAR1	XLOC_003704	0.673406	0.142577	0.198856
BCAS1	XLOC_011194	-0.830658	0.0405869	0.095557
BCAS1	XLOC_023658	-0.806771	0.0523989	0.109424
BCAS1	XLOC_002110	-0.769204	0.0737531	0.132339
BCAS1	XLOC_019584	-0.752096	0.0845668	0.143291
BCAS1	XLOC_005053	-0.738914	0.0933504	0.151987
BCAS1	XLOC_026943	-0.589638	0.218043	0.268334
BCAS1	XLOC_015932	-0.532114	0.277162	0.32237
BCAS1	XLOC_005292	-0.128703	0.808011	0.822011
BCAS1	XLOC_011777	0.309879	0.55006	0.577709
BCAS1	XLOC_015754	0.414123	0.414326	0.449779
BCAS1	XLOC_009502	0.4661	0.35148	0.391037
BCAS1	XLOC_017606	0.619892	0.189263	0.242001
BCAS1	XLOC_003704	0.725672	0.102561	0.160931
BCAT2,HSD17B14	XLOC_011194	-0.828177	0.0417483	0.0969748
BCAT2,HSD17B14	XLOC_005053	-0.818946	0.0462035	0.102253
BCAT2,HSD17B14	XLOC_002110	-0.814163	0.0485942	0.105049
BCAT2,HSD17B14	XLOC_019584	-0.767927	0.0745374	0.13317
BCAT2,HSD17B14	XLOC_023658	-0.760294	0.0793018	0.13801
BCAT2,HSD17B14	XLOC_026943	-0.574139	0.23342	0.282428
BCAT2,HSD17B14	XLOC_015932	-0.527238	0.282424	0.327206
BCAT2,HSD17B14	XLOC_005292	-0.461896	0.356429	0.395652
BCAT2,HSD17B14	XLOC_009502	0.0582391	0.91274	0.919724
BCAT2,HSD17B14	XLOC_015754	0.118862	0.822547	0.835644
BCAT2,HSD17B14	XLOC_017606	0.2606	0.617949	0.642199
BCAT2,HSD17B14	XLOC_003704	0.434601	0.389141	0.426204
BCAT2,HSD17B14	XLOC_011777	0.657606	0.15578	0.211133
BCCIP	XLOC_023658	-0.331489	0.52098	0.550139
BCCIP	XLOC_011194	-0.299703	0.563906	0.590848
BCCIP	XLOC_015932	-0.240948	0.645572	0.668471
BCCIP	XLOC_002110	-0.164691	0.755197	0.772371
BCCIP	XLOC_026943	-0.155846	0.768123	0.784561
BCCIP	XLOC_011777	-0.146848	0.781311	0.796931
BCCIP	XLOC_019584	-0.144216	0.785176	0.800553
BCCIP	XLOC_005053	-0.132083	0.803027	0.817366
BCCIP	XLOC_015754	0.197727	0.707275	0.727053
BCCIP	XLOC_009502	0.258663	0.620658	0.64478
BCCIP	XLOC_017606	0.26831	0.607193	0.631977
BCCIP	XLOC_003704	0.274337	0.598817	0.624024
BCCIP	XLOC_005292	0.616587	0.192327	0.244817
BCKDHA	XLOC_013477	-0.866034	0.0257181	0.116766
BCKDHA	XLOC_011194	-0.813048	0.0491597	0.105692
BCKDHA	XLOC_023658	-0.784212	0.0648228	0.122983
BCKDHA	XLOC_002110	-0.77968	0.0674638	0.12578
BCKDHA	XLOC_019584	-0.75875	0.0802821	0.138996
BCKDHA	XLOC_005053	-0.746075	0.0885307	0.147236
BCKDHA	XLOC_000504	-0.743381	0.0903303	0.297519
BCKDHA	XLOC_020482	-0.705275	0.117494	0.35756
BCKDHA	XLOC_015932	-0.575473	0.23208	0.281181
BCKDHA	XLOC_026943	-0.537849	0.271022	0.316755
BCKDHA	XLOC_012808	-0.251059	0.631324	0.858602
BCKDHA	XLOC_005292	-0.248986	0.634239	0.657721
BCKDHA	XLOC_019155	-0.208016	0.692477	0.883743
BCKDHA	XLOC_013668	-0.200581	0.703164	0.889039
BCKDHA	XLOC_011777	0.26289	0.614749	0.639149
BCKDHA	XLOC_015754	0.502951	0.309187	0.35186
BCKDHA	XLOC_009502	0.565959	0.241702	0.28991
BCKDHA	XLOC_017606	0.719385	0.107069	0.165289
BCKDHA	XLOC_003704	0.81725	0.0470446	0.103237
BCL2L14	XLOC_013668	-0.524368	0.285539	0.468153
BCL2L14	XLOC_003497	-0.0817887	0.87759	0.924247
BCL2L14	XLOC_019200	0.26857	0.606831	0.733215
BCL2L14	XLOC_012115	0.948809	0.00386371	0.0174802
BCL2L14	XLOC_021768	0.984741	0.000347475	0.00271204
BCL2L14	XLOC_019411	0.994562	4.4277e-05	0.000573104
BCL2L14	XLOC_017447	0.996473	1.86365e-05	0.000308222
BCL2L14	XLOC_003635	0.996892	1.44783e-05	0.00025918
BCL2L14	XLOC_011737	0.99926	8.20253e-07	4.09616e-05
BCL2L14	XLOC_002731	0.999848	3.45518e-08	9.60641e-06
BCL2L15	XLOC_021768	-0.784225	0.0648152	0.171986
BCL2L15	XLOC_011737	-0.779667	0.0674715	0.17727
BCL2L15	XLOC_003635	-0.778146	0.0683692	0.179064
BCL2L15	XLOC_012115	-0.77572	0.0698115	0.181854
BCL2L15	XLOC_002731	-0.76001	0.0794819	0.200273
BCL2L15	XLOC_019411	-0.752008	0.0846243	0.209777
BCL2L15	XLOC_017447	-0.745012	0.0892385	0.218144
BCL2L15	XLOC_019200	-0.469978	0.346937	0.527353
BCL2L15	XLOC_003497	-0.0107479	0.983879	0.990444
BCL2L15	XLOC_013668	0.603474	0.204676	0.384616
BDH1	XLOC_011194	-0.722047	0.10515	0.163453
BDH1	XLOC_005053	-0.710132	0.113857	0.171827
BDH1	XLOC_002110	-0.696031	0.124552	0.181929
BDH1	XLOC_019584	-0.646304	0.165528	0.220122
BDH1	XLOC_023658	-0.64072	0.170435	0.224642
BDH1	XLOC_026943	-0.545885	0.262507	0.308951
BDH1	XLOC_005292	-0.407365	0.422753	0.457613
BDH1	XLOC_015932	-0.397469	0.435193	0.469265
BDH1	XLOC_009502	-0.096739	0.855344	0.866337
BDH1	XLOC_015754	0.0253835	0.961933	0.965053
BDH1	XLOC_017606	0.0867495	0.870202	0.880182
BDH1	XLOC_003704	0.264884	0.611967	0.636512
BDH1	XLOC_011777	0.664687	0.149802	0.20556
BDH2	XLOC_026943	-0.570116	0.237479	0.286103
BDH2	XLOC_005292	-0.499084	0.313531	0.355929
BDH2	XLOC_019584	-0.462213	0.356055	0.395302
BDH2	XLOC_011194	-0.454309	0.36542	0.404084
BDH2	XLOC_002110	-0.449342	0.371349	0.409593
BDH2	XLOC_005053	-0.412303	0.416589	0.45186
BDH2	XLOC_023658	-0.348942	0.497831	0.528277
BDH2	XLOC_015932	-0.0516926	0.92253	0.928804
BDH2	XLOC_011777	-0.0327501	0.950892	0.954907
BDH2	XLOC_009502	0.738195	0.0938405	0.15248
BDH2	XLOC_017606	0.802011	0.0549188	0.112229
BDH2	XLOC_015754	0.849125	0.0324276	0.0851495
BDH2	XLOC_003704	0.85904	0.0284042	0.0797561
BEX5	XLOC_019200	-0.410259	0.419138	0.592978
BEX5	XLOC_012115	-0.330657	0.52209	0.674263
BEX5	XLOC_021768	-0.293771	0.57202	0.708749
BEX5	XLOC_002731	-0.270634	0.60396	0.731414
BEX5	XLOC_003635	-0.270611	0.603992	0.731424
BEX5	XLOC_011737	-0.269812	0.605103	0.732157
BEX5	XLOC_017447	-0.2501	0.632672	0.750949
BEX5	XLOC_019411	-0.238578	0.648923	0.762583
BEX5	XLOC_003497	-0.118062	0.823729	0.88781
BEX5	XLOC_013668	0.35035	0.495976	0.654908
BGN	XLOC_000504	-0.86658	0.025514	0.116048
BGN	XLOC_013477	-0.848794	0.0325662	0.140063
BGN	XLOC_020482	-0.812278	0.0495516	0.1925
BGN	XLOC_013668	-0.627544	0.182251	0.358134
BGN	XLOC_013668	-0.542876	0.265682	0.594655
BGN	XLOC_011777	-0.470378	0.34647	0.38639
BGN	XLOC_003704	-0.361192	0.481772	0.513107
BGN	XLOC_015754	-0.27572	0.5969	0.622197
BGN	XLOC_017606	-0.254786	0.62609	0.649938
BGN	XLOC_009502	-0.135541	0.797933	0.812539
BGN	XLOC_015932	-0.03956	0.940691	0.945507
BGN	XLOC_003497	-0.0247316	0.96291	0.977839
BGN	XLOC_021768	-0.0185218	0.972221	0.983527
BGN	XLOC_012808	0.00120658	0.99819	0.999542
BGN	XLOC_011737	0.00765212	0.988522	0.993248
BGN	XLOC_003635	0.00825642	0.987616	0.992674
BGN	XLOC_017447	0.0146728	0.977992	0.986861
BGN	XLOC_002731	0.0196197	0.970574	0.982548
BGN	XLOC_019411	0.0292527	0.956133	0.97371
BGN	XLOC_019155	0.0662964	0.900701	0.975728
BGN	XLOC_023658	0.266452	0.609781	0.634423
BGN	XLOC_012115	0.314272	0.544112	0.68964
BGN	XLOC_011194	0.37674	0.461626	0.494103
BGN	XLOC_002110	0.473572	0.342746	0.382905
BGN	XLOC_005053	0.487162	0.327065	0.368419
BGN	XLOC_019584	0.49943	0.313142	0.355563
BGN	XLOC_026943	0.536729	0.272217	0.317843
BGN	XLOC_019200	0.963369	0.00198821	0.0104031
BGN	XLOC_005292	0.994859	3.95703e-05	0.0108676
BHLHA15,LMTK2	XLOC_019584	-0.839446	0.0365971	0.090525
BHLHA15,LMTK2	XLOC_011194	-0.829909	0.0409362	0.0959973
BHLHA15,LMTK2	XLOC_002110	-0.826926	0.0423398	0.0976641
BHLHA15,LMTK2	XLOC_023658	-0.791645	0.0605949	0.118456
BHLHA15,LMTK2	XLOC_005053	-0.7911	0.0609005	0.118796
BHLHA15,LMTK2	XLOC_026943	-0.667097	0.14779	0.203686
BHLHA15,LMTK2	XLOC_003497	-0.550662	0.257496	0.441927
BHLHA15,LMTK2	XLOC_005292	-0.469422	0.347587	0.387427
BHLHA15,LMTK2	XLOC_015932	-0.469097	0.347967	0.387776
BHLHA15,LMTK2	XLOC_021768	-0.404811	0.425952	0.598749
BHLHA15,LMTK2	XLOC_003635	-0.348167	0.498852	0.65718
BHLHA15,LMTK2	XLOC_011737	-0.311349	0.548067	0.692371
BHLHA15,LMTK2	XLOC_002731	-0.287586	0.580513	0.714892
BHLHA15,LMTK2	XLOC_019411	-0.230366	0.660563	0.771175
BHLHA15,LMTK2	XLOC_017447	-0.230258	0.660717	0.771287
BHLHA15,LMTK2	XLOC_012115	-0.214579	0.683072	0.787979
BHLHA15,LMTK2	XLOC_019200	-0.11327	0.830821	0.89257
BHLHA15,LMTK2	XLOC_011777	0.285977	0.582728	0.608776
BHLHA15,LMTK2	XLOC_013668	0.549907	0.258285	0.442696
BHLHA15,LMTK2	XLOC_015754	0.602945	0.205181	0.256637
BHLHA15,LMTK2	XLOC_009502	0.671795	0.143901	0.200076
BHLHA15,LMTK2	XLOC_017606	0.829496	0.0411289	0.0962357
BHLHA15,LMTK2	XLOC_003704	0.920596	0.00920715	0.0473762
BICDL1	XLOC_023658	-0.704385	0.118166	0.175912
BICDL1	XLOC_011194	-0.696794	0.123963	0.181383
BICDL1	XLOC_019584	-0.695668	0.124834	0.182198
BICDL1	XLOC_002110	-0.666999	0.147871	0.203762
BICDL1	XLOC_005053	-0.616293	0.1926	0.24506
BICDL1	XLOC_026943	-0.538454	0.270377	0.316167
BICDL1	XLOC_015932	-0.427957	0.397255	0.433786
BICDL1	XLOC_005292	-0.158345	0.764468	0.781104
BICDL1	XLOC_011777	0.0370654	0.944427	0.94894
BICDL1	XLOC_015754	0.634578	0.175902	0.229696
BICDL1	XLOC_009502	0.787167	0.0631262	0.121185
BICDL1	XLOC_017606	0.891213	0.017108	0.0624778
BICDL1	XLOC_003704	0.921639	0.00897003	0.0468384
BICDL2	XLOC_005053	-0.862546	0.0270419	0.0778334
BICDL2	XLOC_011194	-0.861793	0.027332	0.0782395
BICDL2	XLOC_002110	-0.852413	0.0310656	0.0833426
BICDL2	XLOC_019584	-0.813286	0.0490383	0.105555
BICDL2	XLOC_023658	-0.795265	0.0585835	0.116294
BICDL2	XLOC_026943	-0.624613	0.184924	0.238058
BICDL2	XLOC_015932	-0.515356	0.295404	0.339145
BICDL2	XLOC_005292	-0.509963	0.301367	0.344612
BICDL2	XLOC_009502	-0.0123492	0.981477	0.983115
BICDL2	XLOC_015754	0.0466748	0.930039	0.93568
BICDL2	XLOC_017606	0.203634	0.698771	0.718954
BICDL2	XLOC_003704	0.388203	0.446947	0.480306
BICDL2	XLOC_011777	0.747723	0.0874373	0.146155
BID	XLOC_012115	-0.708003	0.115446	0.26382
BID	XLOC_002731	-0.598744	0.209207	0.390128
BID	XLOC_017447	-0.597605	0.210304	0.391376
BID	XLOC_019411	-0.594003	0.21379	0.395266
BID	XLOC_003635	-0.571388	0.236193	0.420073
BID	XLOC_011737	-0.565476	0.242196	0.426417
BID	XLOC_019200	-0.542498	0.266082	0.450328
BID	XLOC_021768	-0.537502	0.271392	0.455391
BID	XLOC_003497	0.0433197	0.935061	0.961273
BID	XLOC_013668	0.581841	0.225726	0.408572
BLNK	XLOC_011777	-0.717269	0.108605	0.166785
BLNK	XLOC_013668	-0.558404	0.249454	0.433813
BLNK	XLOC_003704	-0.518672	0.291759	0.335799
BLNK	XLOC_017606	-0.367159	0.474009	0.505822
BLNK	XLOC_009502	-0.131777	0.803479	0.81779
BLNK	XLOC_015754	-0.00609887	0.990852	0.991664
BLNK	XLOC_003497	0.00339669	0.994905	0.997013
BLNK	XLOC_019200	0.240931	0.645597	0.760043
BLNK	XLOC_005292	0.471751	0.344868	0.384882
BLNK	XLOC_026943	0.489306	0.324616	0.36614
BLNK	XLOC_015932	0.803435	0.0541592	0.111399
BLNK	XLOC_012115	0.930261	0.00712571	0.0287234
BLNK	XLOC_019584	0.936594	0.00590296	0.0395021
BLNK	XLOC_011194	0.94947	0.00376539	0.0332585
BLNK	XLOC_023658	0.950064	0.00367811	0.0329986
BLNK	XLOC_005053	0.970608	0.00128317	0.0232091
BLNK	XLOC_002110	0.971647	0.00119444	0.0227403
BLNK	XLOC_019411	0.981756	0.000496251	0.00355804
BLNK	XLOC_017447	0.985778	0.000301975	0.00243103
BLNK	XLOC_021768	0.995594	2.90766e-05	0.000422954
BLNK	XLOC_011737	0.99605	2.33689e-05	0.000362569
BLNK	XLOC_002731	0.996776	1.55742e-05	0.000272588
BLNK	XLOC_003635	0.999693	1.40962e-07	1.66766e-05
BLOC1S6	XLOC_026943	-0.485292	0.329207	0.370393
BLOC1S6	XLOC_023658	-0.375752	0.462898	0.495291
BLOC1S6	XLOC_011194	-0.372838	0.466657	0.498869
BLOC1S6	XLOC_019584	-0.299562	0.564098	0.591033
BLOC1S6	XLOC_002110	-0.255478	0.625121	0.649023
BLOC1S6	XLOC_011777	-0.22689	0.665505	0.687354
BLOC1S6	XLOC_005053	-0.20462	0.697354	0.717624
BLOC1S6	XLOC_015932	-0.00708867	0.989367	0.990302
BLOC1S6	XLOC_005292	0.331872	0.520468	0.549646
BLOC1S6	XLOC_015754	0.576959	0.230591	0.279795
BLOC1S6	XLOC_003704	0.61733	0.191636	0.244181
BLOC1S6	XLOC_009502	0.626464	0.183234	0.236465
BLOC1S6	XLOC_017606	0.629541	0.180439	0.233857
BLVRA	XLOC_019584	-0.976148	0.000846618	0.0206231
BLVRA	XLOC_011194	-0.974271	0.000984462	0.0214819
BLVRA	XLOC_002110	-0.973194	0.00106824	0.0219782
BLVRA	XLOC_005053	-0.961259	0.00222222	0.0276567
BLVRA	XLOC_023658	-0.93577	0.00605572	0.0399171
[truncated: 22,043 more rows]

## Sheet: SORTED IN JERSEY
JERSEY
candidate gene	corelated lncRNA in JERSEY	Pearson correlation coefficient	P-Value	Adjusted P-Value	COLOUR CODING
GPAM	XLOC_011777	-0.447901	0.373076	0.527264	JS1_JS2
	XLOC_026943	-0.334109	0.517485	0.59817
	XLOC_005292	-0.130006	0.80609	0.830347
	XLOC_003704	0.138782	0.793163	0.818866
	XLOC_017606	0.207384	0.693383	0.73203	JS1_JS3
	XLOC_019584	0.332166	0.520075	0.600041
	XLOC_009502	0.344999	0.503033	0.588218
	XLOC_011194	0.401937	0.429562	0.543825
	XLOC_002110	0.428711	0.396331	0.531642	JS2_JS3
	XLOC_005053	0.447069	0.374074	0.527414
	XLOC_023658	0.496145	0.316848	0.526098
	XLOC_015754	0.572984	0.234583	0.526098
	XLOC_015932	0.915104	0.0105049	0.0357253
ABCG2	XLOC_011777	-0.428578	0.396493	0.531652
	XLOC_026943	-0.343435	0.505101	0.589635
	XLOC_005292	-0.121423	0.81876	0.841365
	XLOC_003704	0.113503	0.830476	0.851628
	XLOC_017606	0.178617	0.734924	0.767684
	XLOC_009502	0.314733	0.543488	0.61579
	XLOC_019584	0.332999	0.518965	0.59928
	XLOC_011194	0.399627	0.43247	0.545203
	XLOC_002110	0.429545	0.39531	0.531325
	XLOC_005053	0.446175	0.375148	0.527626
	XLOC_023658	0.49456	0.318642	0.526098
	XLOC_015754	0.548578	0.259677	0.526098
	XLOC_015932	0.924593	0.0083149	0.0290617
SCAP	XLOC_002110	-0.78347	0.0652521	0.114734
	XLOC_023728	-0.720749	0.106083	0.165415
	XLOC_008525	-0.715139	0.110161	0.170227
	XLOC_014188	-0.705347	0.117439	0.178715
	XLOC_007175	-0.694467	0.125765	0.188312	JS1_JS3
	XLOC_026943	-0.690963	0.128498	0.191444
	XLOC_022303	-0.668655	0.146495	0.211392
	XLOC_005817	-0.636998	0.173739	0.239737
	XLOC_009668	-0.630941	0.179173	0.245228
	XLOC_019454	-0.627892	0.181935	0.248004
	XLOC_005292	-0.593527	0.214252	0.279737
	XLOC_011827	-0.589058	0.218611	0.283892
	XLOC_005034	-0.4166	0.411252	0.455462
	XLOC_015932	-0.30395	0.558115	0.587012
	XLOC_009932	0.356233	0.488254	0.523729
	XLOC_020132	0.865317	0.0259877	0.0562028
	XLOC_023491	0.868114	0.0249439	0.0544049
	XLOC_014062	0.873538	0.0229775	0.0509941
	XLOC_022241	0.900129	0.0144633	0.0353779
	XLOC_015281	0.943128	0.00475974	0.0152096
	XLOC_013593	0.992035	9.49076e-05	0.00173033
FASN	XLOC_011777	-0.422787	0.403605	0.533591
	XLOC_026943	-0.334094	0.517505	0.598176
	XLOC_005292	-0.11215	0.83248	0.853418
	XLOC_003704	0.0847588	0.873166	0.889606	JS2_JS3
	XLOC_017606	0.149701	0.777127	0.804522
	XLOC_009502	0.287451	0.5807	0.642067
	XLOC_019584	0.3474	0.499864	0.586091
	XLOC_011194	0.412996	0.415728	0.537453
	XLOC_002110	0.443488	0.378381	0.528164
	XLOC_005053	0.458521	0.360418	0.526098
	XLOC_023658	0.507426	0.304187	0.526098
	XLOC_015754	0.52458	0.285308	0.526098
	XLOC_015932	0.934838	0.00623086	0.0226329
	XLOC_003704	0.988952	0.000182425	0.00692183	JS1_JS2
SPTLC1	XLOC_022241	-0.886731	0.0185181	0.0429732
	XLOC_020132	-0.876766	0.021844	0.0489896
	XLOC_014062	-0.868112	0.0249445	0.054406
	XLOC_023491	-0.780693	0.0668696	0.116887
	XLOC_009932	-0.654592	0.158355	0.22402
	XLOC_013593	-0.652338	0.160293	0.226031
	XLOC_015281	-0.544955	0.263487	0.325573	JS1_JS3
	XLOC_015932	0.350613	0.495631	0.530328
	XLOC_005292	0.373874	0.465319	0.503342
	XLOC_007175	0.529267	0.28023	0.34058
	XLOC_005034	0.624367	0.185149	0.251221
	XLOC_011827	0.706468	0.116596	0.177741
	XLOC_009668	0.742192	0.0911297	0.147486
	XLOC_005817	0.814996	0.0481736	0.0910422
	XLOC_019454	0.817155	0.0470921	0.089469
	XLOC_022303	0.835556	0.0383394	0.0762981
	XLOC_002110	0.892856	0.0166048	0.0394314
	XLOC_026943	0.892976	0.0165683	0.0393626
	XLOC_014188	0.904558	0.0132291	0.0330003
	XLOC_023728	0.916062	0.0102726	0.0271253
	XLOC_008525	0.952385	0.00334676	0.0118376
UGCG	XLOC_022241	-0.755032	0.0826636	0.137075
	XLOC_020132	-0.66973	0.145605	0.210429
	XLOC_014062	-0.639484	0.171529	0.2375
	XLOC_023491	-0.578482	0.229069	0.293783
	XLOC_013593	-0.543817	0.264688	0.326673
	XLOC_009932	-0.501354	0.310978	0.367529
	XLOC_011777	-0.454304	0.365426	0.526469
	XLOC_015281	-0.418546	0.408841	0.453342
	XLOC_003704	-0.371865	0.467914	0.565424	JS2_JS3
	XLOC_015754	-0.326855	0.527177	0.604813
	XLOC_015932	-0.295416	0.569766	0.633956
	XLOC_017606	-0.257766	0.621915	0.673164
	XLOC_015932	-0.230085	0.660962	0.682723
	XLOC_009502	-0.154706	0.769793	0.797986
	XLOC_005034	0.114311	0.829281	0.841163
	XLOC_009668	0.261318	0.616945	0.641563
	XLOC_011827	0.327654	0.526107	0.557799
	XLOC_005817	0.34855	0.498347	0.53276
	XLOC_022303	0.393024	0.440819	0.481637
	XLOC_019454	0.438959	0.383852	0.431316
	XLOC_023658	0.45541	0.36411	0.526469
	XLOC_005292	0.455989	0.363423	0.526304
	XLOC_005292	0.496676	0.316248	0.372113
	XLOC_005053	0.500796	0.311605	0.526098
	XLOC_002110	0.503306	0.308789	0.526098
	XLOC_014188	0.513544	0.297401	0.355681
	XLOC_007175	0.547718	0.26058	0.322953
	XLOC_011194	0.555996	0.251944	0.526098
	XLOC_023728	0.556123	0.251813	0.314991
	XLOC_002110	0.569779	0.23782	0.302034
	XLOC_019584	0.577716	0.229834	0.526098
	XLOC_008525	0.673664	0.142366	0.206906
	XLOC_026943	0.975166	0.000917413	0.00510006
	XLOC_026943	0.985569	0.000310883	0.00291166
BDH1	XLOC_026943	-0.575446	0.232107	0.296652
	XLOC_005292	-0.367827	0.473143	0.510302
	XLOC_007175	-0.285137	0.583886	0.610871
	XLOC_015281	-0.206365	0.694847	0.714514
	XLOC_008525	-0.101933	0.84763	0.858257
	XLOC_013593	-0.0292289	0.956169	0.959388
	XLOC_019454	0.0382617	0.942635	0.946803
	XLOC_002110	0.0391888	0.941247	0.945503	JS1_JS3
	XLOC_023728	0.0555813	0.916714	0.922684
	XLOC_014062	0.12524	0.813122	0.826031
	XLOC_014188	0.12824	0.808694	0.821889
	XLOC_023491	0.165899	0.753434	0.7698
	XLOC_020132	0.16665	0.752339	0.768766
	XLOC_022303	0.239414	0.647741	0.670359
	XLOC_022241	0.242091	0.643958	0.666835
	XLOC_005817	0.258433	0.620981	0.645349
	XLOC_009668	0.337754	0.512634	0.545625
	XLOC_005034	0.38754	0.447792	0.487844
	XLOC_011827	0.441182	0.381163	0.428954
	XLOC_009932	0.443743	0.378073	0.426255
	XLOC_015932	0.665661	0.148987	0.214089
LALBA	XLOC_011777	-0.427355	0.397991	0.532152
	XLOC_026943	-0.393421	0.440316	0.549363
	XLOC_005292	-0.152163	0.773516	0.801233
	XLOC_003704	0.210094	0.689495	0.728669
	XLOC_019584	0.265928	0.61051	0.664386	JS2_JS3
	XLOC_017606	0.271952	0.602128	0.658142
	XLOC_011194	0.334255	0.517291	0.598055
	XLOC_002110	0.364538	0.477414	0.571536
	XLOC_005053	0.386113	0.449612	0.554544
	XLOC_009502	0.397901	0.434648	0.546249
	XLOC_023658	0.430544	0.394088	0.531103
	XLOC_015754	0.61981	0.18934	0.491509
	XLOC_015932	0.882907	0.0197636	0.0633522
SLC2A8	XLOC_002110	-0.900298	0.0144153	0.0352849
	XLOC_008525	-0.870004	0.0242501	0.0532109
	XLOC_023728	-0.847666	0.0330408	0.067908
	XLOC_026943	-0.826322	0.0426265	0.0828266
	XLOC_014188	-0.821955	0.0447281	0.0859813
	XLOC_007175	-0.793983	0.0592923	0.106709
	XLOC_022303	-0.775497	0.0699451	0.120907
	XLOC_019454	-0.772417	0.0717974	0.123302
	XLOC_005817	-0.733491	0.0970761	0.154656	JS1_JS3
	XLOC_009668	-0.722345	0.104936	0.164042
	XLOC_005292	-0.679828	0.137355	0.201382
	XLOC_011827	-0.676685	0.1399	0.204206
	XLOC_005034	-0.552206	0.255884	0.318697
	XLOC_015932	-0.342763	0.505991	0.539658
	XLOC_009932	0.546622	0.261731	0.323986
	XLOC_015281	0.818019	0.0466622	0.0888378
	XLOC_023491	0.892175	0.0168125	0.0398186
	XLOC_013593	0.909186	0.0119963	0.0305767
	XLOC_014062	0.947134	0.00411829	0.0137033
	XLOC_020132	0.950994	0.00354354	0.0123157
	XLOC_022241	0.980248	0.000581362	0.00401872

## Sheet: SORTED IN KASHMIRI
KASHMIRI
candidate gene	corelated lncRNA in KASHMIRI	Pearson correlation coefficient	P-Value	Adjusted P-Value	COLOUR CODING
LPL	XLOC_019584	-0.624759	0.184791	0.237934	KS1_KS2
	XLOC_026943	-0.619964	0.189197	0.24194
	XLOC_011194	-0.600466	0.207553	0.258778
	XLOC_002110	-0.591527	0.216199	0.266641
	XLOC_023658	-0.545162	0.263268	0.309616	KS2_KS3
	XLOC_005053	-0.542918	0.265638	0.311794
	XLOC_005292	-0.411923	0.417063	0.452297
	XLOC_015932	-0.210179	0.689374	0.710065
	XLOC_011777	-0.0165924	0.975114	0.977222	KS1_KS3
	XLOC_015754	0.839218	0.0366981	0.0906466
	XLOC_009502	0.862444	0.0270809	0.0778861
	XLOC_017606	0.947651	0.00403887	0.0341343
	XLOC_003704	0.987577	0.000230535	0.015
GPAM	XLOC_019584	-0.799872	0.0560691	0.113482
	XLOC_011194	-0.787416	0.0629846	0.121038
	XLOC_002110	-0.778659	0.0680657	0.126413
	XLOC_023658	-0.74816	0.0871488	0.145876
	XLOC_005053	-0.738431	0.0936796	0.152322
	XLOC_026943	-0.674795	0.141441	0.197752
	XLOC_005292	-0.437277	0.38589	0.423172
	XLOC_015932	-0.40372	0.427321	0.461882
	XLOC_011777	0.211866	0.686957	0.707751
	XLOC_015754	0.664087	0.150304	0.206031
	XLOC_009502	0.728983	0.100222	0.158684
	XLOC_017606	0.869492	0.0244371	0.0740608
	XLOC_003704	0.946871	0.00415912	0.0345298
VLDLR	XLOC_013668	-0.508539	0.302949	0.635968
	XLOC_020482	-0.43067	0.393934	0.71461	KS2_KS3
	XLOC_000504	0.169309	0.748463	0.910922
	XLOC_013477	0.395558	0.437609	0.745103
	XLOC_012808	0.983522	0.000405027	0.00486413
	XLOC_019155	0.987233	0.000243458	0.00340838
LPIN1	XLOC_011194	-0.615925	0.192942	0.245376
	XLOC_019584	-0.607908	0.200465	0.252301
	XLOC_002110	-0.590361	0.217336	0.267687
	XLOC_023658	-0.584838	0.22276	0.272653
	XLOC_005053	-0.538028	0.270831	0.316579
	XLOC_026943	-0.524055	0.285879	0.330383
	XLOC_015932	-0.334543	0.516906	0.546288
	XLOC_005292	-0.241863	0.644279	0.667232
	XLOC_011777	-0.0572608	0.914203	0.921072
	XLOC_015754	0.788834	0.0621786	0.120198
	XLOC_009502	0.858149	0.0287555	0.0802371
	XLOC_017606	0.94231	0.00489622	0.0367942
	XLOC_003704	0.974651	0.000955732	0.0212866
ABCG2	XLOC_011194	-0.692939	0.126954	0.184192
	XLOC_019584	-0.68586	0.132525	0.18943
	XLOC_002110	-0.667787	0.147215	0.203149
	XLOC_023658	-0.64599	0.165802	0.220383
	XLOC_026943	-0.625623	0.184001	0.237201
	XLOC_005053	-0.621657	0.187636	0.240539
	XLOC_005292	-0.335832	0.51519	0.54468
	XLOC_015932	-0.326252	0.527985	0.556803
	XLOC_011777	0.0678524	0.898378	0.906446
	XLOC_015754	0.755713	0.0822249	0.140953
	XLOC_009502	0.792306	0.0602256	0.118057
	XLOC_017606	0.90048	0.0143636	0.0576479
	XLOC_003704	0.959948	0.00237411	0.0282298
ACSS2	XLOC_011194	-0.653697	0.159123	0.214254
	XLOC_023658	-0.603867	0.204301	0.255817
	XLOC_002110	-0.578621	0.228931	0.278288
	XLOC_005053	-0.572546	0.235023	0.283887
	XLOC_019584	-0.524676	0.285204	0.329766
	XLOC_026943	-0.433295	0.390732	0.427661
	XLOC_015932	-0.42875	0.396283	0.43288
	XLOC_005292	-0.036291	0.945587	0.950014
	XLOC_009502	0.0823031	0.876824	0.886325
	XLOC_015754	0.149194	0.77787	0.793707
	XLOC_017606	0.21901	0.676738	0.698027
	XLOC_003704	0.351041	0.495068	0.525655
	XLOC_011777	0.388047	0.447146	0.480493
SREBF1	XLOC_003497	-0.498911	0.313726	0.495472
	XLOC_019200	-0.169238	0.748567	0.835609
	XLOC_021768	-0.133688	0.800663	0.872232
	XLOC_003635	-0.107925	0.838741	0.897808	KS2_KS3
	XLOC_012115	-0.0672305	0.899306	0.939055
	XLOC_011737	-0.0658977	0.901297	0.940285
	XLOC_002731	-0.0623164	0.906646	0.943803
	XLOC_019411	-0.0237026	0.964453	0.978682
	XLOC_017447	-0.0164777	0.975286	0.985267
	XLOC_013668	0.535911	0.273091	0.456995
FABP3	XLOC_011194	-0.819145	0.046105	0.102144
	XLOC_002110	-0.779685	0.0674612	0.125778
	XLOC_005053	-0.777537	0.06873	0.127109
	XLOC_023658	-0.758203	0.0806305	0.139364
	XLOC_019584	-0.735788	0.09549	0.154107
	XLOC_026943	-0.579398	0.228156	0.277583
	XLOC_015932	-0.507891	0.30367	0.346727
	XLOC_005292	-0.321811	0.533948	0.562452
	XLOC_009502	0.113154	0.830994	0.84356
	XLOC_015754	0.166633	0.752364	0.769692
	XLOC_017606	0.300125	0.563329	0.590306
	XLOC_003704	0.462266	0.355991	0.395244
	XLOC_011777	0.574998	0.232557	0.28163
PPARG	XLOC_011777	-0.788136	0.0625747	0.120624
	XLOC_003704	-0.508379	0.303126	0.346224
	XLOC_013668	-0.506975	0.30469	0.486624
	XLOC_017606	-0.345438	0.502454	0.53263
	XLOC_003497	-0.112007	0.832693	0.893818
	XLOC_009502	-0.104109	0.844401	0.85612
	XLOC_015754	-0.0172813	0.974081	0.976267
	XLOC_019200	0.271787	0.602357	0.730313
	XLOC_005292	0.599416	0.208561	0.259701
	XLOC_026943	0.609249	0.199198	0.25114
	XLOC_015932	0.686669	0.131883	0.188839
	XLOC_023658	0.942787	0.0048164	0.0365534
	XLOC_012115	0.95195	0.0034077	0.0158263
	XLOC_011194	0.960804	0.00227437	0.0278564
	XLOC_019584	0.972694	0.00110824	0.0222231
	XLOC_021768	0.979152	0.000647449	0.00435927
	XLOC_002110	0.990237	0.000142501	0.0135885
	XLOC_005053	0.993744	5.85769e-05	0.0115527
	XLOC_003635	0.994028	5.33915e-05	0.000656599
	XLOC_019411	0.997236	1.14485e-05	0.000220164	KS2_KS3
	XLOC_011737	0.998543	3.18323e-06	9.36579e-05
	XLOC_017447	0.998582	3.01576e-06	9.01216e-05
	XLOC_002731	0.999175	1.01981e-06	4.61831e-05
XDH	XLOC_011194	-0.79315	0.0597551	0.117569
	XLOC_019584	-0.786769	0.0633539	0.121428
	XLOC_002110	-0.772444	0.071781	0.130304
	XLOC_023658	-0.762661	0.0778103	0.136483
	XLOC_005053	-0.730664	0.0990438	0.15754
	XLOC_026943	-0.641776	0.169502	0.223782
	XLOC_015932	-0.445562	0.375885	0.41382
	XLOC_005292	-0.347826	0.499301	0.529667
	XLOC_011777	0.192891	0.714252	0.733664
	XLOC_015754	0.642513	0.168853	0.22318
	XLOC_009502	0.720565	0.106216	0.164472
	XLOC_017606	0.859242	0.0283247	0.079656
	XLOC_003704	0.934487	0.00629727	0.0405309
SGPL1	XLOC_011777	-0.714898	0.110338	0.16848
	XLOC_013668	-0.615456	0.193379	0.37145
	XLOC_003704	-0.513912	0.296995	0.340599
	XLOC_017606	-0.357556	0.486522	0.517575
	XLOC_009502	-0.130321	0.805625	0.819784
	XLOC_015754	-0.0746657	0.88821	0.896949
	XLOC_003497	0.114236	0.829391	0.891628
	XLOC_019200	0.232075	0.658137	0.769457
	XLOC_026943	0.478587	0.336929	0.37754
	XLOC_015932	0.690002	0.129253	0.186357
	XLOC_005292	0.70853	0.115051	0.172939
	XLOC_023658	0.82085	0.045267	0.101171
	XLOC_011194	0.856118	0.0295638	0.0813268
	XLOC_019584	0.880078	0.0207097	0.0684418
	XLOC_012115	0.904991	0.0131114	0.047511
	XLOC_002110	0.91508	0.0105109	0.050189
	XLOC_005053	0.920529	0.00922251	0.0474112
	XLOC_019411	0.954702	0.00303137	0.0144366
	XLOC_017447	0.961039	0.00224737	0.0114449
	XLOC_011737	0.98106	0.000534695	0.00376481
	XLOC_002731	0.982118	0.000476765	0.00345006
	XLOC_003635	0.99245	8.52775e-05	0.000933036
	XLOC_021768	0.998399	3.84162e-06	0.000105424
UGCG	XLOC_013668	-0.541555	0.267082	0.451235
	XLOC_003497	-0.025474	0.961797	0.977183
	XLOC_019200	0.245502	0.639145	0.755355	KS2_KS3
	XLOC_012115	0.934626	0.00627095	0.0258993
	XLOC_019411	0.986276	0.000281229	0.00230332
	XLOC_017447	0.989744	0.000157225	0.00148196
	XLOC_021768	0.993826	5.70686e-05	0.000690223
	XLOC_002731	0.998308	4.29343e-06	0.000113121
	XLOC_011737	0.998407	3.80683e-06	0.000104853
	XLOC_003635	0.999678	1.55669e-07	1.74295e-05
BDH1	XLOC_011194	-0.722047	0.10515	0.163453
	XLOC_005053	-0.710132	0.113857	0.171827
	XLOC_002110	-0.696031	0.124552	0.181929
	XLOC_019584	-0.646304	0.165528	0.220122
	XLOC_023658	-0.64072	0.170435	0.224642
	XLOC_026943	-0.545885	0.262507	0.308951
	XLOC_005292	-0.407365	0.422753	0.457613
	XLOC_015932	-0.397469	0.435193	0.469265
	XLOC_009502	-0.096739	0.855344	0.866337
	XLOC_015754	0.0253835	0.961933	0.965053
	XLOC_017606	0.0867495	0.870202	0.880182
	XLOC_003704	0.264884	0.611967	0.636512
	XLOC_011777	0.664687	0.149802	0.20556

## Sheet: candidate genes
JERSEY				KASHMIRI
candidate gene	corelated lncRNA in JERSEY	Corelation		candidate gene	corelated lncRNA in Kashmiri	Corelation
LPL				LPL	XLOC_019584	-0.624759
GPAM	XLOC_011777	-0.447901		GPAM	XLOC_019584	-0.799872
VLDLR				VLDLR	XLOC_013668	-0.508539
DGAT1				DGAT1
ABCA1				ABCA1
LPIN1				LPIN1	XLOC_011194	-0.615925
ABCG2	XLOC_011777	-0.428578		ABCG2	XLOC_011194	-0.692939
INSIG1				INSIG1						XLOC_019584
ACSS1				ACSS1						XLOC_019584
INSIG2				INSIG2						XLOC_013668
ACSS2				ACSS2	XLOC_011194	-0.653697
SCAP	XLOC_002110	-0.78347		SCAP
ACSL1				ACSL1						XLOC_011194
SREBF1				SREBF1	XLOC_003497	-0.498911				XLOC_011194
SREBF2				SREBF2
FABP3				FABP3	XLOC_011194	-0.819145
THRSP				THRSP
PPARG				PPARG	XLOC_011777	-0.788136				XLOC_011194
ACACA				ACACA
PPARGC1A				PPARGC1A
FADS1				FADS1						XLOC_003497
PPARGC1B				PPARGC1B
FADS2				FADS2						XLOC_011194
FASN	XLOC_011777	-0.422787		FASN
SPTLC1	XLOC_022241	-0.886731		SPTLC1						XLOC_011777
SPTLC2				SPTLC2
SPHK2				SPHK2
XDH				XDH	XLOC_011194	-0.79315
SGPL1				SGPL1	XLOC_011777	-0.714898
UGCG	XLOC_022241	-0.755032		UGCG	XLOC_013668	-0.541555
OSBP				OSBP
BDH1	XLOC_026943	-0.575446		BDH1	XLOC_011194	-0.722047
OSBPL2				OSBPL2
OXCT1				OXCT1
CSN1S1				CSN1S1
CSN1S2				CSN1S2
CSN3				CSN3
CSN2				CSN2
LGB				LGB
LALBA	XLOC_011777	-0.427355		LALBA
HK2				HK2
SLC2A1				SLC2A1
SLC2A4				SLC2A4
SLC2A8	XLOC_002110	-0.900298		SLC2A8

## Sheet: Sheet1
JERSEY CATTLE
candidate gene	corelated lncRNA in JERSEY	Pearson correlation coefficient	P-Value	Adjusted P-Value	No. of transcripts	Positive corellations	Negetive corellations
GPAM	XLOC_011777	-0.447901	0.373076	0.527264	13	10	3
ABCG2	XLOC_011777	-0.428578	0.396493	0.531652	13	10	3
SCAP	XLOC_002110	-0.78347	0.0652521	0.114734	21	7	14
FASN	XLOC_011777	-0.422787	0.403605	0.533591	14	11	3
SPTLC1	XLOC_022241	-0.886731	0.0185181	0.0429732	21	14	7
UGCG	XLOC_022241	-0.755032	0.0826636	0.137075	34	20	14
BDH1	XLOC_026943	-0.575446	0.232107	0.296652	21	15	6
LALBA	XLOC_011777	-0.427355	0.397991	0.532152	13	10	3
SLC2A8	XLOC_002110	-0.900298	0.0144153	0.0352849	21	7	14
KASHMIRI CATTLE						104	67	171
candidate gene	corelated lncRNA in Kashmiri	Pearson correlation coefficient	P-Value	Adjusted P-Value	No. of transcripts
LPL	XLOC_019584	-0.624759	0.184791	0.237934	26	4	22
GPAM	XLOC_011777	0.211866	0.686957	0.707751	13	5	8
VLDLR	XLOC_013668	-0.508539	0.302949	0.635968	6	4	2
LPIN1	XLOC_015932	-0.334543	0.516906	0.546288	13	4	9
ABCG2	XLOC_011777	0.0678524	0.898378	0.906446	13	5	8
ACSS2	XLOC_011194	-0.692939	0.126954	0.184192	13	5	8
SREBF1	XLOC_003497	-0.498911	0.313726	0.495472	10	1	9
FABP3	XLOC_005292	-0.321811	0.533948	0.562452	13	4	9
PPARG	XLOC_003497	-0.112007	0.832693	0.893818	23	16	7
XDH	XLOC_017606	0.859242	0.0283247	0.079656	13	5	8
SGPL1	XLOC_019584	0.880078	0.0207097	0.0684418	23	7	16
UGCG	XLOC_019411	0.986276	0.000281229	0.00230332	10	8	2
BDH1	XLOC_011194	-0.722047	0.10515	0.163453	13	4	9
						72	117	189
								360
